# Supplementary material for: Genomic analysis reveals fifty years of antimicrobial resistance evolution in husbandry Escherichia coli from China
Source: Research Square preprint supplement (doi:10.21203/rs.3.rs-484138/v1), 2021-05-19
Supplement: Supplementary file 1 [file 09ce5174516d4391049f4962.docx]

**Supplementary data**

**
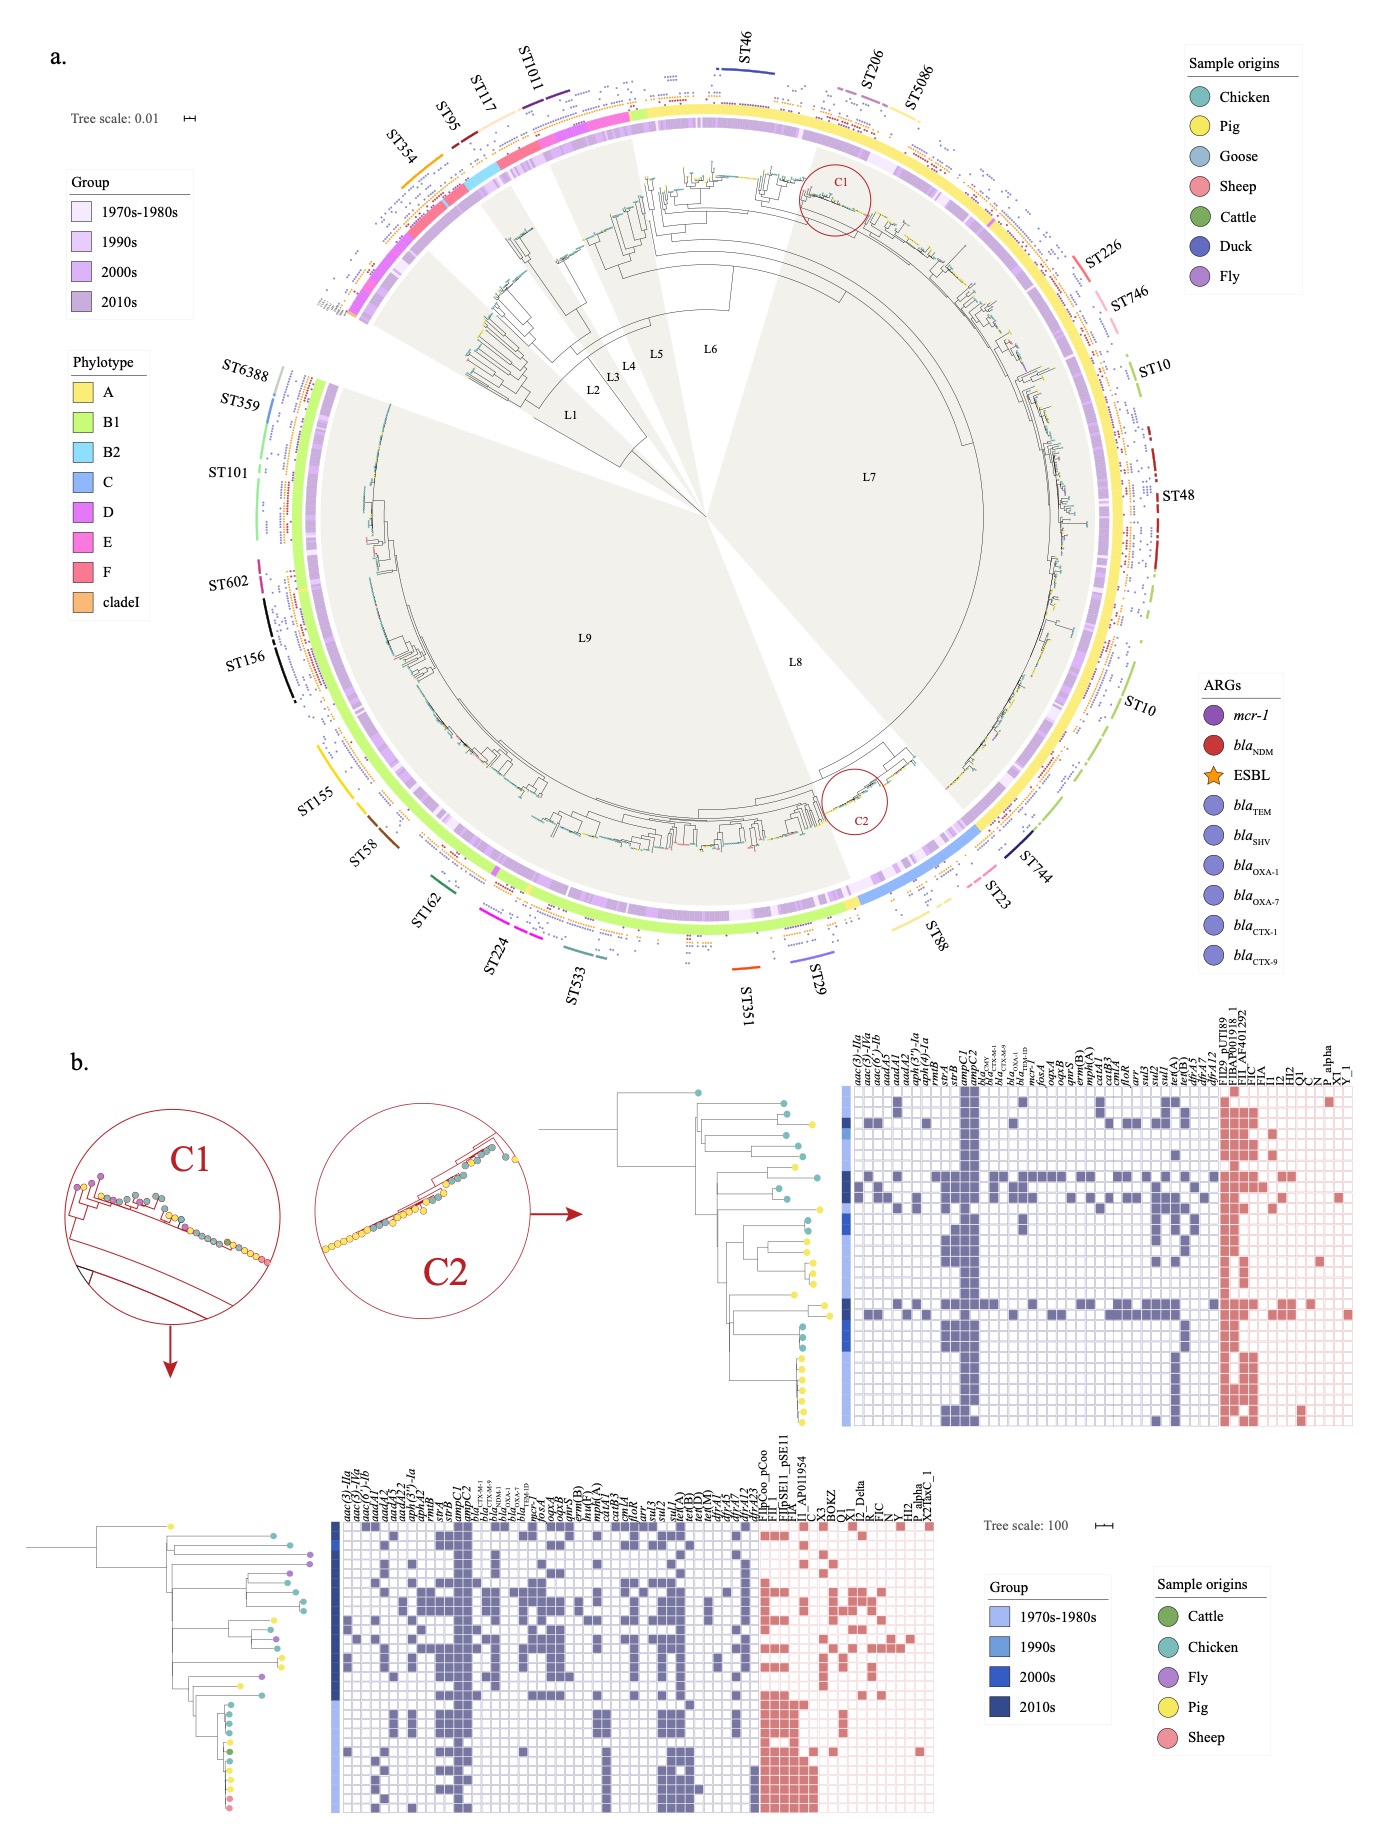
**

**Fig. S1 a. Phylogenetic tree of 982 *E. coli* isolates from food-animal in China.** The midpoint-rooted tree was constructed using n=50672 core-genome SNPs, and the tree along with all these metadata have been uploaded to microreact (<https://microreact.org/project/9ozGFW62hE7LmgkVZ9Uouh/449bbe4b>). **b. Phylogenetic tree of the two clades C1 and C2 highlighted in Fig. 1a and annotated by host, time group and gene content.** The tips are colored by the host. Columns are as follows: sampling time, and presence or absence of ARGs (blue) and plasmid replicons (red).

**
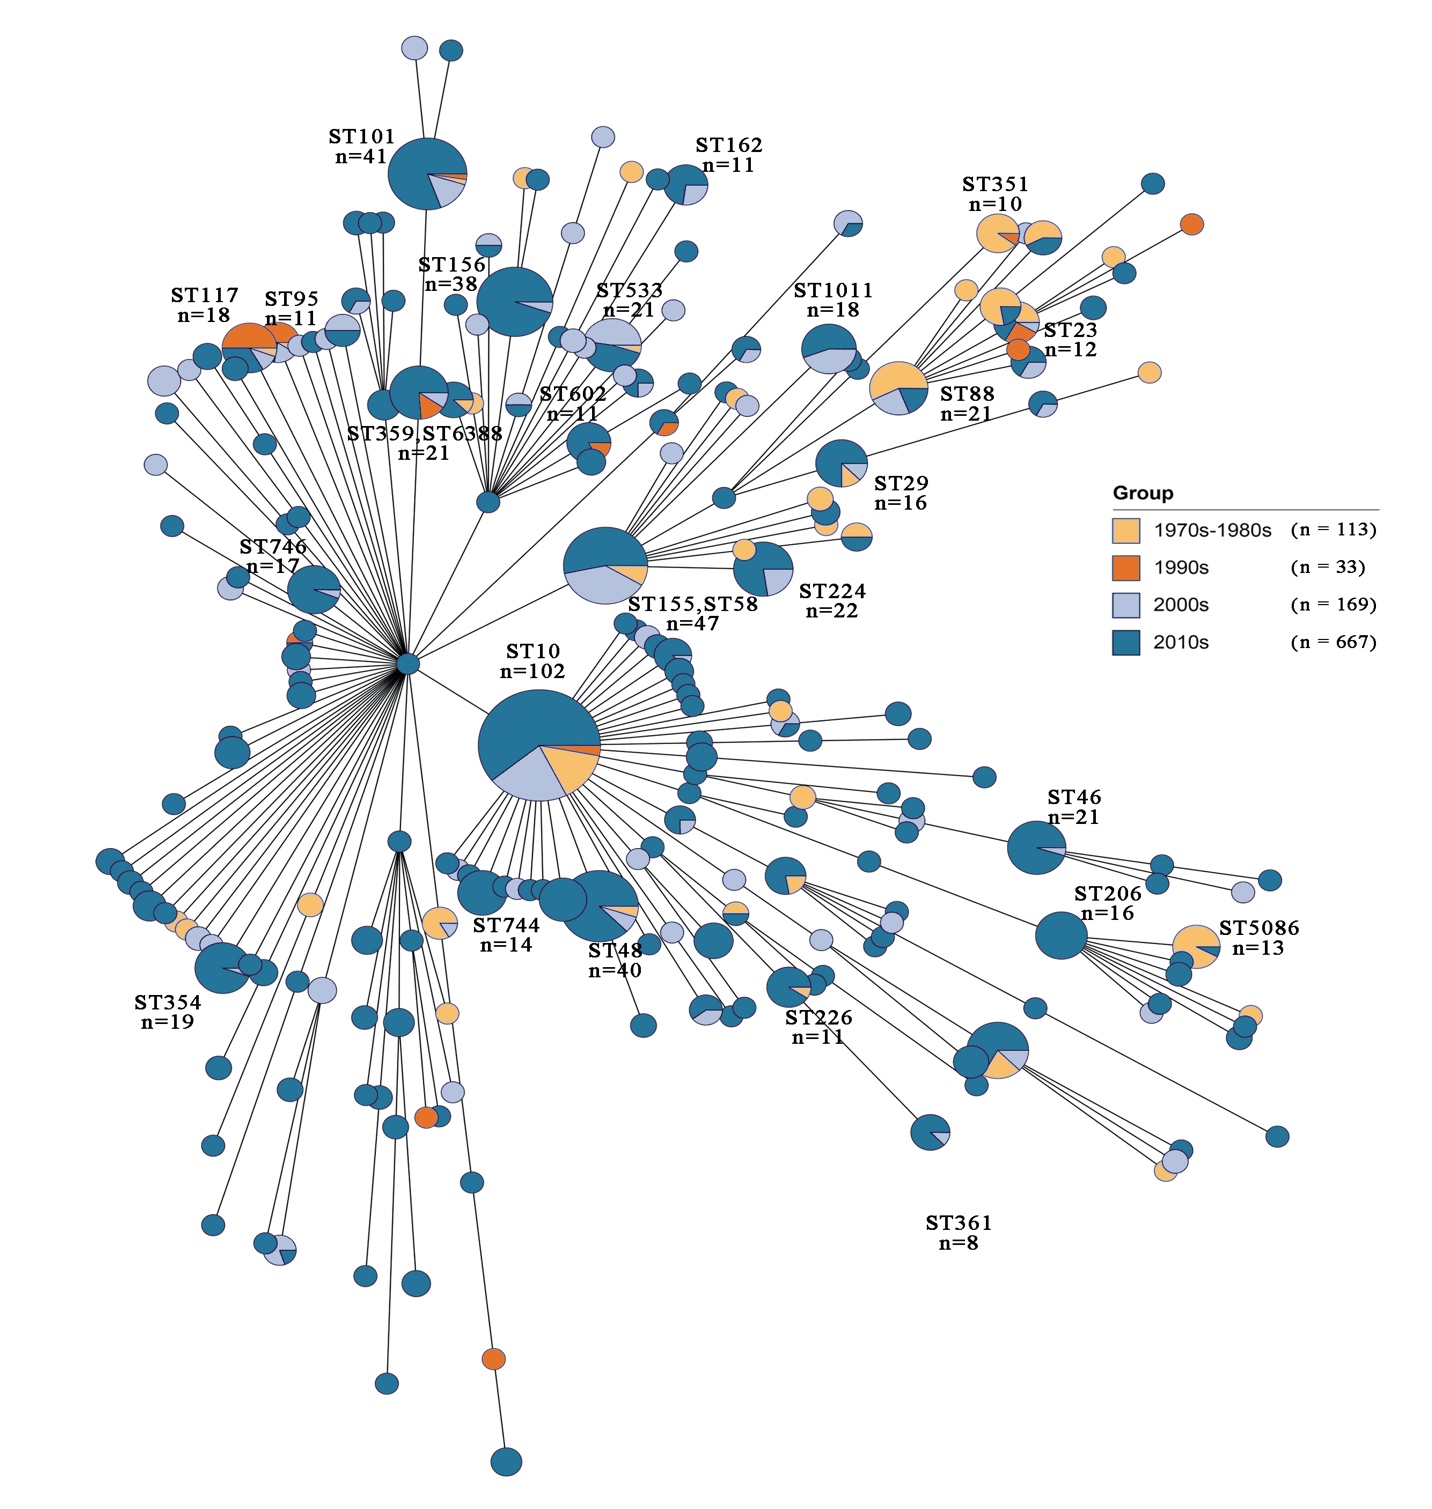
**

**Fig. S2 Minimum spanning tree of the whole data set by multi-locus sequence typing.** The time group of all isolates is indicated by different colors**.**

**
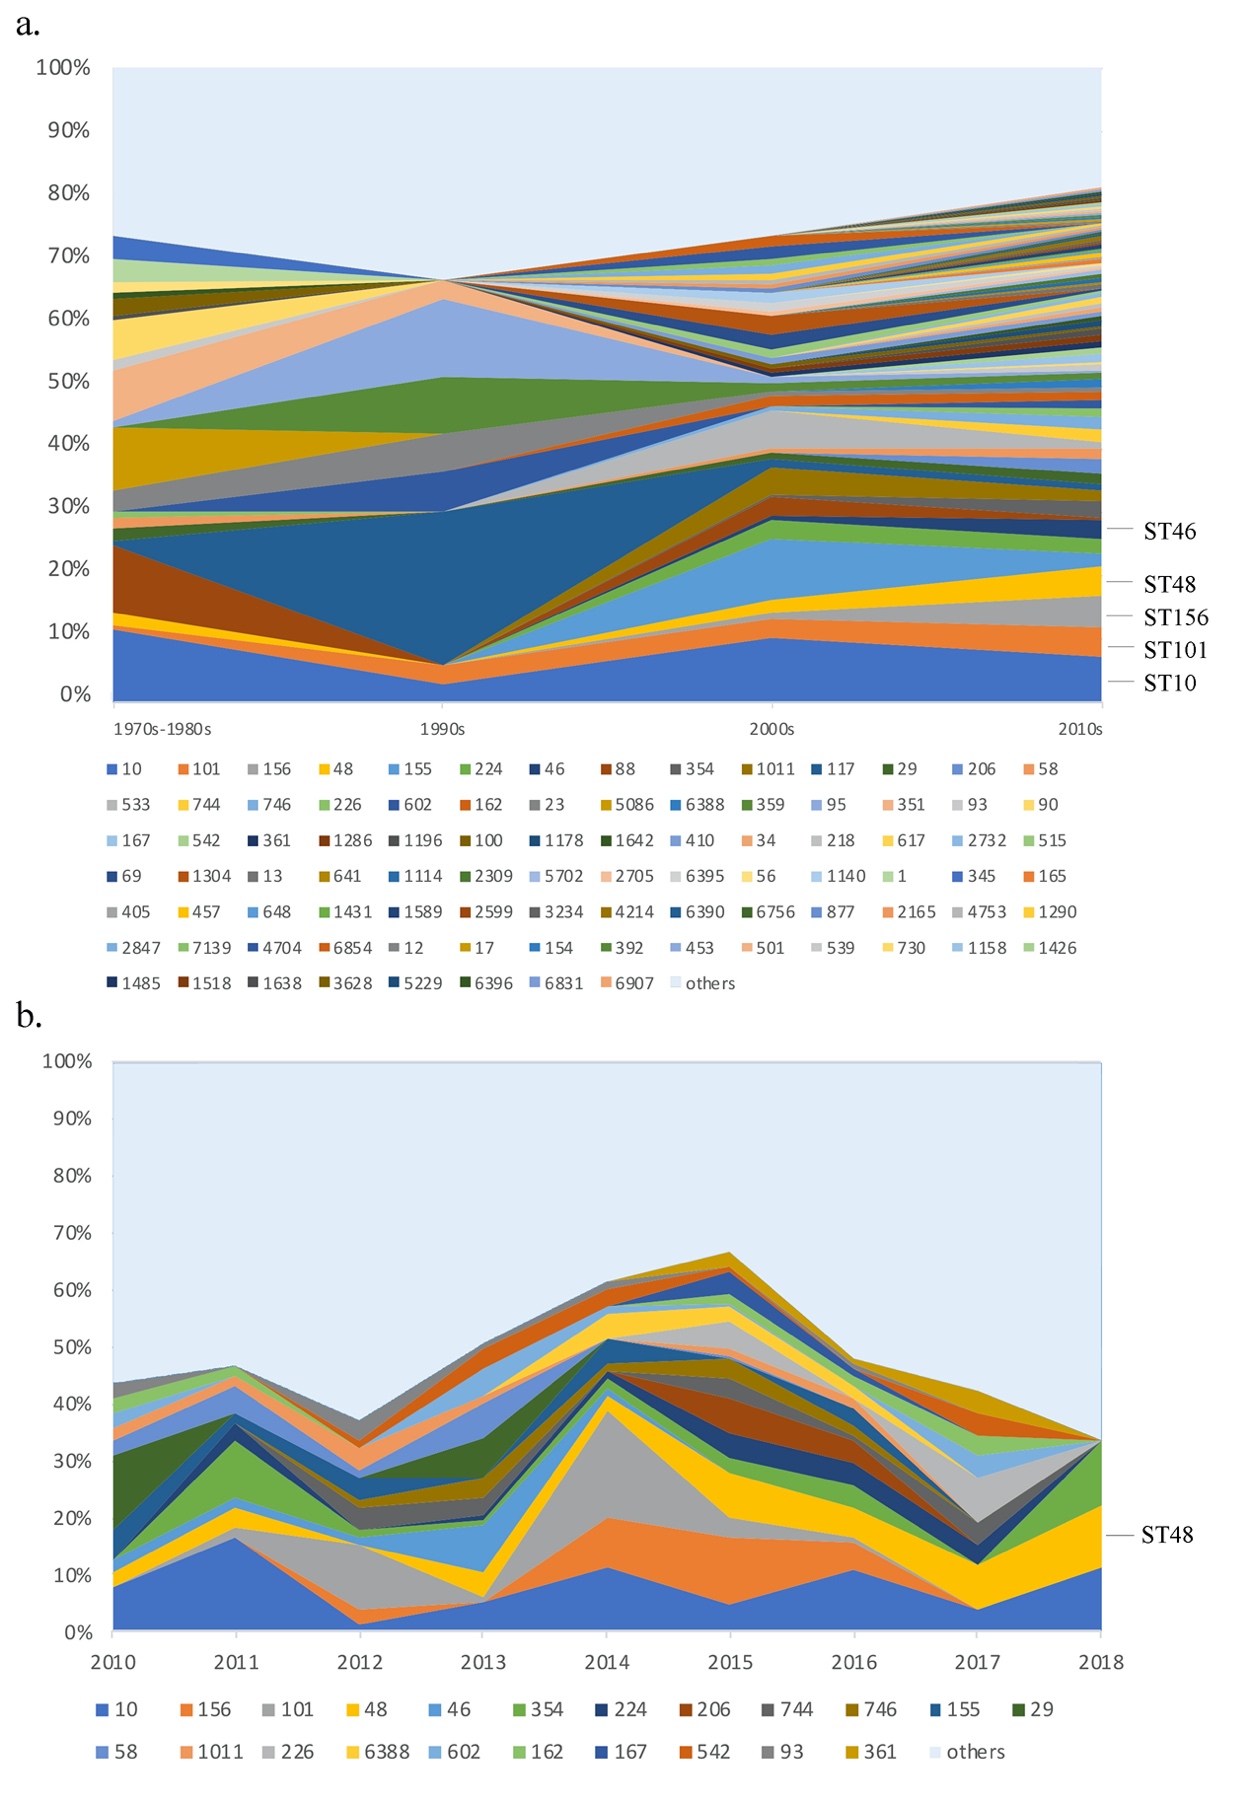
**

**Fig. S3 a. The prevalence of different *E. coli* sequence types in different time groups.** **b. The prevalence of different *E. coli* sequence types in the 2010s.**

**Fig. S4 (a) Prevalence of some specific STs with a rising (red) or declining (blue) trend over time and (b) the ARG containing numbers in these STs.** The average numbers were noted by “x”, and discrete numbers were showed as dots. For some groups like ST46, most of the isolates (n = 17) contain same n umber of ARGs (n = 9, including colistin resistance gene *mcr-1*), which were overlapped on the “x”.

**Fig. S5 Number of genes in a. pangenome, b. chromosome pan-genome, and c. plasmid pan-genome.**

**Fig. S6** **The distribution of the number of plasmid replicon genes and virulence genes per isolate in different time group.** The mean ARG count for each group is noted above. The “*” on the right represent p-values. *: p < 0.05; **: p < 0.01; ***: p < 0.001.

**
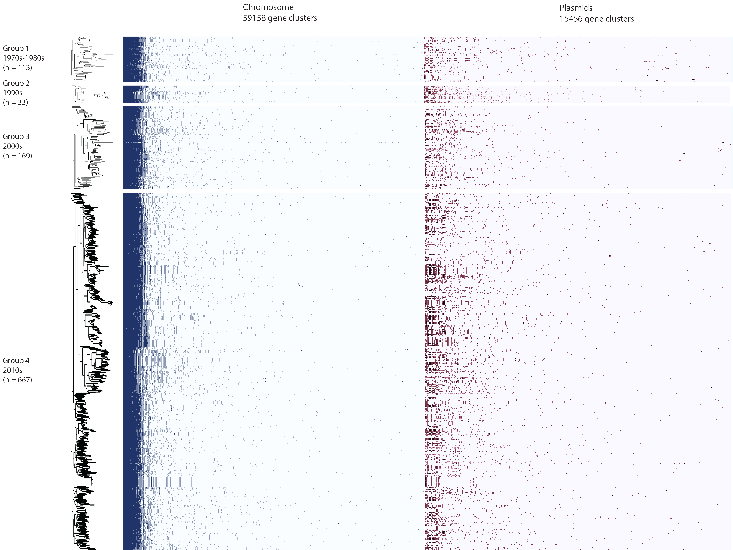
**

**Fig. S7 Gene content matrix clustered within each time groups and separated by the gene location (chromosome and plasmids).**

**Fig. S8 a.** **The prevalence of plasmid replicon genes grouped by time and host.** **b. The P-values of pairwise comparisons of prevalence of time-groups.**

**Fig. S9 a.** **The prevalence of virulence genes grouped by time and host.** The virulence genes were clustered by function and the name of classes were annotated on the left. **b. The P-values of pairwise comparisons of prevalence of time-groups.**

**Fig. S10 The P-value of all possible pairwise** **comparisons of ARG prevalence of time-groups.**

**Fig. S11 The value of antimicrobial production with phenotype and genotype changes over the time. a.** The dark grey histogram shows the mean value of production of norfloxacin per year in different time groups. The light grey histogram shows the mean value of production of other quinolones used in animals (ciprofloxacin, ofloxacin, levofloxacin, lomefloxacin, pefloxacin and pipemidic acid) per year, and data were only available from 2000s. The black line represents the prevalence of norfloxacin resistance and the orange lines represent the prevalence of quinolone-resistant genes. **b.** The histogram shows the mean value of production of colistin in different time groups. The black line represents the prevalence of colistin resistance and the green line represent the prevalence of colistin-resistant gene *mcr-1*. Production data before 2000 were unavailable.


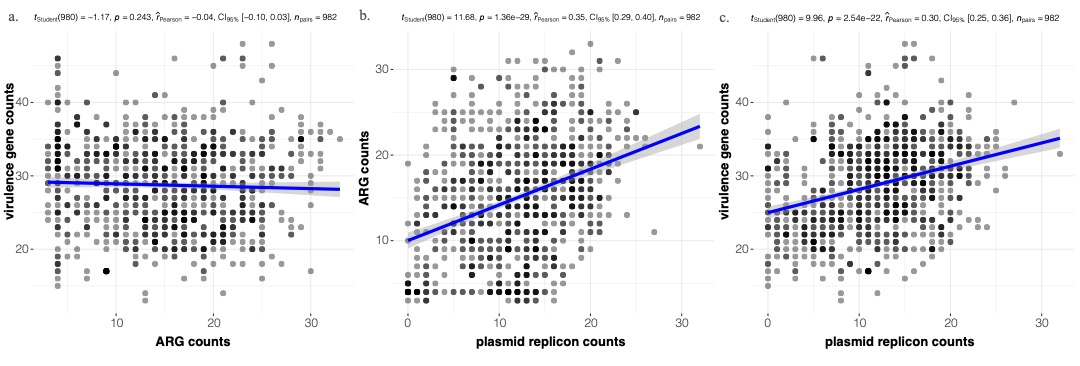


**Fig. S12 The correlation of mean counts of ARGs, plasmid replicons, and virulence genes detected from genomes.** a. The correlation between ARG and virulence genes counts. b. The correlation between plasmid replicon and ARG counts. c. The correlation between plasmid replicons and virulence gene counts.

**Fig. S13 The co-occurrence of ARGs and plasmid replicons in different time groups.** The first two of the groups (1970s-80s and 1990s) were merged as “before 2000”, due to the smaller quantities of isolates. We define the false discovery rate (FDR) threshold as 0.05 in this algorithm; significant pairwise values from 1 (blue) to -1 (red) (i.e. co-occurrence and mutual exclusivity) are shown.The blue box labelled “ARG-ARG” shows the pairwise co-occurrence and mutual exclusivity of ARGs, and the red box labelled “plasmid-plasmid” shows the pairwise co-occurrence and mutual exclusivity of plasmid replicons. The gold boxes labelled with numbers indicate the co-occurrence and mutual exclusivity between ARGs and plasmid replicons, and these are annotated on the bottom left.


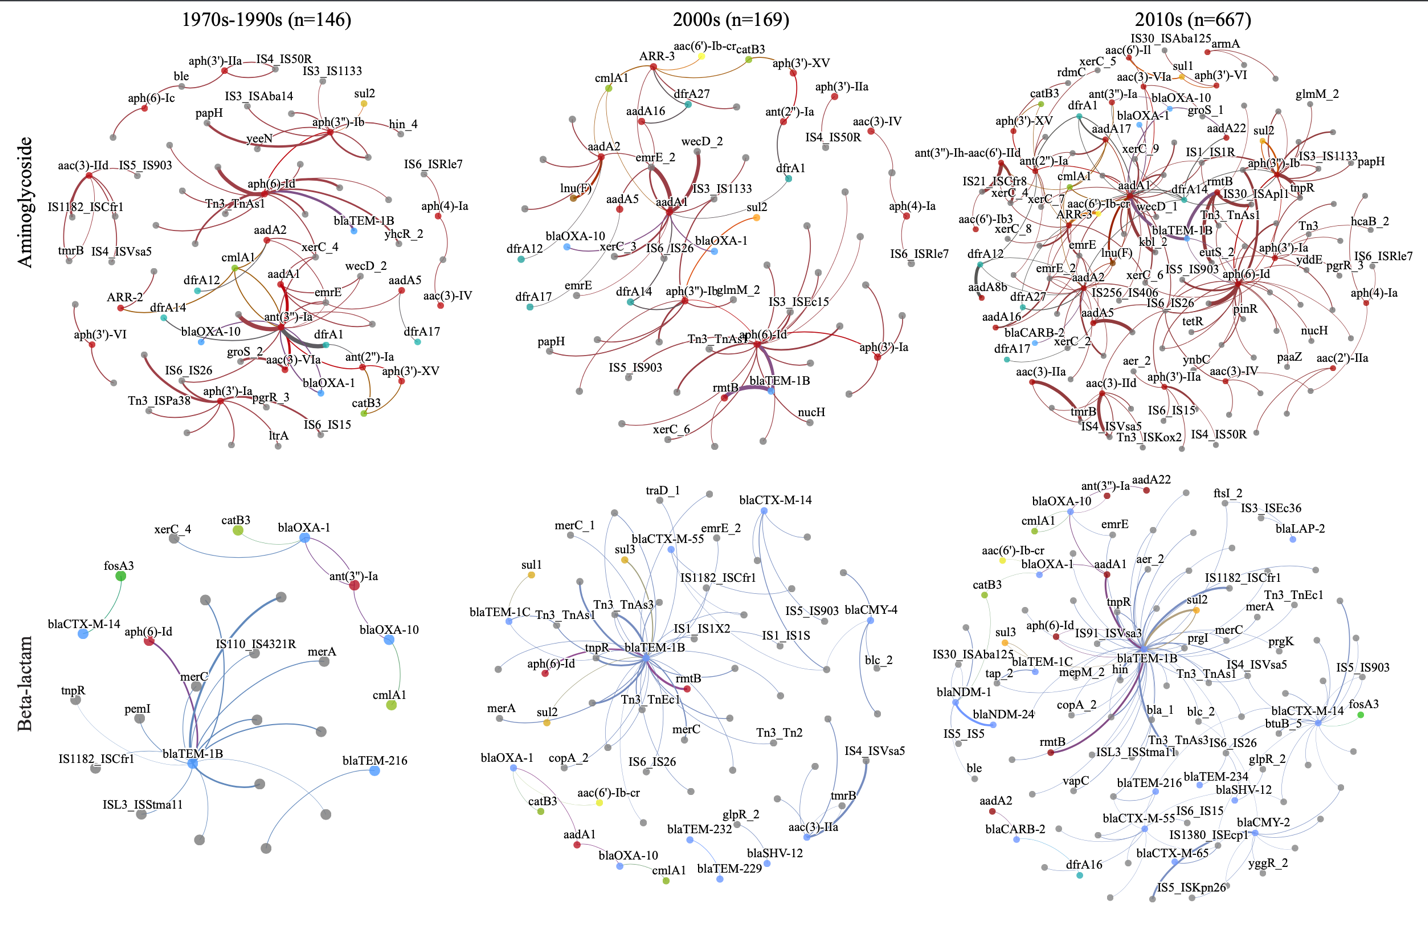


**Fig. S14** **ARG co-occurrence networks of** **aminoglycoside and beta-lactam resistance genes among isolates grouped by sampling time: 1970s-1990s (n=146), 2000s (n=169) and 2010s (n=667).** Nodes represent genes and are colored to represent the antimicrobial class for ARGs; aminoglycoside: red; β-lactam: blue; trimethoprim: cyan; phenicol: green; rifampin: pink; fluroquinolones: yellow; poymyxins: orange; grey: non-ARG. Unlabelled nodes were annotated as hypothetical protein. Edges are coloured according to the nodes the connect.Edge widths represent connection weight calculated by Roary.

**Supplementary Tables**

**The following tables are showed in this file:**

**Table S2.** The prevalence of resistant of 16 antimicrobials in four time-groups.

**Table S4.** The antimicrobial usage on animals in China in the last five decades.

**Table S5.** The gross output value of veterinary medicine in different time.

**Table S6.** Information of 532 isolates downloaded from NCBI.

**The following tables are available in xlsx file:**

**Table S1.** Details of 982 isolates of *E. coli*, including metadata with addition of gene screening and pan-genome statistical results.

**Table S3.** Gene screening results of plasmid replicons, ARGs and virulence genes.

**Table S2. The prevalence of resistant of 16 antimicrobials in four time-groups.**

|  | Time | 1970-1980s | 1990s | 2000s | 2010s |
| --- | --- | --- | --- | --- | --- |
|  | Gentamicin | 3.66% | 28.57% | 27.66% | 48.24% |
|  | Apramycin | 1.22% | 0.00% | 2.13% | 17.09% |
|  | Tetracycline | 65.85% | 82.14% | 86.52% | 80.40% |
|  | Tigecycline | 1.22% | 0.00% | 10.64% | 0.00% |
|  | Norfloxacin | 0.00% | 3.57% | 33.33% | 38.69% |
|  | Florfenicol | 0.00% | 14.29% | 30.50% | 53.77% |
|  | Chloramphenicol | 45.12% | 60.71% | 43.26% | 52.26% |
|  | Colistin | 0.00% | 0.00% | 13.48% | 43.22% |
|  | Ampicillin | 24.39% | 67.86% | 77.30% | 72.86% |
|  | Amoxicillin/Clavulanic acid | 13.41% | 71.43% | 59.57% | 53.77% |
|  | Meropenem | 0.00% | 0.00% | 0.00% | 1.01% |
|  | Cefazolin | 1.22% | 25.00% | 22.70% | 49.25% |
|  | Cefoxitin | 0.00% | 0.00% | 4.96% | 18.09% |
|  | Ceftiofur | 0.00% | 0.00% | 8.51% | 38.69% |
|  | Aztreonam | 1.22% | 0.00% | 5.67% | 34.17% |
|  | Trimethoprim/Sulfamethoxazole | 74.39% | 67.86% | 77.30% | 74.37% |

**Table S4.** The antimicrobial usage on animals in China.

| **Time** | **In use1** | **Ceased using** |
| --- | --- | --- |
| 1960s | Penicillin, tetracyclines, streptomycin, sulfonamides, and chloramphenicol (in the late 1960s) |  |
| 1970s | All above, plus ampicillin, kanamycin, and gentamicin (in the late 1970s) |  |
| 1980s | All above plus FQs (in the late 1980s) |  |
| 1990s | All above, the use of FQs were increasing. Florfenicol and ceftiofur were used in the late 1990s. | The use of penicillin, streptomycin, and chloramphenicol was decreasing. |
| 2000s | All above except for the banned ones. | In 2002, MOA have banned the usage of chloramphenicol in agriculture2, followed by vancomycin in 20053 |
| 2010s | All above except for the banned ones. | Norfloxacin, pefloxacin, lomefloxacin and ofloxacin were banded for use in food-producing animals by 20164. Colistin was banned from animal feeds by April 20175. |

**Table S5.** The gross output value of veterinary medicine in different time.

| **Time (Time period)** | **Gross output value of veterinary medicine**  **(billion RMB)** |
| --- | --- |
| 1987(1970s-80s) | 0.2126 |
| 1995(1990s) | 4.0736 |
| 2007(2000-2007) | 19.5976 |
| 2011(2008-2011) | 377 |
| 2015(2012-2015) | 46.2318 |
| 2017(2016-2017) | 52.2459 |

**Table S6.** **Information of 532 isolates downloaded from NCBI.**

| BioProject | No. | Host/n | Collection time | Preference of isolating |
| --- | --- | --- | --- | --- |
| PRJNA23096910 | 9 | Pig | 2000/10/10 | US FDA surveillance project for the rapid detection of foodborne contamination events |
| PRJNA35772211 | 3 | Pig | 2000 | US FDA surveillance effort for the rapid traceback of foodborne pathogens |
| PRJNA547507 | 1 | Cow | 2018/5/1 | WGS data for *E. coli* |
| PRJNA531750 | 3 | Pig | 2018/1 | WGS data for *E. coli* |
| PRJNA534136 | 1 | Pig | 2018/12/1 | WGS data for *E. coli* |
| PRJNA564204 | 1 | Pig | 2014 | WGS data for *E. coli* |
| PRJNA565670 | 1 | Chicken | 2017/1/1 | WGS data for *E. coli* |
| PRJNA526123 | 2 | Pig | 2017/7 | WGS data for *E. coli* |
| PRJNA528364 | 1 | Pig | 2017/8/16 | WGS data for *E. coli* |
| PRJNA588380 | 1 | Pig | 2019/7/1 | WGS data for *E. coli* |
| PRJNA588383 | 1 | Pig | 2019/7/1 | WGS data for *E. coli* |
| PRJNA588384 | 1 | Pig | 2019/7/1 | WGS data for *E. coli* |
| PRJNA588386 | 1 | Pig | 2019/7/1 | WGS data for *E. coli* |
| PRJNA450836 | 19 | Bovine/4  Chicken/10  Pig/5 | 2014 | investigate the genetic diversity and relationship of *E. coli* clinical strains |
| PRJNA38069212 | 1 | Chicken | 2015/6/23 | domestic chicken gut microbiota |
| PRJNA307142 | 142 | Bovine/16  Sheep/57  Pig/69 | 1976-2014 | Evolution study |
| PRJNA51424513 | 52 | Broiler/39  Pig/13 | 2013-2016 | Not found |
| PRJNA421631 | 1 | | Duck | | --- | | 2007 | Not found |
| PRJNA480178 | 2 | Chicken/1  Pig/1 | 2012, 2016 | Not found |
| PRJNA30878614 | 1 | Pig | 2006 | Extraintestinal pathogenic *E. coli* (ExPEC) |
| PRJNA557097 | 1 | Pig | 2013/11/30 | ExPEC |
| PRJNA294139 | 1 | Pig | 2014 | ExPEC causing fatal pneumonia in pig farm. |
| PRJNA24613215 | 1 | Pig | 2011 | ETEC |
| PRJNA557100 | 1 | Cow | 2018/8/17 | a virulent strain isolated from the dairy cow with acute mastitis |
| PRJNA433057 | 17 | Cow | 2017/8 | ESBL-producing *E. coli* |
| PRJNA34923116 | 131 | Chicken/99  Fly/32 | 2014-2015 | NDM positive *E. coli* |
| PRJNA50791517 | 66 | Bovine/1  Chicken/11  Fly/12  Pig/42 | 2015/7 | Carbapenem-resistant Enterobacteriaceae (CRE) |
| PRJNA565896 | 1 | Chicken | 2018/11/1 | CRE |
| PRJNA565902 | 1 | Duck | 2018/11/1 | CRE |
| PRJNA420050 | 1 | Chicken | 2015/1/12 | *E. coli* co-producing MCR-1 and NDM-1 |
| PRJNA534154 | 1 | Pig | 2018/12/1 | colistin resistance |
| PRJNA515800 | 1 | Pig | 2017/10 | *mcr-1* positive |
| PRJNA434044 | 54 | Chicken | 2016 | *mcr-1* positive |
| PRJNA362688 | 1 | Pig | 2016/7/1 | MCR-1-producing *E. coli* strain isolated from diarrheic piglet |
| PRJNA587053 | 1 | Chicken | 2014/10/20 | fosfomycin resistance Gene *fosA3* |
| PRJNA383767 | 1 | Chicken | 2017/4/21 | avian multoyage resistant *E. coli* |
| PRJNA490022 | 1 | Chicken | 2017/8/1 | Multiple drug-resistant *E. coli* strain |
| PRJNA490024 | 1 | Chicken | 2017/8/1 | Multiple drug-resistant *E. coli* strain |
| PRJNA506117 | 1 | Chicken | 2017/3/1 | The multigrug resistant *E. coli* isolated from diseased chicken |
| PRJNA280577 | 1 | Pig | 1998/7/1 | An *E. coli* that could be induced phage |
| PRJNA280589 | 1 | | Duck | | --- | | 2007/6/16 | An *E. coli* that a induced phage could infect |
| PRJNA288351 | 1 | | Duck | | --- | | 2007/3/1 | containing a phage similar to pro147 |
| PRJNA543425 | 1 | Chicken | 2009/5 | the host strain of bacteriophage Bp7 |
| PRJNA543427 | 1 | Chicken | 2009/5/25 | resistant to phage Bp7 |

**References**

1 Li, S. *et al.* Investigation of integrons/cassettes in antimicrobial-resistant Escherichia coli isolated from food animals in China. *Science China* **53**, 613-619 (2010).

2 MOA. Announcement of the Ministry of Agriculture and Rural People's Republic of China No. 193. *China Ministry of Agriculture and Rural Affairs of the People’s Republic of China* (2002).

3 MOA. Announcement of the Ministry of Agriculture and Rural People's Republic of China No. 560. [*http://www.moa.gov.cn/gk/zcfg/nybgz/200806/t20080606_1057240.htm*](http://www.moa.gov.cn/gk/zcfg/nybgz/200806/t20080606_1057240.htm) (2005).

4 MOA. Announcement of the Ministry of Agriculture and Rural People's Republic of China No. 2292. *China Ministry of Agriculture and Rural Affairs of the People’s Republic of China* (2015).

5 MOA. Announcement of the Ministry of Agriculture and Rural People's Republic of China No. 2428. *China Ministry of Agriculture and Rural Affairs of the People’s Republic of China* (2016).

6 Wang, Y. M. *The development trend of Chinese pharmaceutical industry*. (Second Military Medical University Press, 2002).

7 Statistics, N. B. o. China Animal Husbandry and Veterinary Yearbook. 59-59 (2012).

8 Li, M. Current situation and development trend of veterinary drug industry in China. *BeiFangMuYe* (2016).

9 Liu, X. R., Zhang, Y. J. & Zang, H. Y. Analysis of current situation and development trend of veterinary medicine industry in China. *Contemporary livestock and poultry farming* **No.427**, 46-47 (2018).

10 Patel, I. R., Gangiredla, J., Mammel, M. K., Lampel, K. A. & Lacher, D. W. Draft Genome Sequences of the *Escherichia coli* Reference (ECOR) Collection. *Microbiology Resource Announcements* **7** (2018).

11 Lacher, D. W., Mammel, M. K., Gangiredla, J., Gebru, S. T. & Dudley, E. G. Draft Genome Sequences of Isolates of Diverse Host Origin from the *E. coli* Reference Center at Penn State University. *Microbiology Resource Announcements* **9** (2020).

12 Rongqin *et al.* Identification and genomic analysis of antifungal property of a tomato root endophyte *Pseudomonas* sp. p21. *Antonie van Leeuwenhoek* (2016).

13 Souvorov, A., Agarwala, R. & Lipman, D. J. SKESA: Strategic k-mer extension for scrupulous assemblies. *Genome biology* **19** (2018).

14 Bo, H., Meng, X. R., Zhang, L. Y., Tan, C. & Li, S. W. TolC Promotes ExPEC Biofilm Formation and Curli Production in Response to Medium Osmolarity. *Journal of Biomedicine and Biotechnology* **2014**, 574274 (2014).

15 Ren, W. *et al.* Draft Genome Sequence of Enterotoxigenic *Escherichia coli* Strain W25K. *Genome Announcements* **2**, 675 (2014).

16 Shen, Y. *et al.* Anthropogenic and environmental factors associated with high incidence of *mcr-1* carriage in humans across China. *Nature Microbiology* **3**, 1 (2018).

17 Li, J. *et al.* Inter-Host Transmission of Carbapenemase-Producing *Escherichia coli* among Humans and Backyard Animals. *Environmental Health Perspectives* **127** (2019).
