# Supplementary material for: Genomic analysis reveals fifty years of antimicrobial resistance evolution in husbandry Escherichia coli from China
Source: Research Square preprint supplement (doi:10.21203/rs.3.rs-484138/v1), 2021-05-19
Supplement: Supplementary file 3 [file 92d09981249dc5ab319662f9.xlsx]

## Sheet: metadata
ID	source	Group	year	host	ST	phylogroup	lineage	count of plasmid replicons	count of ARGs	count of virulence groups	gene number in chromosome pan-genome	core gene number in chromosome pan-genome	accessary gene number in chromosome pan-genome	gene number in plasmid pan-genome
612	lab	1	1975	Pig	1	D	3	12	3	48	4606	1720	2888	31
LVNB	lab	1	1976	Pig	5086	A	4	11	3	36	4512	1678	2836	152
515	lab	1	1979	Pig	10	A	4	3	10	33	4441	1726	2717	126
GCA_001614955.1_ASM161495v1	lab	1	1979	Pig	-	D	3	16	7	46	4899	1614	3287	252
GCA_001615145.1_ASM161514v1	lab	1	1979	Pig	-	A	4	12	8	39	4519	1682	2839	129
GCA_001615475.1_ASM161547v1	lab	1	1979	Pig	-	A	4	13	5	41	5150	1549	3603	433
LVMK	lab	1	1979	Pig	88	C	2	17	12	40	4579	1703	2878	333
LVNC	lab	1	1979	Pig	100	A	4	12	5	39	5207	1594	3615	438
101	NCBI	1	1980	Sheep	117	F	8	15	8	41	4518	1726	2794	157
134	NCBI	1	1980	Sheep	5236	B1	5	1	4	43	4505	1724	2783	79
GCA_001614875.1_ASM161487v1	lab	1	1980	Pig	10	A	4	20	9	40	4569	1696	2875	284
GCA_001614965.1_ASM161496v1	lab	1	1980	Pig	93	A	6	13	3	42	4544	1696	2850	141
LVQY	lab	1	1980	Sheep	23	C	2	13	7	41	4400	1704	2698	221
LVQZ	lab	1	1980	Sheep	5236	B1	5	1	4	42	4529	1717	2814	81
183	lab	1	1981	Cattle	5086	A	4	20	14	40	4693	1725	2970	496
190	lab	1	1981	Sheep	223	B1	5	0	4	46	4366	1725	2643	19
609	lab	1	1981	Pig	10	A	4	2	6	33	4409	1724	2687	130
611	lab	1	1981	Pig	1	D	3	12	3	45	4618	1723	2897	26
622	lab	1	1981	Pig	5766	A	6	8	14	33	4249	1724	2527	164
646	lab	1	1981	Pig	100	A	4	7	9	42	4946	1726	3222	203
807	lab	1	1981	Goose	1706	B1	5	7	7	48	4519	1726	2795	142
917	lab	1	1981	Pig	764	A	5	15	7	31	4391	1704	2689	302
GCA_001614805.1_ASM161480v1	lab	1	1981	Pig	48	A	4	15	18	31	4467	1712	2757	257
GCA_001615065.1_ASM161506v1	lab	1	1981	Pig	5086	A	4	20	12	30	4524	1702	2824	474
LVLM	NCBI	1	1981	Cattle	691	E	3	11	4	46	4550	1691	2861	123
LVMQ	NCBI	1	1981	Pig	10	A	4	2	6	36	4430	1699	2733	132
LVMR	NCBI	1	1981	Pig	5086	A	4	19	14	29	4519	1691	2830	481
660	NCBI	1	1982	Pig	88	C	2	10	9	43	4605	1725	2882	165
674	lab	1	1982	Pig	88	C	2	10	4	44	4503	1721	2784	247
690	lab	1	1983	Pig	100	A	4	13	9	45	5043	1726	3319	262
698	lab	1	1983	Pig	90	C	2	14	6	44	4740	1726	3016	260
GCA_001614855.1_ASM161485v1	lab	1	1983	Pig	-	A	4	12	9	43	5155	1700	3457	331
GCA_001615305.1_ASM161530v1	lab	1	1983	Pig	764	A	5	16	3	30	4546	1691	2857	344
LVMN	lab	1	1983	Pig	-	B1	5	0	5	42	4740	1712	3030	16
LVMO	lab	1	1983	Pig	90	C	2	18	7	43	4719	1708	3013	404
260	NCBI	1	1984	Cattle	10	A	4	24	13	44	4486	1726	2762	335
262	NCBI	1	1984	Cattle	10	A	4	11	15	42	4411	1726	2687	209
GCA_001615275.1_ASM161527v1	NCBI	1	1984	Pig	1611	B1	5	7	9	37	4614	1704	2912	151
LVLK	lab	1	1984	Cattle	10	A	4	18	15	34	4377	1583	2796	228
LVRA	NCBI	1	1984	Sheep	-	A	4	20	11	31	4531	1704	2829	457
288	lab	1	1986	Cattle	10	A	4	16	16	47	4575	1726	2851	185
LVLR	lab	1	1986	Cattle	10	A	4	16	13	46	4547	1695	2854	231
312	lab	1	1987	Cattle	10	A	4	12	6	45	4563	1726	2839	101
LVLL	lab	1	1987	Cattle	10	A	4	12	6	39	4559	1704	2857	167
LVLN	lab	1	1987	Cattle	56	B1	5	0	3	42	4664	1683	2983	37
LVLT	lab	1	1987	Cattle	446	B1	5	2	4	43	4774	1720	3056	273
277	lab	1	1988	Sheep	5086	A	4	19	13	34	4536	1726	2812	430
845	lab	1	1989	Chicken	95	B2	9	15	18	39	4799	1725	3076	425
103	lab	1		Chicken	345	B1	5	9	10	45	4504	1724	2782	174
104	lab	1		Pig	90	C	2	19	9	43	4694	1726	2970	284
105	lab	1		Pig	23	C	2	0	4	42	4498	1723	2777	2
106	lab	1		Pig	88	C	2	9	4	44	4494	1721	2775	152
108	lab	1		Chicken	88	C	2	7	10	45	4438	1712	2728	102
112	NCBI	1		Chicken	351	B1	5	7	10	45	4532	1726	2808	163
117	NCBI	1		Pig	-	C	2	6	8	43	4568	1723	2847	96
120	NCBI	1		Pig	23	C	2	2	4	42	4557	1723	2836	100
122	NCBI	1		Chicken	345	B1	5	7	11	49	4473	1726	2749	150
123	NCBI	1		Chicken	345	B1	5	8	13	49	4500	1726	2776	132
124	NCBI	1		Chicken	345	B1	5	8	13	49	4445	1726	2721	192
126	NCBI	1		Pig	88	C	2	8	8	43	4478	1726	2754	132
127	NCBI	1		Pig	88	C	2	7	7	46	4627	1721	2908	156
128	NCBI	1		Pig	342	A	5	9	4	74	4594	1721	2875	106
129	lab	1		Chicken	226	A	4	4	6	29	4219	1721	2500	57
130	NCBI	1		Chicken	4358	A	4	6	9	31	4279	1726	2555	129
131	lab	1		Pig	-	A	6	0	5	33	4422	1725	2699	35
132	NCBI	1		Pig	-	A	5	10	4	74	5021	1724	3299	244
133	lab	1		Chicken	301	A	4	9	9	59	4679	1725	2956	267
135	NCBI	1		Pig	88	C	2	8	4	49	4919	1725	3196	200
137	NCBI	1		Cattle	10	A	4	11	7	38	4555	1726	2831	257
139	NCBI	1		Chicken	129	B1	5	11	4	38	4470	1726	2746	115
140	lab	1		Chicken	48	A	4	11	11	34	4236	1718	2520	174
313	lab	1		Chicken	5285	B1	5	12	4	46	4740	1726	3016	161
314	lab	1		Chicken	58	B1	5	2	4	40	4294	1726	2570	96
315	lab	1		Chicken	58	B1	5	4	4	40	4298	1726	2574	140
317	lab	1		Pig	23	C	2	1	4	45	4606	1724	2884	69
395	lab	1		Sheep	56	B1	5	0	4	47	4678	1726	2954	16
502	lab	1		Pig	398	A	6	0	4	25	4034	1725	2311	28
503	lab	1		Chicken	88	C	2	15	6	48	4681	1726	2957	248
504	lab	1		Pig	88	C	2	1	4	43	4380	1726	2656	140
505	lab	1		Chicken	5653	C	2	1	4	34	4433	1724	2711	94
507	lab	1		Chicken	398	A	6	0	4	23	4237	1725	2514	4
508	lab	1		Chicken	88	C	2	13	8	49	4728	1724	3006	164
516	lab	1		Chicken	351	B1	5	7	10	45	4530	1726	2806	170
520	lab	1		Chicken	351	B1	5	7	10	45	4531	1726	2807	165
521	lab	1		Chicken	351	B1	5	7	10	45	4524	1726	2800	175
522	lab	1		Chicken	351	B1	5	7	10	45	4522	1726	2798	166
523	lab	1		Chicken	351	B1	5	7	10	45	4531	1726	2807	157
525	lab	1		Pig	1	D	3	10	5	44	4680	1722	2960	250
532	lab	1		Pig	1196	B1	5	6	24	38	4626	1726	2902	295
533	lab	1		Chicken	5086	A	4	17	10	33	4536	1726	2812	249
535	lab	1		Chicken	5086	A	4	19	15	33	4523	1725	2800	207
537	lab	1		Chicken	29	B1	5	11	4	80	4917	1726	3193	133
538	NCBI	1		Chicken	29	B1	5	11	4	80	4907	1726	3183	144
541	NCBI	1		Chicken	5086	A	4	17	5	35	4487	1725	2764	248
542	lab	1		Chicken	-	B1	5	16	8	41	4568	1726	2844	177
543	NCBI	1		Chicken	5086	A	4	19	15	33	4523	1725	2800	241
544	NCBI	1		Chicken	93	A	6	13	3	43	4524	1726	2800	160
547	NCBI	1		Chicken	10	A	4	8	10	52	4401	1725	2678	131
555	lab	1		Pig	90	C	2	12	6	42	4668	1726	2944	175
556	lab	1		Pig	90	C	2	13	6	42	4664	1724	2942	265
557	lab	1		Pig	90	C	2	14	6	43	4698	1726	2974	275
560	lab	1		Chicken	88	C	2	15	4	49	4562	1725	2839	116
579	lab	1		Chicken	351	B1	5	7	10	45	4532	1726	2808	163
618	NCBI	1		Chicken	351	B1	5	7	10	45	4515	1726	2791	175
831	lab	1		Chicken	101	B1	5	9	12	43	4516	1726	2792	113
5118	lab	1		Chicken	351	B1	5	7	10	45	4524	1726	2800	168
105-2	lab	1		Pig	90	C	2	12	6	42	4687	1726	2963	157
C83534	lab	1		Chicken	5086	A	4	19	15	34	4540	1725	2817	225
GCA_001615015.1_ASM161501v1	NCBI	1		Pig	5086	A	4	20	11	33	4495	1644	2853	468
LVLP	lab	1		Cattle	5331	A	4	1	3	39	4615	1702	2915	43
LVMM	lab	1		Pig	-	B1	5	2	3	40	4641	1655	2988	106
LVND	lab	1		Pig	1	D	3	15	6	45	4913	1713	3202	280
VVIO	lab	1		Pig	1642	B1	5	5	25	38	4574	1726	2850	351
YZ032	lab	2	1995	Chicken	57	E	7	13	14	45	4877	1724	3155	232
YZ069	lab	2	1995	Chicken	115	D	3	20	13	53	5020	1723	3299	508
YZ105	lab	2	1995	Chicken	602	B1	5	17	11	48	4621	1725	2898	482
YZ120	lab	2	1995	Chicken	-	F	8	21	15	37	4863	1726	3139	282
YZ124	lab	2	1995	Chicken	117	F	8	15	13	33	4725	1724	3003	313
YZ126	lab	2	1995	Chicken	95	B2	9	16	14	42	4927	1724	3205	309
YZ156	lab	2	1995	Chicken	1807	C	2	11	4	56	4734	1725	3011	186
YZ207	NCBI	2	1995	Chicken	23	C	2	21	14	44	4524	1726	2800	265
YZ208	NCBI	2	1995	Chicken	117	F	8	16	10	38	4505	1726	2781	277
YZ235	NCBI	2	1995	Chicken	117	F	8	15	9	36	4737	1726	3013	269
YZ258	lab	2	1995	Chicken	117	F	8	16	13	37	4699	1726	2975	366
YZ265	lab	2	1995	Chicken	-	C	2	21	13	47	4485	1725	2762	205
YZ267	lab	2	1995	Chicken	101	B1	5	12	14	45	4663	1726	2939	297
YZ268	lab	2	1995	Chicken	5925	C	2	15	12	47	4702	1726	2978	234
YZ315	lab	2	1995	Chicken	602	B1	5	16	14	44	4657	1725	2934	369
YZ413	lab	2	1995	Chicken	117	F	8	14	13	37	4865	1726	3141	246
YZ483	NCBI	2	1995	Chicken	359	B1	5	13	17	38	4474	1726	2750	130
YZ505	NCBI	2	1995	Chicken	359	B1	5	10	13	42	4484	1726	2760	147
YZ523	lab	2	1995	Chicken	-	B2	9	19	8	39	4538	1721	2819	280
YZ554	lab	2	1995	Chicken	23	C	2	19	13	43	4711	1726	2987	487
YZ606	lab	2	1995	Chicken	2690	A	4	6	16	36	4360	1726	2636	94
YZ610	lab	2	1995	Chicken	95	B2	9	19	14	38	4803	1722	3083	322
YZ618	lab	2	1995	Chicken	95	B2	9	11	15	40	4609	1720	2891	507
YZ629	lab	2	1995	Chicken	351	B1	5	0	4	36	4385	1726	2661	4
YZ644	lab	2	1995	Chicken	117	F	8	20	15	41	4715	1726	2991	164
YZ645	lab	2	1995	Chicken	95	B2	9	7	6	43	4765	1726	3041	142
YZ655	lab	2	1995	Chicken	117	F	8	20	15	42	4718	1720	3000	132
YZ695	lab	2	1995	Chicken	117	F	8	15	9	36	4799	1726	3075	199
GCA_001616015.1_ASM161601v1	lab	2	1996	Pig	6404	B1	5	13	10	39	4557	1723	2836	243
LVOI	lab	2	1996	Pig	10	A	4	4	15	35	4207	1716	2493	93
LBBN	lab	2	1998	Pig	5786	A	4	15	4	36	4652	1724	2930	361
GCA_001616255.1_ASM161625v1	lab	2	1999	Pig	359	B1	5	12	9	38	4423	1726	2699	164
LVOS	lab	2	1999	Pig	-	A	4	16	16	40	4928	1719	3211	368
GCA_002230775.1_ASM223077v1	lab	3	2000	Pig	33	B1	5	19	9	47	4872	1725	3149	356
GCA_002464515.1_ASM246451v1	lab	3	2000	Pig	6602	B1	5	11	12	41	4399	1725	2676	185
GCA_002464525.1_ASM246452v1	lab	3	2000	Pig	10	A	4	7	13	36	4376	1725	2653	106
GCA_002464535.1_ASM246453v1	lab	3	2000	Pig	6601	A	4	0	12	35	4296	1725	2573	34
GCA_002464575.1_ASM246457v1	lab	3	2000	Pig	10	A	4	1	12	31	4335	1725	2612	50
GCA_002464595.1_ASM246459v1	lab	3	2000	Pig	101	B1	5	7	15	34	4341	1725	2618	373
GCA_002464605.1_ASM246460v1	NCBI	3	2000	Pig	359	B1	5	6	14	35	4425	1725	2702	155
NOIE	lab	3	2000	Pig	10	A	4	1	15	34	4369	1726	2645	121
NXMU	lab	3	2000	Pig	101	B1	5	10	16	36	4518	1723	2797	161
SRR9914076	lab	3	2000	Pig	6602	B1	5	12	12	39	4410	1725	2687	224
SRR9914082	lab	3	2000	Pig	101	B1	5	10	15	40	4511	1725	2788	173
SRR9914083	lab	3	2000	Pig	10	A	4	5	11	37	4408	1726	2684	73
GCA_001615895.1_ASM161589v1	lab	3	2001	Pig	2016	B1	5	14	14	43	4823	1725	3100	191
LVNR	lab	3	2001	Pig	1408	A	6	19	16	37	4508	1726	2784	136
F56	lab	3	2002	Chicken	515	B1	6	14	4	32	4500	1726	2776	277
GCA_001615695.1_ASM161569v1	lab	3	2002	Pig	10	A	4	6	17	35	4467	1726	2743	106
GCA_001615735.1_ASM161573v1	NCBI	3	2002	Pig	-	A	4	1	9	30	4227	1725	2504	39
GCA_001616415.1_ASM161641v1	NCBI	3	2002	Pig	5995	A	4	17	17	44	4679	1725	2956	356
GDF15	lab	3	2002	Chicken	295	B1	5	15	8	44	4750	1724	3028	130
GDF52	NCBI	3	2002	Chicken	515	B1	6	14	4	31	4454	1726	2730	136
GDF53	NCBI	3	2002	Chicken	1079	B1	5	1	4	44	4889	1726	3165	145
GDF61	lab	3	2002	Chicken	-	B1	5	10	6	36	4931	1482	3451	222
GDS160	lab	3	2002	Chicken	939	A	5	0	4	35	4393	1726	2669	3
GDX124	lab	3	2002	Chicken	7139	A	4	2	14	33	4425	1724	2703	62
GDX134	lab	3	2002	Chicken	7139	A	4	2	14	33	4426	1724	2704	65
JX3	lab	3	2002	Chicken	155	B1	5	9	12	42	4422	1726	2698	176
JX5	lab	3	2002	Chicken	155	B1	5	11	10	47	4515	1726	2791	208
JX6	lab	3	2002	Chicken	6854	E	3	14	9	51	4890	1724	3168	411
JX7	lab	3	2002	Chicken	6854	E	3	14	9	51	4922	1724	3200	381
JX9	lab	3	2002	Chicken	6854	E	3	14	9	51	4902	1724	3180	396
LN100	lab	3	2002	Chicken	69	D	3	12	14	56	4797	1724	3075	357
LN101	lab	3	2002	Chicken	69	D	3	14	14	56	4816	1724	3094	429
LN105	lab	3	2002	Chicken	155	B1	5	15	11	45	4541	1726	2817	222
LN129	lab	3	2002	Chicken	533	B1	5	11	9	39	4530	1726	2806	154
LN130	lab	3	2002	Chicken	533	B1	5	11	9	39	4499	1726	2775	196
LN131	lab	3	2002	Chicken	155	B1	5	10	13	41	4502	1725	2779	152
LN132	lab	3	2002	Chicken	4704	A	4	3	13	35	4443	1725	2720	193
LN137	lab	3	2002	Chicken	746	A	4	4	10	36	4488	1719	2771	78
LN140	lab	3	2002	Chicken	2179	B1	5	17	13	42	4454	1725	2731	123
LN141	lab	3	2002	Chicken	6395	A	4	5	17	34	4384	1725	2661	84
LN142	lab	3	2002	Chicken	4704	A	4	3	13	35	4436	1726	2712	200
LN143	lab	3	2002	Chicken	6395	A	4	9	14	38	4408	1725	2685	161
LN144	lab	3	2002	Chicken	-	B1	5	7	14	42	4460	1726	2736	127
LN149	lab	3	2002	Chicken	1011	D	7	12	17	49	4459	1726	2735	155
LN150	lab	3	2002	Chicken	4704	A	4	1	13	35	4443	1726	2719	79
LN2	NCBI	3	2002	Chicken	46	A	6	18	13	38	4445	1724	2723	120
LN36	NCBI	3	2002	Chicken	6793	A	4	11	14	32	4262	1722	2542	194
LN44	NCBI	3	2002	Chicken	4753	E	7	20	14	49	4737	1726	3013	258
LN62	NCBI	3	2002	Chicken	533	B1	5	14	8	38	4473	1726	2749	246
LN65	NCBI	3	2002	Chicken	88	C	2	7	7	44	4654	1726	2930	156
LN67	NCBI	3	2002	Chicken	88	C	2	8	7	44	4648	1726	2924	155
LN68	lab	3	2002	Chicken	533	B1	5	14	8	38	4574	1726	2850	146
LN81	lab	3	2002	Chicken	155	B1	5	8	7	45	4498	1726	2774	143
LN83	lab	3	2002	Chicken	533	B1	5	16	9	39	4565	1726	2841	245
LN84	lab	3	2002	Chicken	88	C	2	8	10	43	4661	1725	2938	161
LN85	lab	3	2002	Chicken	88	C	2	8	9	43	4694	1725	2971	119
LN86	NCBI	3	2002	Chicken	88	C	2	7	7	44	4653	1726	2929	153
LN92	NCBI	3	2002	Chicken	1011	D	7	2	8	46	4554	1725	2831	64
LN94	NCBI	3	2002	Chicken	2179	B1	5	21	11	41	4499	1726	2775	155
LN95	lab	3	2002	Chicken	1112	A	6	6	7	34	4571	1725	2848	66
LN97	lab	3	2002	Chicken	155	B1	5	7	10	42	4645	1726	2921	282
LN98	NCBI	3	2002	Chicken	155	B1	5	15	11	45	4549	1725	2826	219
LN99	lab	3	2002	Chicken	155	B1	5	13	10	45	4510	1726	2786	207
LVOH	lab	3	2002	Pig	10	A	4	17	11	40	5060	1721	3341	367
LVOV	lab	3	2002	Pig	201	B1	5	12	14	42	4563	1726	2839	165
S153	lab	3	2002	Chicken	-	D	7	15	13	50	4597	1718	2881	287
X107	lab	3	2002	Chicken	1011	E	7	9	16	45	4402	1726	2678	209
GCA_001616105.1_ASM161610v1	lab	3	2003	Pig	23	C	2	14	9	41	4624	1712	2914	318
HGS1	lab	3	2003	Chicken	224	B1	5	10	15	36	4456	1726	2732	150
HPC12	lab	3	2003	Chicken	871	A	6	2	21	30	4193	1725	2470	120
HSC21	lab	3	2003	Chicken	162	B1	5	8	12	44	4417	1726	2693	217
LVOA	lab	3	2003	Pig	114	D	3	13	3	44	4772	1724	3050	186
SWP12	lab	3	2003	Chicken	155	B1	5	9	8	40	4307	1722	2587	209
WHC4	lab	3	2003	Chicken	95	B2	9	14	8	42	4970	1724	3248	120
ECGC3	lab	3	2004	Chicken	48	A	4	1	4	26	4231	1723	2510	10
EDWP4	lab	3	2004	Chicken	-	B1	5	10	8	44	4606	1726	2882	279
Eej2	lab	3	2004	Chicken	359	B1	5	13	14	43	4483	1726	2759	100
EGD13	lab	3	2004	Chicken	162	B1	5	8	12	44	4424	1726	2700	212
EZDK2	lab	3	2004	Chicken	219	E	7	16	5	52	4722	1725	2999	196
FDK22	lab	3	2004	Chicken	-	B1	5	0	4	42	4899	1726	3175	24
FSC3	lab	3	2004	Chicken	156	B1	5	7	20	43	4431	1724	2709	191
FSD3	lab	3	2004	Chicken	155	B1	5	9	8	40	4309	1726	2585	211
GCA_001615925.1_ASM161592v1	lab	3	2004	Pig	100	A	4	21	19	47	5194	1726	3470	630
HDC9	lab	3	2004	Chicken	156	B1	5	2	17	41	4407	1726	2683	166
JX1	lab	3	2004	Chicken	-	B1	5	12	13	42	4591	1726	2867	231
JX4	lab	3	2004	Chicken	155	B1	5	11	10	47	4473	1726	2749	198
SWZ22	lab	3	2004	Chicken	533	B1	5	14	13	38	4633	1725	2910	164
ZLP1	lab	3	2004	Chicken	58	B1	5	15	18	43	4759	1725	3036	165
ZLP12	lab	3	2004	Chicken	871	A	6	5	19	30	4134	1722	2414	214
ZLP13	lab	3	2004	Chicken	1011	D	7	15	16	49	4461	1726	2737	194
zlp18	lab	3	2004	Chicken	101	B1	5	13	17	42	4475	1726	2751	499
ZLP5	lab	3	2004	Chicken	155	B1	5	9	8	40	4282	1726	2558	236
ZLP7	lab	3	2004	Chicken	69	D	3	1	12	39	4582	1726	2858	35
P-103	lab	3	2005	Chicken	10	A	4	6	17	31	4392	1722	2672	29
P1-109	lab	3	2005	Chicken	10	A	4	12	21	32	4417	1726	2693	231
P1-2	lab	3	2005	Chicken	33	B1	5	27	11	52	4915	1726	3191	279
P1-59	lab	3	2005	Chicken	10	A	4	3	7	25	4293	1724	2571	195
P1-60	lab	3	2005	Chicken	210	B1	5	14	10	45	4867	1725	3144	213
P1-76	lab	3	2005	Chicken	877	B1	5	12	17	36	4519	1720	2801	226
P1-82	lab	3	2005	Chicken	793	A	4	5	14	57	4676	1719	2959	387
P1-85	lab	3	2005	Chicken	10	A	4	17	15	39	4346	1726	2622	149
Pg8	lab	3	2005	Chicken	1011	E	7	11	14	47	4482	1724	2760	250
Cnp7-24	lab	3	2006	Chicken	2628	B1	5	7	12	48	4713	1725	2990	84
Cnp7-8	lab	3	2006	Chicken	117	F	8	14	11	40	4619	1725	2896	173
LCD32	lab	3	2006	Chicken	224	B1	5	7	26	38	4599	1726	2875	460
LCD33	lab	3	2006	Chicken	1286	A	4	8	17	37	4611	1724	2889	217
LCD34	lab	3	2006	Chicken	352	B2	9	2	3	31	4497	1724	2775	106
LRGE	lab	3	2006	Pig	5147	D	3	0	6	56	4643	1719	2926	8
YJC10	lab	3	2006	Chicken	1290	A	4	17	17	36	4412	1726	2688	316
YJC15	lab	3	2006	Chicken	2847	E	7	19	17	51	4685	1724	2963	232
YJC2	lab	3	2006	Chicken	224	B1	5	6	14	39	4628	1726	2904	320
YJC80	lab	3	2006	Chicken	2847	E	7	19	17	51	4663	1724	2941	253
YJC9	lab	3	2006	Chicken	1290	A	4	4	25	31	4346	1725	2623	214
ExPEC-XM	lab	3	2007	Duck	95	B2	9	13	7	46	4896	1725	3173	311
LBBM	lab	3	2007	Duck	906	B1	5	12	25	33	4532	1711	2823	358
LFQP	lab	3	2007	Duck	224	B1	5	14	13	35	4675	1717	2960	193
GZC08-1	lab	3	2008	Chicken	117	F	8	21	12	42	4637	1726	2913	145
GZC08-10	lab	3	2008	Chicken	155	B1	5	14	9	44	4493	1725	2770	265
GZC08-12	lab	3	2008	Chicken	155	B1	5	14	9	44	4497	1726	2773	254
GZC08-14	lab	3	2008	Chicken	155	B1	5	14	9	44	4487	1726	2763	259
GZC08-16	lab	3	2008	Chicken	533	B1	5	10	7	38	4440	1726	2716	167
GZC08-18	lab	3	2008	Chicken	219	E	7	1	11	49	4496	1726	2772	109
GZC08-2	lab	3	2008	Chicken	224	B1	5	6	17	38	4532	1726	2808	152
GZC08-20	lab	3	2008	Chicken	48	A	4	2	18	31	4327	1724	2605	49
GZC08-4	NCBI	3	2008	Chicken	-	A	4	1	8	34	4395	1725	2672	8
GZC08-6	NCBI	3	2008	Chicken	1630	A	4	5	15	35	4297	1718	2581	255
GZC08-8	NCBI	3	2008	Chicken	2705	A	6	10	22	36	4416	1725	2693	159
GZP08-8	NCBI	3	2008	Pig	10	A	4	11	28	32	4484	1726	2760	359
GZP08-9	NCBI	3	2008	Pig	10	A	4	11	28	32	4503	1726	2779	340
09b17	NCBI	3	2009	Pig	29	B1	5	11	10	85	5010	1725	3287	239
09b19	NCBI	3	2009	Pig	524	D	7	12	19	68	4742	1720	3024	469
09b21	NCBI	3	2009	Pig	410	C	2	21	15	41	4519	1726	2795	292
09b23	NCBI	3	2009	Pig	29	B1	5	18	16	86	5032	1725	3309	474
09b25-2	NCBI	3	2009	Pig	10	A	4	5	23	32	4503	1726	2779	160
09b28	lab	3	2009	Pig	410	C	2	21	15	41	4521	1726	2797	284
09b31	lab	3	2009	Pig	10	A	4	15	17	26	4350	1724	2628	262
E.11-3-2009	NCBI	3	2009	Chicken	101	B1	5	13	17	42	4502	1726	2778	467
EDYC09-10	lab	3	2009	Chicken	69	D	3	17	19	42	4619	1726	2895	338
EDYC09-12	lab	3	2009	Chicken	1011	E	7	11	11	49	4474	1726	2750	146
EDYC09-18	lab	3	2009	Chicken	1140	E	7	18	19	38	4377	1725	2654	284
EDYC09-2	lab	3	2009	Chicken	1140	E	7	18	19	38	4396	1725	2673	265
EDYC09-21	lab	3	2009	Chicken	1140	E	7	18	19	38	4380	1724	2658	281
EDYC09-24	lab	3	2009	Chicken	4055	A	4	12	22	26	4232	1724	2510	277
EDYC09-5	lab	3	2009	Chicken	1011	E	7	11	11	49	4471	1726	2747	160
EDYC09-8	lab	3	2009	Chicken	1724	B1	5	12	11	38	4529	1726	2805	190
EK2009	lab	3	2009	Chicken	-	A	4	0	4	28	4282	1724	2560	1
GZC09-11	NCBI	3	2009	Chicken	2973	A	5	11	15	42	4502	1726	2778	340
GZC09-12	lab	3	2009	Chicken	533	B1	5	14	20	41	4590	1725	2867	223
GZC09-13	lab	3	2009	Chicken	354	F	1	10	21	45	4645	1725	2922	452
GZC09-14	lab	3	2009	Chicken	533	B1	5	14	20	41	4616	1725	2893	208
GZC09-15	lab	3	2009	Chicken	533	B1	5	14	20	41	4580	1725	2857	235
GZC09-18	lab	3	2009	Chicken	155	B1	5	13	11	39	4371	1724	2649	113
GZC09-2	lab	3	2009	Chicken	48	A	4	1	12	31	4248	1724	2526	69
GZC09-25	lab	3	2009	Chicken	361	A	6	9	10	40	4204	1724	2482	165
GZC09-4	lab	3	2009	Chicken	-	A	4	0	4	34	4353	1725	2630	6
GZC09-6	lab	3	2009	Chicken	297	D	5	11	5	44	4557	1726	2833	167
GZP09-19	lab	3	2009	Pig	10	A	4	3	25	32	4382	1726	2658	148
GZP09-22	lab	3	2009	Pig	10	A	4	7	25	31	4423	1726	2699	248
GZP09-23	lab	3	2009	Pig	10	A	4	1	17	32	4362	1725	2639	107
KR2009	lab	3	2009	Chicken	-	A	4	0	4	28	4284	1724	2562	1
TZ1	lab	3	2009	Chicken	1304	B1	5	0	5	38	4544	1726	2820	6
TZ10	lab	3	2009	Chicken	1251	A	4	14	15	35	4441	1724	2719	382
TZ11	lab	3	2009	Chicken	1304	B1	5	14	10	36	4427	1724	2705	189
TZ12	lab	3	2009	Chicken	1304	B1	5	14	10	41	4527	1724	2805	158
TZ2	lab	3	2009	Chicken	484	A	6	1	4	32	4320	1720	2602	46
TZ3	lab	3	2009	Chicken	1304	B1	5	16	10	41	4517	1724	2795	208
TZ5	lab	3	2009	Chicken	162	B1	5	15	11	47	4445	1725	2722	148
TZ7	lab	3	2009	Chicken	2165	B1	5	12	12	47	4617	1725	2894	202
TZ9	NCBI	3	2009	Chicken	1304	B1	5	0	5	38	4528	1726	2804	22
10c21	NCBI	4	2010	Chicken	93	A	6	13	14	39	4580	1723	2859	430
10c23	NCBI	4	2010	Chicken	2329	B1	5	6	9	39	4593	1725	2870	60
10c25	NCBI	4	2010	Chicken	155	B1	5	15	13	46	4531	1726	2807	376
10c28	NCBI	4	2010	Chicken	1011	D	7	12	27	45	4616	1726	2892	398
10c30	NCBI	4	2010	Chicken	-	B1	5	21	30	42	4670	1726	2946	491
10f39	NCBI	4	2010	Chicken	1415	A	4	2	13	33	4270	1724	2548	111
10f52	NCBI	4	2010	Chicken	-	A	6	2	5	31	4167	1723	2446	60
10f54	lab	4	2010	Chicken	1564	A	4	5	14	30	4458	1724	2736	43
10f56	lab	4	2010	Chicken	5853	D	3	13	9	40	4589	1720	2871	210
10f58	NCBI	4	2010	Chicken	10	A	4	2	5	33	4299	1725	2576	165
10f60	NCBI	4	2010	Chicken	46	A	6	11	9	28	4244	1726	2520	197
d6-5-1	NCBI	4	2010	Chicken	515	B1	6	9	4	29	4484	1726	2760	57
E1-2-1-15	NCBI	4	2010	Chicken	5702	B1	5	7	6	37	4498	1726	2774	107
E16-4-1-16	NCBI	4	2010	Chicken	5702	B1	5	7	6	37	4498	1726	2774	107
E6-3-1-16	NCBI	4	2010	Chicken	-	B1	5	1	4	39	4638	1726	2914	89
E8-1-1-16	NCBI	4	2010	Chicken	155	B1	5	7	8	40	4392	1726	2668	89
E9-2-1-15	lab	4	2010	Chicken	5702	B1	5	7	6	37	4484	1726	2760	129
Ed10-4-2	lab	4	2010	Chicken	349	D	3	10	8	50	4529	1725	2806	124
Ed12-3-1	lab	4	2010	Chicken	602	B1	5	9	4	45	4663	1726	2939	122
En3-4	lab	4	2010	Chicken	-	B1	5	14	4	38	4405	1726	2681	184
en6-1-1	lab	4	2010	Chicken	58	B1	5	12	4	46	4472	1726	2748	315
en7-1	lab	4	2010	Chicken	48	A	4	10	7	34	4351	1725	2628	126
EYAP10-115	NCBI	4	2010	Pig	-	A	4	9	24	31	4382	1723	2661	183
EYAP10-225	NCBI	4	2010	Pig	10	A	4	14	24	31	4354	1726	2630	224
EYAP10-258	NCBI	4	2010	Pig	-	cladeI	3	13	19	44	4728	1717	3013	261
EZYP10-11	NCBI	4	2010	Pig	10	A	4	5	24	31	4373	1726	2649	450
EZYP10-3	NCBI	4	2010	Pig	38	D	3	14	16	51	4808	1724	3086	226
GZC10-10	lab	4	2010	Chicken	1072	A	6	9	25	28	4569	1724	2847	396
GZC10-12	NCBI	4	2010	Chicken	453	B1	5	17	6	48	4514	1725	2791	295
GZC10-13	NCBI	4	2010	Chicken	29	B1	5	16	21	87	5117	1726	3393	581
GZC10-14	NCBI	4	2010	Chicken	162	B1	5	21	17	48	4489	1725	2766	323
GZC10-17	lab	4	2010	Chicken	453	B1	5	17	6	48	4544	1725	2821	268
GZC10-4	lab	4	2010	Chicken	539	B1	5	11	16	43	4603	1726	2879	331
GZC10-6	lab	4	2010	Chicken	1196	B1	5	10	16	37	4345	1726	2621	354
GZC10-8	NCBI	4	2010	Chicken	539	B1	5	11	16	43	4573	1726	2849	371
GZP10-10	NCBI	4	2010	Pig	29	B1	5	16	21	87	5129	1726	3405	558
GZP10-11	NCBI	4	2010	Pig	29	B1	5	14	20	86	5140	1726	3416	485
GZP10-13	NCBI	4	2010	Pig	29	B1	5	15	23	87	5144	1726	3420	529
GZP10-8	NCBI	4	2010	Pig	29	B1	5	15	23	87	5142	1726	3418	533
11a2	NCBI	4	2011	Chicken	354	F	1	21	20	46	4911	1726	3187	552
11a3	NCBI	4	2011	Chicken	354	F	1	15	19	45	4946	1726	3222	374
11a5	NCBI	4	2011	Chicken	354	F	1	21	20	46	4902	1726	3178	550
11a6	NCBI	4	2011	Chicken	354	F	1	14	19	45	4921	1726	3197	458
11a9	NCBI	4	2011	Chicken	354	F	1	20	19	46	4921	1726	3197	541
11b11	NCBI	4	2011	Pig	58	B1	5	16	24	41	4454	1725	2731	327
11b12	NCBI	4	2011	Pig	716	A	4	24	22	34	4699	1720	2981	314
11b4	NCBI	4	2011	Pig	1494	A	5	12	21	23	4201	1721	2482	249
11b7	lab	4	2011	Pig	165	A	4	14	24	37	4730	1724	3008	501
11c13	lab	4	2011	Chicken	10	A	4	14	17	32	4360	1721	2641	288
11c22	lab	4	2011	Chicken	10	A	4	13	13	36	4796	1725	3073	249
11C26	NCBI	4	2011	Chicken	971	B1	5	20	12	52	4941	1725	3218	249
11c5	NCBI	4	2011	Chicken	48	A	4	5	12	30	4347	1724	2625	159
11d8	NCBI	4	2011	Pig	877	B1	5	3	13	34	4369	1721	2650	112
11f1	lab	4	2011	Chicken	1158	E	3	15	16	52	4905	1724	3183	376
11f2	lab	4	2011	Chicken	1201	A	6	19	17	41	4669	1724	2947	324
11f4	lab	4	2011	Chicken	1158	E	3	15	16	52	4914	1724	3192	388
11f5	lab	4	2011	Chicken	2309	D	3	18	17	54	5023	1725	3300	345
11f7	lab	4	2011	Chicken	354	F	1	13	15	47	4983	1726	3259	306
11f8	lab	4	2011	Chicken	48	A	4	20	16	39	5098	1724	3376	460
CF10	lab	4	2011	Chicken	1011	E	7	11	23	45	4423	1726	2699	426
E.CRLD04-2011	NCBI	4	2011	Chicken	533	B1	5	14	20	41	4596	1725	2873	216
ECRLC09	NCBI	4	2011	Chicken	58	B1	5	9	20	44	4529	1722	2809	137
GZC11-1	NCBI	4	2011	Chicken	1426	C	2	17	19	40	4630	1721	2911	253
GZC11-5	NCBI	4	2011	Chicken	1426	C	2	17	19	40	4609	1720	2891	275
GZC11-6	lab	4	2011	Chicken	101	B1	5	13	17	42	4462	1726	2738	516
GZP11-11	lab	4	2011	Pig	3628	A	4	16	19	32	4915	1724	3193	288
GZP11-15	NCBI	4	2011	Pig	34	A	4	4	17	33	4426	1723	2705	85
GZP11-18	NCBI	4	2011	Pig	46	A	6	13	7	28	4241	1724	2519	213
GZP11-5	NCBI	4	2011	Pig	34	A	4	2	11	33	4393	1723	2672	48
GZP11-6	NCBI	4	2011	Pig	218	A	4	14	23	37	4306	1714	2594	383
GZP11-9	NCBI	4	2011	Pig	3628	A	4	25	25	39	5238	1706	3534	441
JNBX	NCBI	4	2011	Pig	100	A	4	9	7	40	5080	1726	3356	371
LVLU	NCBI	4	2011	Cattle	155	B1	5	18	14	47	4527	1723	2806	229
LVLV	NCBI	4	2011	Cattle	117	F	8	17	16	39	4473	1711	2764	492
LVLW	NCBI	4	2011	Cattle	10	A	4	14	18	35	4530	1726	2806	485
LVLX	NCBI	4	2011	Cattle	117	F	8	11	15	39	4637	1725	2914	200
LVLY	NCBI	4	2011	Cattle	162	B1	5	20	17	46	4556	1726	2832	264
LVLZ	NCBI	4	2011	Cattle	540	A	6	8	14	35	4314	1725	2591	128
LVMA	NCBI	4	2011	Cattle	154	B1	5	11	4	42	4463	1725	2740	149
LVMB	NCBI	4	2011	Cattle	10	A	4	10	5	39	4450	1726	2726	108
LVMC	NCBI	4	2011	Cattle	117	F	8	9	18	41	4767	1725	3044	374
NC11-62	NCBI	4	2011	Chicken	58	B1	5	10	5	41	4809	1725	3086	126
sc11-16	NCBI	4	2011	Chicken	2309	D	3	20	17	54	5038	1726	3314	538
sc11-18	NCBI	4	2011	Chicken	224	B1	5	12	4	42	4530	1726	2806	130
sc11-20	NCBI	4	2011	Chicken	224	B1	5	12	4	42	4548	1726	2824	111
sc11-23	NCBI	4	2011	Chicken	1642	B1	5	15	11	43	4517	1726	2793	344
sc11-25	NCBI	4	2011	Chicken	1642	B1	5	15	11	43	4569	1726	2845	290
sc11-29	NCBI	4	2011	Chicken	10	A	4	17	19	42	4690	1726	2966	364
sc11-30	NCBI	4	2011	Chicken	10	A	4	17	19	42	4666	1726	2942	361
SC11-31	NCBI	4	2011	Pig	877	B1	5	18	16	34	4310	1718	2594	300
SC11-32	NCBI	4	2011	Pig	10	A	4	17	19	42	4684	1726	2960	335
SC11-33	NCBI	4	2011	Pig	-	A	4	16	26	40	4629	1726	2905	502
SC11-35	NCBI	4	2011	Pig	10	A	4	13	16	32	4315	1725	2592	149
SC11-36	NCBI	4	2011	Pig	10	A	4	12	16	32	4332	1725	2609	122
SC11-38	NCBI	4	2011	Pig	10	A	4	17	20	40	4670	1726	2946	350
sc11-46	lab	4	2011	Chicken	70	D	3	17	7	45	4433	1726	2709	182
sc11-49	lab	4	2011	Chicken	2165	B1	5	17	21	47	4434	1725	2711	403
sc11-51	NCBI	4	2011	Chicken	533	B1	5	15	16	39	4718	1726	2994	286
sc11-55	lab	4	2011	Chicken	6858	F	1	16	8	44	4667	1723	2946	226
12a1	NCBI	4	2012	Pig	46	A	6	11	9	28	4238	1726	2514	206
12a4	NCBI	4	2012	Pig	218	A	4	14	23	37	4295	1714	2583	394
12a5	NCBI	4	2012	Pig	218	A	4	14	23	37	4305	1714	2593	384
12b1	NCBI	4	2012	Chicken	6712	A	6	19	13	49	4654	1719	2937	436
12b3	NCBI	4	2012	Chicken	46	A	6	3	9	28	4237	1726	2513	126
12b4	NCBI	4	2012	Chicken	93	A	6	18	12	42	4643	1722	2923	336
12c1	NCBI	4	2012	Chicken	101	B1	5	14	11	41	4461	1724	2739	187
12c11	NCBI	4	2012	Chicken	1589	B1	5	13	22	44	4514	1726	2790	551
12c2	NCBI	4	2012	Chicken	46	A	6	10	9	28	4243	1726	2519	153
12c20	NCBI	4	2012	Chicken	2165	B1	5	13	11	44	4447	1725	2724	196
12c24	NCBI	4	2012	Chicken	155	B1	5	2	15	43	4464	1726	2740	132
12c4	NCBI	4	2012	Chicken	1011	D	7	13	15	48	4617	1725	2894	240
12c5	NCBI	4	2012	Chicken	1286	A	4	8	17	37	4602	1724	2880	215
12c6	NCBI	4	2012	Chicken	155	B1	5	13	19	42	4423	1725	2700	393
12c7	NCBI	4	2012	Chicken	1286	A	4	7	17	37	4604	1724	2882	212
12c8	NCBI	4	2012	Chicken	1286	A	4	8	17	37	4578	1724	2856	243
12d1	NCBI	4	2012	Pig	46	A	6	11	9	28	4241	1726	2517	197
12d3	NCBI	4	2012	Pig	46	A	6	11	9	28	4232	1726	2508	206
12d5	NCBI	4	2012	Pig	101	B1	5	18	14	44	4528	1725	2805	396
12d7	NCBI	4	2012	Chicken	101	B1	5	17	17	46	4583	1725	2860	343
12e5	lab	4	2012	Pig	101	B1	5	18	14	44	4530	1725	2807	390
12f2	NCBI	4	2012	Chicken	57	E	7	14	14	50	4698	1720	2980	194
12f3	lab	4	2012	Chicken	533	B1	5	13	9	37	4775	1726	3051	190
12f4	lab	4	2012	Chicken	46	A	6	11	9	28	4238	1726	2514	202
12f5	lab	4	2012	Chicken	533	B1	5	9	9	40	4672	1726	2948	183
12f5-old	lab	4	2012	Chicken	46	A	6	11	9	28	4253	1726	2529	200
12f7	NCBI	4	2012	Chicken	46	A	6	11	9	28	4237	1725	2514	203
12f9	NCBI	4	2012	Chicken	1290	A	4	17	15	40	4405	1726	2681	226
cq9	NCBI	4	2012	Pig	88	C	2	15	21	50	4885	1725	3162	827
GCA_001615565.1_ASM161556v1	NCBI	4	2012	Pig	10	A	4	10	25	35	4380	1726	2656	355
GCA_001615595.1_ASM161559v1	NCBI	4	2012	Pig	744	A	4	8	19	33	4382	1726	2658	87
GCA_001615625.1_ASM161562v1	NCBI	4	2012	Pig	100	A	4	15	13	43	5183	1726	3459	447
GCA_001615675.1_ASM161567v1	NCBI	4	2012	Pig	410	C	2	17	12	38	4505	1726	2781	94
GCA_001615705.1_ASM161570v1	NCBI	4	2012	Pig	-	B1	5	11	14	37	4422	1726	2698	109
GCA_001615745.1_ASM161574v1	NCBI	4	2012	Pig	2496	A	4	1	16	28	4294	1725	2571	109
GCA_001615855.1_ASM161585v1	NCBI	4	2012	Pig	1011	D	7	13	11	47	4616	1726	2892	101
GCA_001615865.1_ASM161586v1	NCBI	4	2012	Pig	-	A	5	15	18	37	4591	1726	2867	95
GCA_001615915.1_ASM161591v1	NCBI	4	2012	Pig	-	A	4	5	23	40	4452	1725	2729	84
GCA_001615955.1_ASM161595v1	NCBI	4	2012	Pig	58	B1	5	16	18	42	4611	1723	2890	181
GCA_001615975.1_ASM161597v1	NCBI	4	2012	Pig	5215	A	4	13	20	33	4301	1721	2582	166
GCA_001615985.1_ASM161598v1	NCBI	4	2012	Pig	746	A	4	10	10	29	4379	1724	2657	225
GCA_001616055.1_ASM161605v1	NCBI	4	2012	Pig	744	A	4	8	17	33	4402	1726	2678	87
GCA_001616135.1_ASM161613v1	NCBI	4	2012	Pig	3321	B1	5	13	17	38	4587	1726	2863	168
GCA_001616275.1_ASM161627v1	NCBI	4	2012	Pig	56	B1	5	20	16	42	4451	1726	2727	243
GCA_001616285.1_ASM161628v1	NCBI	4	2012	Pig	405	D	3	7	18	46	4778	1723	3057	133
GCA_001616385.1_ASM161638v1	NCBI	4	2012	Pig	410	C	2	14	19	40	4460	1726	2736	122
GZC12-1	NCBI	4	2012	Chicken	2526	B1	5	8	15	36	4575	1726	2851	85
GZC12-13	NCBI	4	2012	Chicken	93	A	6	15	25	37	4870	1717	3155	543
GZC12-18	NCBI	4	2012	Chicken	155	B1	5	12	17	47	4479	1726	2755	263
GZC12-20	NCBI	4	2012	Chicken	1642	B1	5	19	17	39	4421	1726	2697	393
GZP12-13	NCBI	4	2012	Pig	34	A	4	12	19	33	4434	1723	2713	242
LVNG	NCBI	4	2012	Pig	405	D	3	9	18	46	4693	1722	2973	190
LVNI	NCBI	4	2012	Pig	542	A	4	14	11	32	4392	1726	2668	141
LVNO	NCBI	4	2012	Pig	2608	A	6	4	18	29	4174	1723	2453	57
LVNP	NCBI	4	2012	Pig	1642	B1	5	9	17	40	4851	1724	3129	338
LVNQ	NCBI	4	2012	Pig	405	D	3	8	8	48	4671	1724	2949	208
LVOD	lab	4	2012	Pig	1421	A	6	5	20	30	4207	1724	2485	105
LVOE	lab	4	2012	Pig	4214	A	4	15	21	34	4887	1724	3165	454
LVOJ	lab	4	2012	Pig	1642	B1	5	2	13	37	4412	1726	2688	101
LVOK	lab	4	2012	Pig	744	A	4	8	19	33	4400	1726	2676	83
LVOL	lab	4	2012	Pig	100	A	4	17	17	39	5161	1725	3438	312
LVOP	lab	4	2012	Pig	457	F	1	2	20	42	4651	1723	2930	158
LVOQ	lab	4	2012	Pig	354	F	1	6	12	44	4444	1724	2722	73
LVOR	lab	4	2012	Pig	4214	A	4	16	23	39	4897	1724	3175	466
LVOW	lab	4	2012	Sheep	392	B1	5	13	4	47	4835	1724	3113	161
LVOX	lab	4	2012	Sheep	56	B1	5	10	5	47	4520	1726	2796	120
LVOZ	lab	4	2012	Sheep	13	B1	5	13	4	55	5089	1726	3365	368
LVPA	lab	4	2012	Sheep	675	B1	5	12	4	47	4914	1724	3192	154
LVPB	lab	4	2012	Sheep	392	B1	5	14	4	47	4838	1723	3117	234
QEUG	lab	4	2012	Chicken	2505	C	2	22	13	40	4494	1725	2771	282
sc12-100	lab	4	2012	Chicken	101	B1	5	18	14	42	4474	1726	2750	312
sc12-57	lab	4	2012	Chicken	-	E	7	15	20	41	4548	1724	2826	299
sc12-62	lab	4	2012	Chicken	93	A	6	10	12	38	4499	1724	2777	290
sc12-65	lab	4	2012	Chicken	-	E	7	16	20	41	4569	1724	2847	274
sc12-67	lab	4	2012	Chicken	-	E	7	18	20	49	5073	1726	3349	371
sc12-70	lab	4	2012	Chicken	101	B1	5	18	28	41	4357	1726	2633	509
sc12-74	lab	4	2012	Chicken	1670	D	3	0	10	50	4568	1725	2845	3
sc12-81	NCBI	4	2012	Chicken	1266	E	7	8	23	48	4711	1726	2987	310
sc12-91	NCBI	4	2012	Chicken	3014	A	6	14	21	32	4320	1726	2596	346
sc12-92	NCBI	4	2012	Chicken	101	B1	5	15	20	34	4526	1726	2802	501
sc12-93	NCBI	4	2012	Chicken	101	B1	5	13	17	48	4549	1724	2827	255
sc12-96	NCBI	4	2012	Chicken	101	B1	5	13	20	37	4367	1726	2643	190
sc12-97	NCBI	4	2012	Chicken	156	B1	5	11	19	42	4407	1726	2683	215
sc12-98	NCBI	4	2012	Chicken	156	B1	5	9	8	42	4359	1726	2635	141
sc12-99	NCBI	4	2012	Chicken	1011	D	7	12	26	49	4586	1726	2862	338
13a2	NCBI	4	2013	Pig	46	A	6	11	9	28	4235	1725	2512	216
13b2	NCBI	4	2013	Chicken	46	A	6	0	4	28	4199	1725	2476	33
13b3	NCBI	4	2013	Chicken	48	A	4	9	18	37	5060	1724	3338	326
13b5	NCBI	4	2013	Chicken	4937	A	4	11	14	39	4724	1725	3001	325
13c3	NCBI	4	2013	Pig	744	A	4	20	25	34	4290	1726	2566	210
13d1	NCBI	4	2013	Pig	46	A	6	11	9	28	4247	1726	2523	199
13d2	NCBI	4	2013	Pig	46	A	6	11	9	28	4245	1726	2521	199
13e3	NCBI	4	2013	Chicken	1431	B1	5	13	13	47	4520	1715	2807	305
13e4	NCBI	4	2013	Chicken	1431	B1	5	12	12	48	4480	1726	2756	309
13e5	NCBI	4	2013	Chicken	1431	B1	5	12	12	48	4488	1726	2764	300
13f2	NCBI	4	2013	Chicken	29	B1	5	15	23	91	5165	1726	3441	455
13f3	NCBI	4	2013	Pig	46	A	6	11	9	28	4239	1726	2515	208
13f4	NCBI	4	2013	Pig	10	A	4	16	22	34	4764	1724	3042	240
13f5-2	NCBI	4	2013	Pig	5702	B1	5	7	15	36	4486	1726	2762	154
13h1	NCBI	4	2013	Chicken	542	A	4	6	13	32	4290	1722	2570	33
13h2	NCBI	4	2013	Chicken	46	A	6	11	9	28	4227	1726	2503	213
13h3	NCBI	4	2013	Chicken	29	B1	5	15	23	86	5100	1726	3376	459
13h4	NCBI	4	2013	Chicken	542	A	4	7	13	32	4295	1722	2575	33
13h5	NCBI	4	2013	Chicken	10	A	4	3	23	31	4392	1725	2669	229
13J3	NCBI	4	2013	Chicken	29	B1	5	15	26	86	5193	1720	3475	420
13j4	NCBI	4	2013	Chicken	46	A	6	11	9	28	4241	1726	2517	171
13j6	NCBI	4	2013	Chicken	46	A	6	3	9	28	4220	1726	2496	123
13j7	NCBI	4	2013	Chicken	29	B1	5	16	26	89	5180	1720	3462	499
BBZ2-6	NCBI	4	2013	Chicken	533	B1	5	13	7	42	4568	1726	2844	138
E.hw1-5f	NCBI	4	2013	Chicken	224	B1	5	18	16	43	4605	1726	2881	331
Eqsg1-4g	NCBI	4	2013	Chicken	10	A	4	16	26	36	4472	1722	2752	512
Eqsg1-5f	NCBI	4	2013	Chicken	5229	B1	5	11	18	41	4590	1726	2866	318
Eqsg1-6	NCBI	4	2013	Chicken	354	F	1	19	20	47	4766	1726	3042	706
EXF1-6-2013	NCBI	4	2013	Chicken	2309	D	3	19	27	55	5076	1722	3356	637
EZZ1-6	NCBI	4	2013	Chicken	2309	D	3	19	30	52	4946	1726	3222	756
GZC13-14	NCBI	4	2013	Chicken	2599	B1	5	13	15	46	4480	1726	2756	103
GZC13-24	NCBI	4	2013	Chicken	10	A	4	7	12	27	4529	1723	2808	166
GZC13-7	NCBI	4	2013	Chicken	90	C	2	17	13	44	4545	1725	2822	262
GZP13-1	NCBI	4	2013	Pig	101	B1	5	13	17	42	4496	1726	2772	475
GZP13-4	NCBI	4	2013	Pig	1196	B1	5	19	15	42	4460	1726	2736	303
GZP13-6	NCBI	4	2013	Pig	10	A	4	5	14	29	4557	1722	2837	234
LVOY	NCBI	4	2013	Sheep	58	B1	5	13	6	49	4452	1726	2728	138
LVPC	NCBI	4	2013	Sheep	602	B1	5	12	5	45	4637	1726	2913	299
LVPD	NCBI	4	2013	Sheep	602	B1	5	12	5	45	4626	1726	2902	307
LVPE	NCBI	4	2013	Sheep	23	C	2	9	5	45	4696	1726	2972	223
LVPF	NCBI	4	2013	Sheep	-	B1	5	11	4	44	4541	1726	2817	112
LVPG	NCBI	4	2013	Sheep	40	B1	5	16	4	43	4732	1725	3009	338
LVPH	lab	4	2013	Sheep	602	B1	5	10	4	45	4446	1726	2722	222
LVPI	lab	4	2013	Sheep	58	B1	5	11	4	43	4549	1726	2825	166
LVPJ	lab	4	2013	Sheep	23	C	2	7	4	45	4697	1726	2973	139
LVPK	lab	4	2013	Sheep	58	B1	5	11	4	43	4743	1726	3019	167
LVPL	lab	4	2013	Sheep	-	B1	5	11	4	46	4540	1722	2820	115
LVPM	lab	4	2013	Sheep	73	B2	9	2	3	46	4739	1720	3021	8
LVPN	lab	4	2013	Sheep	-	B1	5	12	4	46	4548	1722	2828	182
LVPO	NCBI	4	2013	Sheep	-	B1	5	11	4	46	4547	1723	2826	112
LVPP	NCBI	4	2013	Sheep	3285	B1	5	9	4	42	4455	1726	2731	105
LVPQ	NCBI	4	2013	Sheep	-	B1	5	11	4	46	4530	1726	2806	107
LVPR	NCBI	4	2013	Sheep	-	B1	5	11	4	46	4542	1722	2822	110
LVPS	NCBI	4	2013	Sheep	13	B1	5	13	4	51	4960	1722	3240	265
LVPT	NCBI	4	2013	Sheep	278	B1	5	7	4	48	4708	1726	2984	126
LVPU	NCBI	4	2013	Sheep	501	D	3	14	3	49	4773	1724	3051	189
LVPV	NCBI	4	2013	Sheep	501	D	3	14	3	49	4779	1724	3057	188
LVPW	NCBI	4	2013	Sheep	25	B1	5	5	4	48	4923	1726	3199	293
LVPX	NCBI	4	2013	Sheep	29	B1	5	6	4	86	5042	1726	3318	330
LVPY	NCBI	4	2013	Sheep	48	A	4	10	20	31	4299	1726	2575	70
LVPZ	NCBI	4	2013	Sheep	13	B1	5	13	4	51	5025	1722	3305	263
LVQA	NCBI	4	2013	Sheep	13	B1	5	13	4	51	4990	1722	3270	258
LVQB	NCBI	4	2013	Sheep	17	B1	5	12	5	81	5197	1726	3473	187
LVQC	NCBI	4	2013	Sheep	744	A	4	21	12	38	4343	1726	2619	277
LVQD	NCBI	4	2013	Sheep	-	B1	5	11	11	42	4394	1726	2670	145
LVQE	NCBI	4	2013	Sheep	744	A	4	21	11	38	4339	1725	2616	228
LVQF	NCBI	4	2013	Sheep	58	B1	5	13	6	49	4441	1726	2717	133
LVQG	NCBI	4	2013	Sheep	746	A	4	3	18	27	4264	1725	2541	189
LVQH	NCBI	4	2013	Sheep	746	A	4	7	17	30	4316	1725	2593	175
LVQI	NCBI	4	2013	Sheep	746	A	4	1	6	30	4259	1725	2536	83
LVQL	NCBI	4	2013	Sheep	3234	B1	5	0	4	42	4493	1726	2769	6
LVQM	NCBI	4	2013	Sheep	58	B1	5	10	4	50	4684	1726	2960	114
LVQN	NCBI	4	2013	Sheep	29	B1	5	5	4	86	5109	1726	3385	332
LVQO	NCBI	4	2013	Sheep	58	B1	5	13	6	49	4445	1726	2721	134
LVQP	NCBI	4	2013	Sheep	3234	B1	5	0	4	42	4486	1725	2763	6
LVQQ	NCBI	4	2013	Sheep	641	B1	5	3	4	37	4456	1726	2732	86
LVQR	NCBI	4	2013	Sheep	602	B1	5	22	18	46	4617	1725	2894	384
LVQS	NCBI	4	2013	Sheep	641	B1	5	3	4	37	4463	1726	2739	85
LVQT	NCBI	4	2013	Sheep	29	B1	5	6	4	86	5055	1726	3331	336
LVQU	NCBI	4	2013	Sheep	3234	B1	5	0	4	42	4488	1725	2765	6
LVQV	NCBI	4	2013	Sheep	-	B1	5	0	4	39	4434	1725	2711	3
LVQW	NCBI	4	2013	Sheep	602	B1	5	10	4	45	4482	1726	2758	202
LVQX	NCBI	4	2013	Sheep	17	B1	5	12	4	82	5321	1726	3597	148
NC3-1-2013	NCBI	4	2013	Chicken	1011	D	7	11	31	53	4692	1723	2971	186
PU-1	NCBI	4	2013	Pig	95	B2	9	13	7	46	4846	1726	3122	295
QETP	NCBI	4	2013	Chicken	4753	E	7	22	15	54	4778	1726	3054	429
QETT	NCBI	4	2013	Chicken	2111	B1	5	0	4	40	4384	1726	2660	9
sc13-121	NCBI	4	2013	Chicken	48	A	4	14	11	32	4382	1724	2660	134
SRR6067070	NCBI	4	2013	Chicken	-	C	2	16	24	42	4607	1726	2883	523
SRR6067071	NCBI	4	2013	Chicken	117	F	8	19	22	42	4514	1725	2791	248
SRR6067090	NCBI	4	2013	Chicken	359	B1	5	16	19	47	4511	1725	2788	327
SRR6067091	NCBI	4	2013	Chicken	6756	A	4	19	19	44	4532	1705	2829	304
SRR6067092	NCBI	4	2013	Chicken	-	B1	5	16	20	45	4399	1668	2733	332
SRR6067093	NCBI	4	2013	Chicken	359	B1	5	16	20	48	4537	1726	2813	314
XF1-3f	NCBI	4	2013	Chicken	93	A	6	9	19	37	4527	1724	2805	438
XF1-3g	NCBI	4	2013	Chicken	542	A	4	6	25	32	4258	1724	2536	288
ZZ1-5g	NCBI	4	2013	Chicken	48	A	4	14	22	37	4403	1726	2679	407
446_c	NCBI	4	2014	Chicken	101	B1	5	22	26	42	4685	1726	2961	418
447_c	NCBI	4	2014	Chicken	101	B1	5	24	26	42	4725	1725	3002	541
448_c	NCBI	4	2014	Chicken	6388	B1	5	12	23	44	4537	1726	2813	448
449_c	NCBI	4	2014	Chicken	6388	B1	5	14	22	44	4599	1726	2875	343
450_c	NCBI	4	2014	Chicken	101	B1	5	14	17	41	4775	1726	3051	291
451_c	NCBI	4	2014	Chicken	6388	B1	5	19	24	43	4646	1722	2926	443
452_c	NCBI	4	2014	Chicken	457	F	1	20	33	44	4881	1721	3162	602
453_c	NCBI	4	2014	Chicken	101	B1	5	26	22	43	4797	1726	3073	588
454_c	NCBI	4	2014	Chicken	156	B1	5	15	19	48	4631	1726	2907	379
455_c	NCBI	4	2014	Chicken	617	A	4	15	30	40	4555	1726	2831	507
558_c	NCBI	4	2014	Chicken	101	B1	5	19	26	45	4978	1726	3254	463
576_c	NCBI	4	2014	Chicken	101	B1	5	13	22	41	4690	1725	2967	499
587_c	NCBI	4	2014	Chicken	101	B1	5	15	25	44	4727	1726	3003	404
615_c	NCBI	4	2014	Chicken	156	B1	5	3	26	46	4691	1724	2969	291
616_c	NCBI	4	2014	Chicken	101	B1	5	16	25	44	4736	1726	3012	435
617_c	NCBI	4	2014	Chicken	156	B1	5	5	29	46	4816	1725	3093	322
619_c	lab	4	2014	Chicken	224	B1	5	21	20	45	5179	1725	3456	418
620_c	lab	4	2014	Chicken	156	B1	5	15	19	50	4679	1726	2955	399
674_c	lab	4	2014	Chicken	101	B1	5	16	25	44	4709	1726	2985	432
694_c	lab	4	2014	Chicken	101	B1	5	16	25	46	4767	1726	3043	413
705_c	lab	4	2014	Chicken	101	B1	5	16	19	42	4836	1726	3112	362
8#19.27	lab	4	2014	Chicken	5229	B1	5	11	18	41	4575	1726	2851	331
8#2-10.2	lab	4	2014	Chicken	156	B1	5	21	31	46	4738	1726	3014	584
E.10.7.8#1	lab	4	2014	Chicken	648	F	1	12	20	47	4718	1725	2995	408
E8#1-10.2	lab	4	2014	Chicken	617	A	4	14	23	40	4551	1726	2827	453
GCA_001615355.1_ASM161535v1	lab	4	2014	Pig	4214	A	4	4	16	35	4721	1679	3044	287
GCA_001615395.1_ASM161539v1	lab	4	2014	Pig	10	A	4	3	16	35	4405	1713	2694	44
GCA_001615405.1_ASM161540v1	lab	4	2014	Pig	-	A	4	2	15	27	4196	1622	2576	225
GCA_001615415.1_ASM161541v1	lab	4	2014	Pig	-	A	4	5	14	33	4786	1673	3115	263
HNK130	lab	4	2014	Chicken	1060	A	4	3	15	34	4295	1723	2574	219
LJCG	lab	4	2014	Pig	88	C	2	14	14	38	4537	1714	2825	65
LVMZ	lab	4	2014	Pig	88	C	2	18	19	33	4912	1702	3212	562
LVQJ	lab	4	2014	Sheep	48	A	4	1	7	33	4307	1726	2583	120
LVQK	lab	4	2014	Sheep	4204	A	4	4	11	38	4436	1725	2713	138
MOKX	lab	4	2014	Chicken	156	B1	5	21	31	43	4622	1726	2898	558
MOKY	lab	4	2014	Chicken	359	B1	5	22	18	42	4674	1726	2950	518
MOLH	lab	4	2014	Chicken	354	F	1	20	23	43	4743	1726	3019	491
QETO	NCBI	4	2014	Pig	23	C	2	14	4	38	4503	1725	2780	112
QETQ	NCBI	4	2014	Cattle	548	A	4	0	4	34	4308	1726	2584	1
QETR	NCBI	4	2014	Cattle	-	A	6	2	5	35	4370	1726	2646	25
QETS	NCBI	4	2014	Cattle	5019	A	6	6	12	37	4449	1722	2729	95
QETU	NCBI	4	2014	Pig	23	C	2	21	15	42	4647	1725	2924	534
QETV	NCBI	4	2014	Chicken	155	B1	5	0	4	45	4413	1721	2694	1
QETW	NCBI	4	2014	Cattle	602	B1	5	16	13	43	4781	1726	3057	235
QETX	NCBI	4	2014	Chicken	6856	A	4	6	15	30	4287	1726	2563	221
QETY	NCBI	4	2014	Pig	155	B1	5	12	14	40	4701	1721	2982	180
QETZ	NCBI	4	2014	Pig	4012	A	6	10	17	32	4344	1726	2620	382
QEUA	NCBI	4	2014	Pig	3345	A	6	10	10	38	4554	1722	2834	248
QEUB	NCBI	4	2014	Chicken	10	A	4	5	24	31	4365	1725	2642	263
QEUC	NCBI	4	2014	Chicken	155	B1	5	13	18	39	4426	1726	2702	483
QEUD	NCBI	4	2014	Chicken	297	D	5	0	5	45	4483	1726	2759	1
QEUE	NCBI	4	2014	Chicken	656	A	4	11	23	35	4488	1725	2765	278
QEUF	NCBI	4	2014	Chicken	746	A	4	17	21	33	4555	1721	2836	243
sc14-175	NCBI	4	2014	Chicken	1589	B1	5	13	13	41	4452	1720	2734	120
sc14-184	NCBI	4	2014	Chicken	93	A	6	13	6	38	4467	1725	2744	177
sc14-186	NCBI	4	2014	Chicken	48	A	4	11	9	31	4152	1725	2429	145
sc14-188	NCBI	4	2014	Chicken	101	B1	5	13	17	42	4435	1724	2713	539
sc14-202	NCBI	4	2014	Chicken	1286	A	4	16	17	36	4467	1726	2743	158
sc14-203	NCBI	4	2014	Chicken	117	F	8	16	7	42	4538	1725	2815	327
sc14-204	NCBI	4	2014	Chicken	165	A	4	19	10	32	4652	1718	2936	285
sc14-205	NCBI	4	2014	Chicken	10	A	4	0	4	27	4238	1721	2519	2
sc14-211	NCBI	4	2014	Pig	10	A	4	5	14	29	4520	1726	2796	267
sc14-212	NCBI	4	2014	Pig	10	A	4	5	14	29	4562	1726	2838	227
sc14-213	NCBI	4	2014	Pig	542	A	4	8	19	27	4469	1726	2745	124
sc14-215	NCBI	4	2014	Pig	10	A	4	4	14	29	4512	1726	2788	265
sc14-216	NCBI	4	2014	Pig	10	A	4	8	13	30	4735	1723	3014	190
sc14-217	NCBI	4	2014	Pig	542	A	4	8	19	27	4492	1726	2768	108
sc14-218	NCBI	4	2014	Pig	10	A	4	4	14	29	4505	1722	2785	249
sc14-219	NCBI	4	2014	Pig	46	A	6	11	9	28	4248	1726	2524	200
sc14-220	NCBI	4	2014	Pig	101	B1	5	13	17	42	4486	1726	2762	489
444	NCBI	4	2015	Chicken	617	A	4	23	31	44	4908	1726	3184	683
570	NCBI	4	2015	Chicken	2732	D	3	24	21	51	4981	1725	3258	504
613	NCBI	4	2015	Chicken	156	B1	5	7	29	47	4801	1725	3078	469
614	lab	4	2015	Chicken	6397	F	1	16	27	40	4546	1725	2823	511
457_c	lab	4	2015	Chicken	101	B1	5	16	27	42	4735	1725	3012	458
458_c	lab	4	2015	Chicken	6391	A	4	20	18	29	4323	1725	2600	594
459_c	lab	4	2015	Chicken	162	B1	5	18	21	51	4590	1725	2867	378
460_c	lab	4	2015	Chicken	101	B1	5	18	27	42	4748	1725	3025	492
461_c	lab	4	2015	Chicken	354	F	1	15	31	44	4644	1726	2920	758
462_c	lab	4	2015	Chicken	226	A	4	23	17	34	4556	1723	2835	433
463_c	lab	4	2015	Chicken	617	A	4	22	21	40	4763	1724	3041	505
464_c	lab	4	2015	Chicken	156	B1	5	5	29	46	4698	1725	2975	377
465_c	lab	4	2015	Chicken	156	B1	5	5	29	46	4707	1725	2984	370
466_c	lab	4	2015	Chicken	156	B1	5	5	29	46	4715	1725	2992	367
467_c	lab	4	2015	Chicken	156	B1	5	5	25	46	4705	1726	2981	292
471_c	NCBI	4	2015	Chicken	156	B1	5	20	24	52	4553	1726	2829	604
472_c	NCBI	4	2015	Chicken	2732	D	3	25	25	52	4642	1723	2921	460
473_c	NCBI	4	2015	Chicken	226	A	4	10	21	33	4397	1726	2673	471
474_c	NCBI	4	2015	Chicken	224	B1	5	15	17	48	4931	1726	3207	444
475_c	NCBI	4	2015	Chicken	361	A	6	20	19	40	4532	1724	2810	408
477_c	NCBI	4	2015	Chicken	361	A	6	21	20	41	4619	1725	2896	423
478_c	NCBI	4	2015	Chicken	224	B1	5	18	16	48	4943	1726	3219	358
479_c	NCBI	4	2015	Chicken	361	A	6	20	19	41	4568	1725	2845	382
480_c	NCBI	4	2015	Chicken	206	A	4	22	23	36	4356	1723	2635	413
481_c	NCBI	4	2015	Chicken	101	B1	5	32	21	44	4717	1726	2993	548
483_f	NCBI	4	2015	Fly	6390	A	4	19	25	35	4418	1721	2699	462
484_f	NCBI	4	2015	Fly	6390	A	4	20	25	35	4455	1723	2734	451
486_f	NCBI	4	2015	Fly	227	A	4	21	18	35	4498	1724	2776	584
487_f	lab	4	2015	Fly	1638	A	4	8	25	26	4398	1726	2674	382
489_f	lab	4	2015	Fly	156	B1	5	15	23	45	4569	1726	2845	324
490_f	lab	4	2015	Fly	167	A	4	18	18	45	4503	1726	2779	475
491_f	lab	4	2015	Fly	746	A	4	15	17	28	4401	1721	2682	249
492_f	lab	4	2015	Fly	48	A	4	19	24	37	4476	1723	2755	496
493_f	lab	4	2015	Fly	6395	A	4	13	27	35	4481	1726	2757	387
494_f	lab	4	2015	Fly	167	A	4	18	19	45	4495	1726	2771	475
495_f	lab	4	2015	Fly	6393	D	4	20	18	37	4338	1726	2614	292
496_f	lab	4	2015	Fly	6388	B1	5	10	26	43	4735	1726	3011	578
497_f	lab	4	2015	Fly	4408	A	4	7	11	31	4291	1723	2570	256
498_f	lab	4	2015	Fly	156	B1	5	9	19	45	4679	1725	2956	302
503_c	lab	4	2015	Chicken	162	B1	5	22	18	50	4650	1723	2929	502
504_c	lab	4	2015	Chicken	156	B1	5	13	17	49	4491	1726	2767	374
507_c	lab	4	2015	Chicken	617	A	4	12	23	40	4630	1726	2906	297
508_c	lab	4	2015	Chicken	48	A	4	22	24	41	4704	1725	2981	287
510_c	lab	4	2015	Chicken	10	A	4	23	19	44	4599	1726	2875	521
511_c	NCBI	4	2015	Chicken	156	B1	5	15	17	48	4560	1726	2836	313
544_c	NCBI	4	2015	Chicken	156	B1	5	12	31	47	4686	1726	2962	533
545_c	NCBI	4	2015	Chicken	224	B1	5	22	20	48	5067	1726	3343	371
549_f	NCBI	4	2015	Fly	6388	B1	5	19	22	46	4816	1725	3093	476
552_f	NCBI	4	2015	Fly	746	A	4	23	22	34	4471	1724	2749	564
554_c	NCBI	4	2015	Chicken	226	A	4	13	22	32	4477	1725	2754	430
555_f	NCBI	4	2015	Fly	6396	A	4	18	15	30	4403	1723	2682	284
557_c	NCBI	4	2015	Chicken	101	B1	5	21	22	40	4779	1726	3055	330
559_f	NCBI	4	2015	Fly	648	F	1	18	24	44	4971	1726	3247	363
578_c	NCBI	4	2015	Chicken	101	B1	5	18	21	42	4770	1726	3046	359
582_c	NCBI	4	2015	Chicken	162	B1	5	19	21	52	4618	1726	2894	402
583_c	NCBI	4	2015	Chicken	156	B1	5	19	22	48	4564	1726	2840	589
585_c	NCBI	4	2015	Chicken	6388	B1	5	9	19	44	4549	1725	2826	411
586_c	NCBI	4	2015	Chicken	224	B1	5	18	16	47	4922	1724	3200	374
590_f	NCBI	4	2015	Fly	156	B1	5	16	23	48	4686	1726	2962	523
591_c	NCBI	4	2015	Chicken	2732	D	3	25	25	50	4640	1722	2920	467
596_c	NCBI	4	2015	Chicken	602	B1	5	25	22	47	4531	1725	2808	516
598_f	NCBI	4	2015	Fly	167	A	4	19	18	45	4525	1726	2801	453
599_c	NCBI	4	2015	Chicken	156	B1	5	14	31	48	4678	1726	2954	581
600_c	NCBI	4	2015	Chicken	354	F	1	10	29	44	4661	1726	2937	499
604_c	NCBI	4	2015	Chicken	226	A	4	13	17	31	4521	1723	2800	468
606_c	NCBI	4	2015	Chicken	6388	B1	5	12	20	46	4876	1726	3152	573
621_c	NCBI	4	2015	Chicken	354	B2	1	10	29	46	4757	1726	3033	534
622_c	NCBI	4	2015	Chicken	156	B1	5	19	16	49	4612	1726	2888	359
623_c	NCBI	4	2015	Chicken	101	B1	5	18	29	45	4728	1724	3006	594
624_c	NCBI	4	2015	Chicken	6388	B1	5	10	19	43	4642	1726	2918	427
625_c	NCBI	4	2015	Chicken	354	F	1	14	28	45	4747	1726	3023	623
626_c	NCBI	4	2015	Chicken	156	B1	5	5	29	46	4714	1725	2991	378
627_c	NCBI	4	2015	Chicken	156	B1	5	11	29	49	5244	1725	3521	486
628_c	NCBI	4	2015	Chicken	156	B1	5	5	29	46	4697	1725	2974	404
634_c	NCBI	4	2015	Chicken	224	B1	5	20	21	48	4944	1726	3220	520
635_c	NCBI	4	2015	Chicken	156	B1	5	14	29	48	4762	1725	3039	455
636_c	NCBI	4	2015	Chicken	224	B1	5	18	16	48	4918	1726	3194	356
637_f	NCBI	4	2015	Fly	6390	A	4	15	23	35	4391	1716	2677	363
638_f	NCBI	4	2015	Fly	1518	A	4	17	20	28	4248	1721	2529	192
639_f	NCBI	4	2015	Fly	746	A	4	17	21	29	4395	1722	2675	470
640_f	NCBI	4	2015	Fly	226	A	4	10	21	33	4370	1720	2652	455
642_f	NCBI	4	2015	Fly	746	A	4	21	22	33	4348	1725	2625	560
643_f	NCBI	4	2015	Fly	746	A	4	17	21	33	4357	1725	2634	553
644_f	NCBI	4	2015	Fly	10	A	4	10	21	32	4330	1725	2607	344
645_f	NCBI	4	2015	Fly	6396	A	4	18	15	30	4403	1723	2682	284
650_c	NCBI	4	2015	Chicken	224	B1	5	19	17	48	4957	1726	3233	396
652_c	NCBI	4	2015	Chicken	48	A	4	20	25	42	4540	1724	2818	332
653_c	NCBI	4	2015	Chicken	1114	A	4	9	20	35	4389	1726	2665	347
654_c	NCBI	4	2015	Chicken	10	A	4	22	19	44	4629	1726	2905	486
655_c	NCBI	4	2015	Chicken	1114	A	4	10	20	35	4390	1726	2666	353
676_c	NCBI	4	2015	Chicken	361	A	6	19	19	41	4498	1724	2776	408
678_c	NCBI	4	2015	Chicken	156	B1	5	19	11	49	4541	1726	2817	349
681_f	NCBI	4	2015	Fly	746	A	4	13	13	33	4221	1721	2502	238
683_f	NCBI	4	2015	Fly	10	A	4	22	19	44	4464	1725	2741	651
686_f	NCBI	4	2015	Fly	48	A	4	21	24	38	4534	1721	2815	543
704_c	NCBI	4	2015	Chicken	167	A	4	24	23	45	4579	1721	2860	482
707_f	NCBI	4	2015	Fly	167	A	4	18	17	45	4487	1726	2763	479
710_c	NCBI	4	2015	Chicken	206	A	4	20	25	36	4350	1723	2629	494
A016f	NCBI	4	2015	Fly	48	A	4	15	30	45	5149	1678	3473	367
A025ch	NCBI	4	2015	Chicken	-	B1	5	12	12	40	4313	1726	2589	253
A043ch	NCBI	4	2015	Chicken	48	A	4	18	26	26	4332	1726	2608	292
A043p1	NCBI	4	2015	Pig	1178	A	4	4	9	33	4438	1726	2714	103
A043p2	NCBI	4	2015	Pig	1178	A	4	4	16	33	4443	1726	2719	104
A053p	NCBI	4	2015	Pig	1178	A	4	4	10	33	4452	1726	2728	94
A054ch	NCBI	4	2015	Chicken	1178	A	4	5	16	33	4425	1726	2701	125
A062p	NCBI	4	2015	Pig	1178	A	4	13	8	35	4624	1726	2900	130
B010p	NCBI	4	2015	Pig	542	A	4	19	14	29	4344	1726	2620	216
B011ch	lab	4	2015	Chicken	-	A	4	18	20	40	4556	1721	2837	227
B013p1	lab	4	2015	Pig	48	A	4	11	24	36	4425	1725	2702	389
B013p2	lab	4	2015	Pig	167	A	4	20	19	38	4603	1726	2879	452
B019ch	lab	4	2015	Chicken	226	A	4	18	18	34	4436	1724	2714	270
B024ch	lab	4	2015	Chicken	48	A	4	5	22	31	4319	1716	2605	179
B030f	lab	4	2015	Fly	7054	A	4	5	12	31	4330	1725	2607	141
B042f	lab	4	2015	Fly	-	A	4	16	30	24	4149	1726	2425	440
B062ch	lab	4	2015	Chicken	-	A	4	17	20	40	4749	1721	3030	264
C008f	lab	4	2015	Fly	206	A	4	4	8	31	4326	1725	2603	181
C013p	lab	4	2015	Pig	609	A	6	3	5	27	4198	1722	2478	93
C017p	lab	4	2015	Pig	1638	A	4	7	19	27	4399	1723	2678	217
C023p	lab	4	2015	Pig	34	A	4	12	16	31	4464	1716	2750	204
C035f	lab	4	2015	Fly	206	A	4	5	17	33	4298	1723	2577	109
D008p	lab	4	2015	Pig	1114	A	4	5	9	34	4575	1726	2851	69
D010p	lab	4	2015	Pig	1178	A	4	4	16	33	4566	1725	2843	94
D026p	lab	4	2015	Pig	48	A	4	10	22	35	4435	1726	2711	336
D038f	lab	4	2015	Fly	226	A	4	5	11	31	4165	1724	2443	210
D054ch	lab	4	2015	Chicken	744	A	4	7	24	32	4351	1725	2628	342
E009f	lab	4	2015	Fly	48	A	4	5	16	30	4217	1726	2493	158
E024p1	lab	4	2015	Pig	5728	B1	6	7	27	29	4438	1725	2715	106
E024p2	lab	4	2015	Pig	193	A	4	12	23	27	4338	1722	2618	121
E025f	lab	4	2015	Fly	6756	A	4	14	24	36	4383	1725	2660	326
E036p	lab	4	2015	Pig	515	B1	6	13	16	30	4226	1725	2503	229
E059f	lab	4	2015	Fly	48	A	4	6	21	30	4283	1725	2560	114
F004f	lab	4	2015	Fly	361	A	6	5	17	34	4241	1724	2519	252
F012ca	lab	4	2015	Cattle	-	A	4	6	19	25	4441	1724	2719	182
F037p1	lab	4	2015	Pig	6907	A	4	8	13	20	4368	1725	2645	128
F037p2	lab	4	2015	Pig	6907	A	4	8	13	23	4370	1725	2647	104
F054ch	lab	4	2015	Chicken	-	B1	5	12	11	34	4323	1726	2599	246
F056p	lab	4	2015	Pig	744	A	4	8	19	35	4769	1726	3045	177
F060p	lab	4	2015	Pig	744	A	4	8	16	32	4442	1726	2718	88
G003p	lab	4	2015	Pig	744	A	4	9	15	34	4304	1726	2580	100
G005p	lab	4	2015	Pig	206	A	4	11	21	33	4387	1726	2663	245
G006p1	lab	4	2015	Pig	206	A	4	6	7	34	4295	1726	2571	86
G006p2	NCBI	4	2015	Pig	10	A	4	6	10	36	4406	1726	2682	92
G007p	NCBI	4	2015	Pig	48	A	4	18	20	30	4364	1726	2640	177
G008p	NCBI	4	2015	Pig	34	A	4	12	16	32	4459	1724	2737	155
G009p1	NCBI	4	2015	Pig	6831	A	4	8	21	32	4535	1720	2817	301
G009p2	NCBI	4	2015	Pig	206	A	4	12	20	37	4490	1720	2772	280
G017p	NCBI	4	2015	Pig	1011	E	7	14	24	45	4536	1725	2813	293
G029f	NCBI	4	2015	Fly	206	A	4	4	11	36	4388	1724	2666	147
G029p	NCBI	4	2015	Pig	6831	A	4	7	23	32	4578	1721	2859	226
G041p	NCBI	4	2015	Pig	6395	A	4	12	18	35	4410	1726	2686	221
G047p	NCBI	4	2015	Pig	744	A	4	7	16	36	4271	1726	2547	93
G049p	NCBI	4	2015	Pig	5222	A	6	7	16	33	4210	1722	2490	186
GCA_002196825.1_ASM219682v1	NCBI	4	2015	Chicken	-	A	4	11	14	30	4388	1721	2669	176
H001p	NCBI	4	2015	Pig	730	A	6	5	12	29	4302	1722	2582	128
H022p	NCBI	4	2015	Pig	730	A	6	9	12	26	4353	1723	2632	133
H058p	lab	4	2015	Pig	1011	E	7	13	24	43	4584	1725	2861	290
I003p	lab	4	2015	Pig	744	A	4	18	21	31	4315	1726	2591	272
I025f	lab	4	2015	Fly	206	A	4	7	21	34	4282	1726	2558	274
I027ch	lab	4	2015	Chicken	48	A	4	6	20	32	4243	1723	2522	237
J034p	lab	4	2015	Pig	226	A	4	13	22	32	4385	1725	2662	398
J037ch	lab	4	2015	Chicken	167	A	4	19	19	39	4516	1726	2792	331
J041p	NCBI	4	2015	Pig	6908	A	4	6	17	36	4525	1726	2801	149
L001p	NCBI	4	2015	Pig	206	A	4	15	19	31	4494	1726	2770	103
L020p	NCBI	4	2015	Pig	6910	A	4	7	18	31	4462	1724	2740	285
L057p	NCBI	4	2015	Pig	206	A	4	7	19	32	4387	1726	2663	103
MOKV	NCBI	4	2015	Chicken	6387	A	6	18	15	41	4778	1725	3055	309
MOKW	NCBI	4	2015	Chicken	10	A	4	14	13	32	4493	1725	2770	195
MOLA	NCBI	4	2015	Chicken	410	C	2	15	15	50	4526	1726	2802	228
MOLB	NCBI	4	2015	Chicken	58	B1	5	16	7	47	4572	1726	2848	217
MOLC	NCBI	4	2015	Chicken	224	B1	5	23	25	40	4718	1726	2994	621
MOLD	NCBI	4	2015	Chicken	10	A	4	16	15	46	4878	1724	3156	451
MOLE	NCBI	4	2015	Chicken	156	B1	5	19	28	45	4646	1726	2922	506
MOLF	NCBI	4	2015	Chicken	10	A	4	17	17	42	4965	1725	3242	418
MOLG	NCBI	4	2015	Chicken	2847	E	7	14	21	48	4762	1724	3040	294
SC516	NCBI	4	2015	Chicken	48	A	4	0	4	35	4431	1725	2708	1
CCA14	NCBI	4	2016	Pig	10	A	4	14	24	35	4690	1726	2966	321
CCA22	lab	4	2016	Pig	48	A	4	14	20	29	4390	1726	2666	234
CCA47	lab	4	2016	Pig	10	A	4	14	24	35	4691	1726	2967	310
GDA49	lab	4	2016	Pig	6335	A	4	13	21	35	4397	1725	2674	281
GDA77	lab	4	2016	Pig	4014	B1	5	11	13	36	4445	1726	2721	126
GDA88	lab	4	2016	Pig	744	A	4	18	23	37	4317	1726	2593	203
MTPN	lab	4	2016	Pig	167	A	4	18	22	40	4381	1726	2657	224
PTMC	lab	4	2016	Chicken	10	A	4	0	19	37	4382	1722	2662	36
PTMD	lab	4	2016	Chicken	2705	A	6	17	15	36	4407	1725	2684	425
PTME	NCBI	4	2016	Chicken	7593	B1	5	14	26	40	4350	1726	2626	389
PTMF	NCBI	4	2016	Chicken	1196	B1	5	10	23	37	4427	1725	2704	473
PTMG	NCBI	4	2016	Chicken	7850	A	4	7	21	34	4384	1724	2662	310
PTMH	NCBI	4	2016	Chicken	10	A	4	5	21	31	4442	1724	2720	218
PTMI	NCBI	4	2016	Chicken	12	B2	9	11	15	34	4568	1722	2848	239
PTMJ	NCBI	4	2016	Chicken	10	A	4	13	25	41	4435	1724	2713	234
PTMK	NCBI	4	2016	Chicken	218	A	4	4	24	35	4524	1726	2800	315
PTML	NCBI	4	2016	Chicken	156	B1	5	18	21	36	4690	1726	2966	186
PTMM	NCBI	4	2016	Chicken	1011	D	7	13	23	50	4587	1722	2867	344
PTMN	NCBI	4	2016	Chicken	410	C	2	20	16	39	4499	1723	2778	345
PTMO	NCBI	4	2016	Chicken	1485	F	1	17	26	46	4552	1722	2832	374
PTMP	NCBI	4	2016	Chicken	48	A	4	7	20	42	4217	1725	2494	161
PTMQ	NCBI	4	2016	Chicken	162	B1	5	14	15	40	4443	1726	2719	191
PTMR	NCBI	4	2016	Chicken	48	A	4	5	21	34	4273	1723	2552	276
PTMS	NCBI	4	2016	Chicken	2913	A	4	14	17	37	4528	1726	2804	173
PTMT	NCBI	4	2016	Chicken	10	A	4	15	25	36	4440	1725	2717	379
PTMU	NCBI	4	2016	Chicken	165	A	4	4	19	39	4374	1724	2652	213
PTMV	NCBI	4	2016	Chicken	7854	A	4	2	17	34	4410	1725	2687	139
PTMW	NCBI	4	2016	Chicken	90	C	2	12	24	35	4488	1725	2765	198
PTMX	NCBI	4	2016	Chicken	7848	A	4	6	20	35	4285	1724	2563	355
PTMY	NCBI	4	2016	Chicken	1589	B1	5	10	15	38	4436	1726	2712	186
PTMZ	NCBI	4	2016	Chicken	101	B1	5	18	17	41	4825	1726	3101	279
PTNA	NCBI	4	2016	Chicken	359	B1	5	22	20	51	4563	1726	2839	429
PTNB	NCBI	4	2016	Chicken	1140	D	7	10	13	42	4576	1726	2852	243
PTNC	NCBI	4	2016	Chicken	2705	A	6	13	14	38	4581	1725	2858	270
PTND	NCBI	4	2016	Chicken	359	B1	5	21	20	45	4560	1726	2836	420
PTNE	NCBI	4	2016	Chicken	1196	B1	5	8	21	39	4450	1726	2726	329
PTNF	NCBI	4	2016	Chicken	6717	A	4	11	19	34	4518	1725	2795	372
PTNG	NCBI	4	2016	Chicken	7853	A	4	10	22	32	4214	1720	2496	153
PTNH	NCBI	4	2016	Chicken	155	B1	5	5	27	35	4424	1726	2700	354
PTNI	NCBI	4	2016	Chicken	1011	D	7	9	19	50	4586	1726	2862	231
PTNJ	NCBI	4	2016	Chicken	224	B1	5	17	30	37	4650	1726	2926	462
PTNK	NCBI	4	2016	Chicken	2690	A	4	15	16	40	4501	1726	2777	318
PTNL	NCBI	4	2016	Chicken	2705	A	6	16	15	38	4532	1725	2809	303
PTNM	NCBI	4	2016	Chicken	746	A	4	9	16	41	4338	1721	2619	227
PTNN	NCBI	4	2016	Chicken	156	B1	5	22	25	41	4498	1726	2774	513
PTNO	NCBI	4	2016	Chicken	1485	F	1	17	26	47	4571	1726	2847	406
PTNP	NCBI	4	2016	Chicken	6761	B1	5	2	7	43	4308	1726	2584	130
PTNQ	NCBI	4	2016	Chicken	12	B2	9	11	12	38	4645	1721	2926	206
PTNR	NCBI	4	2016	Chicken	218	A	4	4	23	41	4539	1726	2815	293
PTNS	NCBI	4	2016	Chicken	1518	A	4	5	12	26	4240	1718	2524	165
PTNT	NCBI	4	2016	Chicken	48	A	4	9	13	33	4251	1724	2529	214
PUDS	NCBI	4	2016	Chicken	206	A	4	16	17	36	4421	1721	2702	243
PUDT	NCBI	4	2016	Chicken	354	F	1	19	28	42	4574	1726	2850	449
PUDU	NCBI	4	2016	Chicken	1286	A	4	21	21	44	4686	1726	2962	433
PUDV	NCBI	4	2016	Chicken	746	A	4	5	11	38	4339	1721	2620	174
PUDW	lab	4	2016	Chicken	10	A	4	13	25	33	4442	1724	2720	260
PUDX	lab	4	2016	Chicken	1286	A	4	18	21	40	4661	1726	2937	395
PUDY	NCBI	4	2016	Chicken	155	B1	5	16	12	39	4436	1718	2720	220
PUDZ	NCBI	4	2016	Chicken	7122	A	4	7	16	37	4441	1722	2721	164
PUEA	NCBI	4	2016	Chicken	10	A	4	15	16	35	4514	1723	2793	255
PUEB	lab	4	2016	Chicken	6706	A	4	6	21	31	4387	1726	2663	294
QUOM	lab	4	2016	Chicken	457	F	1	8	20	45	4662	1725	2939	205
SRR6058995	NCBI	4	2016	Chicken	156	B1	5	13	27	40	4633	1725	2910	448
SRR6058997	NCBI	4	2016	Chicken	156	B1	5	13	28	46	4619	1724	2897	449
SRR6059054	NCBI	4	2016	Chicken	354	F	1	12	24	46	4649	1723	2928	453
SRR6059055	NCBI	4	2016	Chicken	354	F	1	12	24	44	4625	1725	2902	489
SRR6059059	NCBI	4	2016	Chicken	206	A	4	22	21	45	4558	1723	2837	496
SRR6059076	lab	4	2016	Chicken	6388	B1	5	9	23	39	4514	1726	2790	606
SRR6059077	lab	4	2016	Chicken	6388	B1	5	12	24	38	4632	1723	2911	209
SRR6059078	lab	4	2016	Chicken	155	B1	5	22	24	44	4437	1725	2714	386
SRR6059079	lab	4	2016	Chicken	2732	D	3	24	23	52	4753	1724	3031	417
SRR6060707	lab	4	2016	Chicken	162	B1	5	13	15	47	4413	1704	2711	443
SRR6060708	lab	4	2016	Chicken	7611	A	4	13	23	36	4435	1722	2715	417
SRR6060725	lab	4	2016	Chicken	5498	B1	5	10	15	40	4394	1724	2672	283
SRR6060741	lab	4	2016	Chicken	156	B1	5	20	23	43	4682	1725	2959	720
SRR6060746	lab	4	2016	Chicken	648	F	1	19	25	55	4968	1724	3246	597
SRR6062054	lab	4	2016	Chicken	2599	B1	5	18	32	47	4541	1725	2818	460
SRR6062055	lab	4	2016	Chicken	2599	B1	5	19	26	47	4609	1725	2886	390
SRR6062249	lab	4	2016	Chicken	206	A	4	24	24	42	4304	1721	2585	432
SRR6062251	lab	4	2016	Chicken	48	A	4	8	28	34	4298	1726	2574	321
SRR6062538	lab	4	2016	Chicken	224	B1	5	13	23	35	4596	1726	2872	281
SRR6062539	lab	4	2016	Chicken	-	A	4	13	15	36	4327	1722	2607	406
SRR6062540	lab	4	2016	Chicken	224	B1	5	14	23	36	4586	1726	2862	334
SRR6065852	lab	4	2016	Chicken	206	A	4	11	13	36	4415	1726	2691	199
SRR6066070	lab	4	2016	Chicken	93	A	6	20	22	41	4492	1725	2769	426
SRR6066178	NCBI	4	2016	Chicken	6844	A	4	9	18	41	4452	1725	2729	181
SRR6066443	NCBI	4	2016	Chicken	10	A	4	15	17	36	4545	1723	2824	171
SRR6066606	NCBI	4	2016	Chicken	2732	D	3	26	21	47	4685	1725	2962	499
SRR6066875	NCBI	4	2016	Chicken	224	B1	5	15	23	37	4625	1726	2901	456
SRR6066876	lab	4	2016	Chicken	6756	A	4	12	28	40	4598	1725	2875	473
SRR6066877	NCBI	4	2016	Chicken	354	F	1	11	21	43	4714	1725	2991	203
SRR6066878	NCBI	4	2016	Chicken	212	B1	5	11	21	43	4724	1722	3004	433
SRR6066879	NCBI	4	2016	Chicken	-	A	4	14	16	40	4389	1726	2665	291
SRR6066880	NCBI	4	2016	Chicken	361	A	6	19	16	34	4339	1725	2616	173
SRR6069470	NCBI	4	2016	Chicken	117	F	8	16	13	42	4546	1726	2822	356
WFA04	NCBI	4	2016	Pig	-	B1	5	5	30	38	4717	1726	2993	485
WFA05	NCBI	4	2016	Pig	10	A	4	6	21	38	4484	1726	2760	265
WFA160	NCBI	4	2016	Pig	1258	B1	5	8	12	37	4628	1726	2904	359
WFA174	NCBI	4	2016	Pig	10	A	4	18	17	35	4591	1725	2868	192
WFA64	NCBI	4	2016	Pig	69	D	3	10	19	43	4876	1726	3152	434
ZZA43	NCBI	4	2016	Pig	-	A	4	16	8	40	4535	1724	2813	538
ZZA45	NCBI	4	2016	Pig	-	A	4	16	8	39	4527	1724	2805	537
D72	lab	4	2017	Pig	1114	A	4	14	9	30	4332	1720	2614	207
ECCHD184	lab	4	2017	Chicken	7139	A	4	4	14	33	4559	1725	2836	120
ECCWS199	lab	4	2017	Chicken	48	A	4	4	19	33	4386	1725	2663	357
G3X16-2	lab	4	2017	Pig	1196	B1	5	8	28	36	4408	1726	2684	432
HB-Coli0	lab	4	2017	Chicken	602	B1	5	18	14	39	4519	1726	2795	233
LHM10-1	lab	4	2017	Pig	515	B1	6	14	24	36	4611	1723	2890	203
PTNU	lab	4	2017	Cattle	226	A	4	12	16	29	4270	1726	2546	221
PTNV	lab	4	2017	Cattle	1771	A	5	6	11	31	4424	1726	2700	136
PTNW	NCBI	4	2017	Cattle	361	A	6	13	16	43	4499	1725	2776	135
PTNX	NCBI	4	2017	Cattle	1704	B1	5	14	14	36	4532	1726	2808	277
PTNZ	NCBI	4	2017	Cattle	226	A	4	12	16	29	4290	1726	2566	198
PTOA	NCBI	4	2017	Cattle	-	B1	5	8	17	42	4511	1726	2787	130
PTOB	lab	4	2017	Cattle	189	A	4	2	13	36	4410	1726	2686	224
PTOC	lab	4	2017	Cattle	224	B1	5	2	18	37	4707	1726	2983	132
PTOD	NCBI	4	2017	Cattle	154	B1	5	13	19	37	4462	1726	2738	308
PTOE	lab	4	2017	Cattle	1141	A	4	2	7	34	4406	1726	2682	107
PTOF	lab	4	2017	Cattle	744	A	4	18	18	38	4346	1726	2622	312
PTOG	lab	4	2017	Cattle	10	A	4	11	11	40	4645	1726	2921	193
PTOH	lab	4	2017	Cattle	162	B1	5	13	14	49	4587	1726	2863	179
PTOI	lab	4	2017	Cattle	48	A	4	3	16	35	4606	1724	2884	142
PTOJ	lab	4	2017	Cattle	4753	E	7	20	20	52	4889	1726	3165	259
PTOK	lab	4	2017	Cattle	1248	B1	5	12	4	43	4703	1726	2979	93
PTOL	lab	4	2017	Cattle	1079	B1	5	8	9	45	4527	1726	2803	198
RRZS	NCBI	4	2017	Chicken	-	B1	5	15	26	49	5419	1690	3731	379
ST95-32	NCBI	4	2017	Chicken	95	B2	9	15	13	41	4806	1725	3083	461
YSP8-1	NCBI	4	2017	Pig	542	A	4	19	29	33	4643	1725	2920	169
BCE049	NCBI	4	2018	Cattle	95	B2	9	12	3	38	4812	1723	3091	329
SSWI	NCBI	4	2018	Pig	641	B1	5	18	17	32	4609	1726	2885	154
SSWJ	NCBI	4	2018	Pig	6833	A	6	9	16	35	4774	1725	3051	11
SSWK	NCBI	4	2018	Pig	1196	B1	5	8	18	37	4412	1726	2688	340
SVID	NCBI	4	2018	Pig	-	A	4	21	20	46	4860	1723	3139	384
SXGP	NCBI	4	2018	Pig	1684	A	6	11	18	39	4509	1724	2787	115
VXKX	lab	4	2018	Chicken	10	A	4	12	18	37	4544	1721	2825	348
VXKY	NCBI	4	2018	Duck	354	F	1	20	14	46	4689	1726	2965	150
YY76-1	NCBI	4	2018	Cattle	48	A	4	10	20	30	4261	1725	2538	232
1916D18	NCBI	4	2019	Pig	641	B1	5	17	11	35	4530	1725	2807	83
1916D6	NCBI	4	2019	Pig	761	A	4	6	14	29	4386	1719	2669	156
1919D3	NCBI	4	2019	Pig	8165	A	5	6	13	38	4564	1726	2840	95
1919D62	NCBI	4	2019	Pig	7131	A	6	6	10	38	4296	1724	2574	328

## Sheet: gene screen
Sample	plasmid replicons-count	AC	AC2	BOKZ	Col	Col156	Col8282	ColBS512	ColE10	ColFST258_1	ColKPHS6	ColIRGK	ColMG828	ColMP18	ColRNAI_1	ColVCM04_1	ColpVC	FIA	FIAHI1_HI1	FIBAP001918_1	FIBK_Kpn3	FIBS_1	FIB_CU638872	FIB_DQ388534	FIBpB171_pB171	FIBpHCM2_pHCM2	FIBpLF82_pLF82	FIC	FII29_pUTI89	FII_1	FII_AF401292	FII_AM886293	FII_AY091607	FII_M26937	FII_pSFO	FIIpCTU2_pCTU2	FIIpCoo_pCoo	FIIpHN7A8_pHN7A8	FIIpRSB107_pRSB107	FIIpSE11_pSE11	HI1A	HI1BCIT	HI1BR27_R27	HI2	HI2A_1	I1_AP011954	I1_Alpha	I2_Delta	K
count		64	64	110	239	144	14	21	19	4	5	2	261	1	52	3	20	110	84	595	112	11	51	11	11	26	52	258	609	596	478	605	685	379	478	1	679	445	331	593	13	91	12	180	177	220	219	244	110
prevalence		0.0651731	0.0651731	0.112016	0.242363	0.14664	0.0142566	0.0213849	0.0193483	0.00407332	0.00509165	0.00203666	0.264766	0.00101833	0.0519348	0.00305499	0.0203666	0.112016	0.0855397	0.604888	0.114053	0.0112016	0.0519348	0.0112016	0.0112016	0.0264766	0.0529532	0.262729	0.619145	0.605906	0.485743	0.615071	0.696538	0.385947	0.485743	0.00101833	0.690428	0.453157	0.337067	0.602851	0.0132383	0.092668	0.01222	0.182281	0.179226	0.224033	0.223014	0.247454	0.112016
101	15	0	0	0	1	0	0	0	0	0	0	0	0	0	0	0	0	1	0	1	0	0	0	0	0	0	0	1	1	1	1	1	1	1	1	0	1	1	1	1	0	0	0	0	0	0	0	0	0
103	9	0	0	0	0	0	0	0	0	0	0	0	0	0	0	0	0	0	0	0	0	0	0	0	0	0	0	0	1	1	0	1	1	0	0	0	1	0	0	1	0	0	0	0	0	0	0	1	0
104	19	0	0	0	1	0	0	0	0	0	0	0	0	0	1	0	0	0	0	0	0	0	0	0	0	0	0	1	1	1	1	1	1	1	1	0	1	1	1	1	0	0	0	0	0	0	0	0	0
105	0	0	0	0	0	0	0	0	0	0	0	0	0	0	0	0	0	0	0	0	0	0	0	0	0	0	0	0	0	0	0	0	0	0	0	0	0	0	0	0	0	0	0	0	0	0	0	0	0
106	9	0	0	0	0	0	0	0	0	0	0	0	0	0	0	0	0	0	0	0	0	0	0	0	0	0	0	0	1	1	1	1	1	0	1	0	1	1	0	1	0	0	0	0	0	0	0	0	0
108	7	0	0	0	0	0	0	0	0	0	0	0	0	0	0	0	0	0	0	0	0	0	0	0	0	0	0	0	1	1	0	1	1	0	0	0	1	0	0	1	0	0	0	0	0	0	0	0	0
112	7	0	0	0	0	0	0	0	0	0	0	0	0	0	0	0	0	0	0	1	0	0	0	0	0	0	0	0	1	1	0	1	1	0	0	0	1	0	0	1	0	0	0	0	0	0	0	0	0
117	6	0	0	0	0	0	0	0	0	0	0	0	0	0	0	0	0	0	0	0	0	0	0	0	0	0	0	0	1	1	0	1	1	0	0	0	1	0	0	1	0	0	0	0	0	0	0	0	0
120	2	0	0	0	0	0	0	0	0	0	0	0	0	0	0	0	0	0	0	0	0	0	0	0	0	0	0	0	0	0	0	0	0	0	0	0	0	0	0	0	0	0	0	0	0	1	1	0	0
122	7	0	0	0	0	0	0	0	0	0	0	0	0	0	0	0	0	0	0	1	0	0	0	0	0	0	0	0	1	1	0	1	1	0	0	0	1	0	0	1	0	0	0	0	0	0	0	0	0
123	8	0	0	0	0	0	0	0	0	0	0	0	0	0	0	0	0	0	0	1	0	0	0	0	0	0	0	0	1	1	0	1	1	0	0	0	1	0	0	1	0	0	0	0	0	0	0	0	0
124	8	0	0	0	0	0	0	0	0	0	0	0	0	0	0	0	0	0	0	1	0	0	0	0	0	0	0	0	1	1	0	1	1	0	0	0	1	0	0	1	0	0	0	0	0	0	0	0	0
126	8	0	0	0	0	1	0	0	0	0	0	0	0	0	0	0	0	0	0	1	0	0	0	0	0	0	0	0	1	1	0	1	1	0	0	0	1	0	0	1	0	0	0	0	0	0	0	0	0
127	7	0	0	0	0	0	0	0	0	0	0	0	0	0	0	0	0	0	0	1	0	0	0	0	0	0	0	0	1	1	0	1	1	0	0	0	1	0	0	1	0	0	0	0	0	0	0	0	0
128	9	0	0	0	0	0	0	0	0	0	0	0	0	0	0	0	0	0	0	1	0	0	0	0	0	0	0	0	1	1	1	1	1	0	1	0	1	0	0	1	0	0	0	0	0	0	0	0	0
129	4	0	0	0	0	0	0	0	0	0	0	0	0	0	0	0	0	0	0	0	0	0	0	0	0	0	0	0	0	0	0	0	0	0	0	0	0	0	0	0	0	0	0	0	0	0	0	0	0
130	6	0	0	0	0	0	0	0	0	0	0	0	0	0	0	0	0	0	0	0	0	0	0	0	0	0	0	0	0	0	0	0	0	0	0	0	0	0	0	0	0	0	0	0	0	1	1	0	0
131	0	0	0	0	0	0	0	0	0	0	0	0	0	0	0	0	0	0	0	0	0	0	0	0	0	0	0	0	0	0	0	0	0	0	0	0	0	0	0	0	0	0	0	0	0	0	0	0	0
132	10	0	0	0	0	0	0	0	0	0	0	0	0	0	0	0	0	0	0	0	0	0	0	0	0	0	0	0	1	1	1	1	1	1	1	0	1	1	0	1	0	0	0	0	0	0	0	0	0
133	9	0	0	0	0	0	0	0	0	0	0	0	0	0	0	0	0	0	0	1	0	0	0	0	0	0	0	0	1	1	0	1	1	0	0	0	1	0	0	1	0	0	0	0	0	1	1	0	0
134	1	0	0	0	0	0	0	0	0	0	0	0	0	0	0	0	0	0	0	1	0	0	0	0	0	0	0	0	0	0	0	0	0	0	0	0	0	0	0	0	0	0	0	0	0	0	0	0	0
135	8	0	0	0	0	0	0	0	0	0	0	0	0	0	0	0	0	0	0	0	0	0	0	0	0	0	0	0	1	1	0	1	1	0	0	0	1	1	0	1	0	0	0	0	0	0	0	0	0
137	11	0	0	1	0	0	0	0	0	0	0	0	0	0	0	0	0	1	0	1	0	0	0	0	0	0	0	1	1	1	0	1	1	0	0	0	1	0	0	1	0	0	0	0	0	0	0	0	1
139	11	0	0	0	0	0	0	0	0	0	0	0	0	0	0	0	0	0	0	1	0	0	0	0	0	0	0	1	1	1	1	1	1	0	1	0	1	1	0	1	0	0	0	0	0	0	0	0	0
140	11	0	0	0	0	0	0	0	0	0	0	0	0	0	0	0	0	1	0	1	0	0	0	0	0	0	0	0	1	0	1	1	0	1	1	0	0	1	1	0	0	1	0	0	0	0	0	0	0
183	20	1	1	1	1	0	0	0	1	0	0	0	0	0	0	0	0	1	0	1	0	0	0	0	0	0	0	0	1	1	1	1	1	1	1	0	1	1	1	1	0	0	0	0	0	0	0	0	1
190	0	0	0	0	0	0	0	0	0	0	0	0	0	0	0	0	0	0	0	0	0	0	0	0	0	0	0	0	0	0	0	0	0	0	0	0	0	0	0	0	0	0	0	0	0	0	0	0	0
260	24	0	0	1	0	0	0	0	0	0	0	0	0	0	0	0	0	1	0	1	0	0	0	0	0	0	0	0	1	1	1	1	1	1	1	0	1	1	1	1	0	0	0	0	0	1	1	0	1
262	11	0	0	1	0	0	0	0	0	0	0	0	0	0	0	0	0	0	0	0	0	0	0	0	0	0	0	0	1	1	0	1	1	0	0	0	1	0	0	1	0	0	0	0	0	0	0	0	1
277	19	1	1	0	1	0	0	0	1	0	0	0	0	0	0	0	0	1	0	1	0	0	0	0	0	0	0	0	1	1	1	1	1	1	1	0	1	1	1	1	0	0	0	0	0	1	1	0	0
288	16	0	0	0	0	0	0	0	0	0	0	0	0	0	0	0	0	1	0	1	0	0	0	0	0	0	0	0	1	1	1	1	1	1	1	0	1	1	1	1	0	0	0	0	0	0	0	0	0
312	12	0	0	0	0	0	0	0	0	0	0	0	0	0	0	0	0	0	0	0	0	0	0	0	0	0	0	0	1	1	1	1	1	1	1	0	1	1	0	1	0	0	0	0	0	0	0	0	0
313	12	0	0	0	1	0	0	0	0	0	0	0	0	0	0	0	0	0	0	1	0	0	0	0	0	0	0	0	1	1	1	1	1	1	1	0	1	1	0	1	0	0	0	0	0	0	0	0	0
314	2	0	0	0	0	0	0	0	0	0	0	0	0	0	0	0	0	0	0	0	0	0	0	0	0	0	0	0	0	0	0	0	0	0	0	0	0	0	0	0	0	0	0	0	0	1	1	0	0
315	4	0	0	0	0	0	0	0	0	0	0	0	0	0	0	0	0	0	0	0	0	0	0	0	0	0	0	0	0	0	0	0	0	0	0	0	0	0	0	0	0	0	0	0	0	1	1	0	0
317	1	0	0	0	0	0	0	0	0	0	0	0	1	0	0	0	0	0	0	0	0	0	0	0	0	0	0	0	0	0	0	0	0	0	0	0	0	0	0	0	0	0	0	0	0	0	0	0	0
395	0	0	0	0	0	0	0	0	0	0	0	0	0	0	0	0	0	0	0	0	0	0	0	0	0	0	0	0	0	0	0	0	0	0	0	0	0	0	0	0	0	0	0	0	0	0	0	0	0
444	23	1	1	0	1	0	0	0	0	0	0	0	1	0	0	0	0	0	0	1	0	0	0	0	0	0	0	1	1	1	1	1	1	1	1	0	1	1	1	1	0	0	0	1	1	0	0	1	0
502	0	0	0	0	0	0	0	0	0	0	0	0	0	0	0	0	0	0	0	0	0	0	0	0	0	0	0	0	0	0	0	0	0	0	0	0	0	0	0	0	0	0	0	0	0	0	0	0	0
503	15	0	0	0	0	0	0	0	0	0	0	0	0	0	0	0	0	0	0	1	0	0	0	0	0	0	0	1	1	1	1	1	1	1	1	0	1	1	1	1	0	0	0	0	0	1	1	0	0
504	1	0	0	0	0	0	0	0	0	0	0	0	0	0	0	0	0	0	0	1	0	0	0	0	0	0	0	0	0	0	0	0	0	0	0	0	0	0	0	0	0	0	0	0	0	0	0	0	0
505	1	0	0	0	0	0	0	0	0	0	0	0	0	0	0	0	0	0	0	1	0	0	0	0	0	0	0	0	0	0	0	0	0	0	0	0	0	0	0	0	0	0	0	0	0	0	0	0	0
507	0	0	0	0	0	0	0	0	0	0	0	0	0	0	0	0	0	0	0	0	0	0	0	0	0	0	0	0	0	0	0	0	0	0	0	0	0	0	0	0	0	0	0	0	0	0	0	0	0
508	13	0	0	0	0	0	0	0	0	0	0	0	0	0	0	0	0	0	0	1	0	0	0	0	0	0	0	1	1	1	1	1	1	1	1	0	1	1	1	1	0	0	0	0	0	0	0	0	0
515	3	0	0	0	0	0	0	0	0	0	0	0	0	0	0	0	0	0	1	0	0	0	0	0	0	0	0	0	0	0	0	0	0	0	0	0	0	0	0	0	0	0	0	0	0	0	0	0	0
516	7	0	0	0	0	0	0	0	0	0	0	0	0	0	0	0	0	0	0	1	0	0	0	0	0	0	0	0	1	1	0	1	1	0	0	0	1	0	0	1	0	0	0	0	0	0	0	0	0
520	7	0	0	0	0	0	0	0	0	0	0	0	0	0	0	0	0	0	0	1	0	0	0	0	0	0	0	0	1	1	0	1	1	0	0	0	1	0	0	1	0	0	0	0	0	0	0	0	0
521	7	0	0	0	0	0	0	0	0	0	0	0	0	0	0	0	0	0	0	1	0	0	0	0	0	0	0	0	1	1	0	1	1	0	0	0	1	0	0	1	0	0	0	0	0	0	0	0	0
522	7	0	0	0	0	0	0	0	0	0	0	0	0	0	0	0	0	0	0	1	0	0	0	0	0	0	0	0	1	1	0	1	1	0	0	0	1	0	0	1	0	0	0	0	0	0	0	0	0
523	7	0	0	0	0	0	0	0	0	0	0	0	0	0	0	0	0	0	0	1	0	0	0	0	0	0	0	0	1	1	0	1	1	0	0	0	1	0	0	1	0	0	0	0	0	0	0	0	0
525	10	0	0	0	0	0	0	0	0	0	0	0	0	0	0	0	0	0	0	0	0	0	0	0	0	0	0	0	1	1	1	1	1	0	1	0	1	1	0	1	0	0	0	0	0	0	0	0	0
532	6	0	0	0	0	0	0	0	0	0	0	0	0	0	0	0	0	0	1	0	1	0	0	0	0	0	0	0	0	0	0	0	0	0	0	0	0	0	0	0	0	0	0	0	0	0	0	0	0
533	17	0	0	0	1	0	0	0	1	0	0	0	0	0	0	0	0	1	0	1	0	0	0	0	0	0	0	0	1	1	1	1	1	1	1	0	1	1	1	1	0	0	0	0	0	1	1	0	0
535	19	0	0	0	1	0	0	0	1	0	0	0	0	0	0	0	0	1	0	1	0	0	0	0	0	0	0	0	1	1	1	1	1	1	1	0	1	1	1	1	0	0	0	0	0	0	0	0	0
537	11	0	0	0	1	0	0	0	0	0	0	0	0	0	0	0	0	0	0	1	0	0	0	0	0	0	0	0	1	1	1	1	1	0	1	0	1	1	0	1	0	0	0	0	0	0	0	0	0
538	11	0	0	0	1	0	0	0	0	0	0	0	0	0	0	0	0	0	0	1	0	0	0	0	0	0	0	0	1	1	1	1	1	0	1	0	1	1	0	1	0	0	0	0	0	0	0	0	0
541	17	0	0	0	1	0	0	0	1	0	0	0	0	0	0	0	0	1	0	1	0	0	0	0	0	0	0	0	1	1	1	1	1	1	1	0	1	1	1	1	0	0	0	0	0	1	1	0	0
542	16	0	0	0	1	0	0	0	1	0	0	0	0	0	0	0	1	0	0	0	0	1	0	1	1	0	0	0	1	1	1	1	1	1	1	0	1	1	0	1	0	0	0	0	0	0	0	0	0
543	19	0	0	0	1	0	0	0	1	0	0	0	0	0	0	0	0	1	0	1	0	0	0	0	0	0	0	0	1	1	1	1	1	1	1	0	1	1	1	1	0	0	0	0	0	0	0	0	0
544	13	0	0	0	0	0	0	0	0	0	0	0	0	0	0	0	0	0	0	1	0	0	0	0	0	0	0	1	1	1	1	1	1	1	1	0	1	1	1	1	0	0	0	0	0	0	0	0	0
547	8	0	0	0	0	0	0	0	0	0	0	0	0	0	0	0	0	0	0	1	0	0	0	0	0	0	0	0	1	1	0	1	1	0	0	0	1	0	0	1	0	0	0	0	0	0	0	0	0
555	12	0	0	0	0	0	0	0	0	0	0	0	0	0	0	0	0	0	0	0	0	0	0	0	0	0	0	1	1	1	1	1	1	1	1	0	1	1	1	1	0	0	0	0	0	0	0	0	0
556	13	0	0	0	0	0	0	0	0	0	0	0	0	0	0	0	0	0	0	0	0	0	0	0	0	0	0	1	1	1	1	1	1	1	1	0	1	1	1	1	0	0	0	0	0	0	0	0	0
557	14	0	0	0	0	0	0	0	0	0	0	0	0	0	0	0	0	0	0	1	0	0	0	0	0	0	0	1	1	1	1	1	1	1	1	0	1	1	1	1	0	0	0	0	0	0	0	0	0
560	15	0	0	0	1	0	0	0	0	0	0	0	0	0	1	0	0	0	0	1	0	0	0	0	0	0	0	1	1	1	1	1	1	1	1	0	1	1	1	1	0	0	0	0	0	0	0	0	0
570	24	0	0	1	1	1	0	0	0	0	0	0	1	0	0	0	0	0	0	0	0	0	1	0	0	0	1	0	0	0	1	0	1	1	1	0	1	1	1	0	0	0	0	0	0	1	1	1	1
579	7	0	0	0	0	0	0	0	0	0	0	0	0	0	0	0	0	0	0	1	0	0	0	0	0	0	0	0	1	1	0	1	1	0	0	0	1	0	0	1	0	0	0	0	0	0	0	0	0
609	2	0	0	0	0	0	0	0	0	0	0	0	0	0	0	0	0	0	0	0	0	0	0	0	0	1	0	0	0	0	0	0	0	0	0	0	0	0	0	0	0	0	0	0	0	0	0	0	0
611	12	0	0	0	0	0	0	0	0	0	0	0	0	0	0	0	0	0	0	0	0	0	0	0	0	0	0	0	1	1	1	1	1	0	1	0	1	1	0	1	0	0	0	0	0	0	0	0	0
612	12	0	0	0	0	0	0	0	0	0	0	0	0	0	0	0	0	0	0	0	0	0	0	0	0	0	0	0	1	1	1	1	1	0	1	0	1	1	0	1	0	0	0	0	0	0	0	0	0
613	7	0	0	0	0	0	0	0	0	0	0	0	1	0	0	0	0	0	0	0	0	0	0	0	0	0	0	0	0	0	0	0	0	0	0	0	0	0	0	0	0	0	0	1	1	1	1	1	0
614	16	1	1	0	1	0	0	0	0	0	0	0	0	0	1	0	0	0	0	1	0	0	0	0	0	0	0	0	1	1	0	1	1	0	0	0	1	0	0	1	0	0	0	0	0	1	1	1	0
618	7	0	0	0	0	0	0	0	0	0	0	0	0	0	0	0	0	0	0	1	0	0	0	0	0	0	0	0	1	1	0	1	1	0	0	0	1	0	0	1	0	0	0	0	0	0	0	0	0
622	8	0	0	0	1	0	0	0	0	0	0	0	0	0	0	0	0	0	0	0	0	0	0	0	0	0	0	0	1	1	0	1	1	0	0	0	1	0	0	1	0	0	0	0	0	0	0	0	0
646	7	0	0	0	1	0	0	0	0	0	0	0	0	0	0	0	0	0	0	0	0	0	0	0	0	0	0	0	1	1	0	1	1	0	0	0	1	0	0	1	0	0	0	0	0	0	0	0	0
660	10	0	0	0	0	0	0	0	0	0	0	0	0	0	0	0	0	0	0	0	0	0	0	0	0	0	0	0	1	1	1	1	1	0	1	0	1	1	0	1	0	0	0	0	0	0	0	0	0
674	10	0	0	0	0	0	0	0	0	0	0	0	0	0	0	0	0	0	0	0	0	0	0	0	0	0	0	0	1	1	1	1	1	0	1	0	1	1	0	1	0	0	0	0	0	0	0	0	0
690	13	0	0	0	1	0	0	0	0	0	0	0	0	0	0	0	0	0	0	1	0	0	0	0	0	0	0	1	1	1	1	1	1	1	1	0	1	1	0	1	0	0	0	0	0	0	0	0	0
698	14	0	0	0	0	0	0	0	0	0	0	0	0	0	0	0	0	0	0	1	0	0	0	0	0	0	0	1	1	1	1	1	1	1	1	0	1	1	1	1	0	0	0	0	0	0	0	0	0
807	7	0	0	0	0	0	0	0	0	0	0	0	0	0	0	0	0	0	0	1	0	0	0	0	0	0	0	0	1	1	0	1	1	0	0	0	1	0	0	1	0	0	0	0	0	0	0	0	0
831	9	0	0	0	0	0	0	0	0	0	0	0	0	0	0	0	0	0	0	1	0	0	0	0	0	0	0	0	1	1	0	1	1	0	0	0	1	0	0	1	0	0	0	0	0	0	0	0	0
845	15	0	0	0	0	0	0	0	0	0	0	0	0	0	0	0	0	0	0	1	0	0	0	0	0	0	0	1	1	1	1	1	1	1	1	0	1	1	1	1	0	0	0	1	1	0	0	0	0
917	15	0	0	0	1	0	0	0	0	0	0	0	1	0	0	0	0	0	0	1	0	0	0	0	0	0	0	1	1	0	1	0	1	1	1	0	1	1	1	1	0	0	0	0	0	1	1	0	0
5118	7	0	0	0	0	0	0	0	0	0	0	0	0	0	0	0	0	0	0	1	0	0	0	0	0	0	0	0	1	1	0	1	1	0	0	0	1	0	0	1	0	0	0	0	0	0	0	0	0
09b17	11	0	0	0	1	1	0	0	0	0	0	0	0	0	1	0	0	0	0	1	0	0	0	0	0	0	0	0	1	1	0	1	1	0	0	0	1	0	0	1	0	0	0	0	0	0	0	1	0
09b19	12	0	0	0	0	0	0	0	0	0	0	0	0	0	0	0	0	0	0	1	0	0	0	0	0	0	0	0	1	1	0	1	1	0	0	0	1	0	0	1	0	0	0	1	1	0	0	1	0
09b21	21	0	0	0	0	0	0	0	0	0	0	0	1	0	0	0	0	0	0	1	0	0	0	0	0	0	0	1	1	1	1	1	1	1	1	0	1	1	1	1	0	0	0	0	0	1	1	1	0
09b23	18	0	0	0	1	0	0	0	0	0	0	0	0	0	0	0	0	0	0	1	0	0	0	0	0	0	0	0	1	1	1	1	1	0	1	0	1	0	0	1	0	0	0	1	1	0	0	1	0
09b25-2	5	0	0	0	0	0	0	0	0	0	0	0	0	0	0	0	0	0	0	0	0	0	0	0	0	0	0	0	0	0	0	0	0	0	0	0	0	0	0	0	0	0	0	0	0	0	0	1	0
09b28	21	0	0	0	0	0	0	0	0	0	0	0	1	0	0	0	0	0	0	1	0	0	0	0	0	0	0	1	1	1	1	1	1	1	1	0	1	1	1	1	0	0	0	0	0	1	1	1	0
09b31	15	0	0	0	1	0	0	0	0	0	0	0	0	0	1	0	0	0	0	1	0	0	0	0	0	0	0	1	1	1	0	1	1	0	0	0	1	0	0	1	0	0	0	0	0	0	0	1	0
105-2	12	0	0	0	0	0	0	0	0	0	0	0	0	0	0	0	0	0	0	0	0	0	0	0	0	0	0	1	1	1	1	1	1	1	1	0	1	1	1	1	0	0	0	0	0	0	0	0	0
10c21	13	1	1	1	0	0	0	0	0	0	0	0	0	0	0	0	0	0	0	1	0	0	0	0	0	0	0	0	1	1	0	1	1	0	0	0	1	0	0	1	0	0	0	0	0	1	1	0	1
10c23	6	0	0	0	0	0	0	0	0	0	0	0	0	0	0	0	0	0	0	1	0	0	0	0	0	0	0	0	0	1	0	1	1	0	0	0	1	0	0	1	0	0	0	0	0	0	0	0	0
10c25	15	0	0	0	0	0	0	0	0	0	0	0	0	0	0	0	0	0	0	1	0	0	0	0	0	0	0	1	1	1	1	1	1	1	1	0	1	1	1	1	0	0	0	1	1	0	0	0	0
10c28	12	0	0	0	1	0	0	0	0	0	0	0	0	0	0	0	0	0	0	0	0	0	0	0	0	0	0	0	0	0	1	0	1	1	1	0	1	1	1	0	0	0	0	1	1	0	0	0	0
10c30	21	0	0	0	0	0	0	0	0	0	0	0	1	0	0	0	0	0	0	1	0	0	0	0	0	0	0	0	1	1	1	1	1	0	1	0	1	1	0	1	0	0	0	1	1	0	0	0	0
10f39	2	0	0	0	0	0	0	0	0	0	0	0	0	0	0	0	0	0	0	0	1	0	0	0	0	0	0	0	0	0	0	0	0	0	0	0	0	0	0	0	0	0	0	0	0	0	0	0	0
10f52	2	0	0	0	0	0	0	0	0	0	0	0	0	0	0	0	0	0	0	0	0	0	0	0	0	0	0	0	0	0	0	0	0	0	0	0	0	0	0	0	0	1	0	0	0	0	0	0	0
10f54	5	0	0	0	1	0	0	0	0	0	0	0	0	0	0	0	0	0	0	0	0	0	0	0	0	0	0	0	0	0	0	0	0	0	0	0	0	0	0	0	0	0	0	0	0	0	0	0	0
10f56	13	0	0	0	0	0	0	0	0	0	0	0	0	0	0	0	0	0	0	0	0	0	0	0	0	0	0	0	1	1	1	1	1	0	1	0	1	0	1	1	0	0	0	0	0	0	0	0	0
10f58	2	0	0	0	0	0	0	0	0	0	0	0	0	0	0	0	0	0	0	0	0	0	0	0	0	0	0	0	0	0	0	0	0	0	0	0	0	0	0	0	0	0	0	0	0	0	0	0	0
10f60	11	0	0	0	0	0	0	0	0	0	0	0	0	0	0	0	0	0	1	1	0	0	0	0	0	0	0	1	1	1	0	1	1	0	0	0	1	0	0	1	0	0	0	0	0	0	0	1	0
11a2	21	1	1	1	1	1	0	0	0	0	0	0	1	0	0	0	0	1	0	1	0	0	0	0	0	0	0	0	0	0	1	0	1	1	1	0	1	1	1	0	0	0	0	0	0	0	0	1	1
11a3	15	1	1	1	1	1	0	0	0	0	0	0	1	0	0	0	0	0	0	0	0	0	0	0	0	0	0	0	0	0	1	0	1	1	1	0	1	1	1	0	0	0	0	0	0	0	0	0	1
11a5	21	1	1	1	1	1	0	0	0	0	0	0	1	0	0	0	0	1	0	1	0	0	0	0	0	0	0	0	0	0	1	0	1	1	1	0	1	1	1	0	0	0	0	0	0	0	0	1	1
11a6	14	1	1	1	1	1	0	0	0	0	0	0	1	0	0	0	0	1	0	1	0	0	0	0	0	0	0	0	0	0	0	0	0	0	0	0	0	0	0	0	0	0	0	0	0	0	0	1	1
11a9	20	1	1	1	1	0	0	0	0	0	0	0	1	0	0	0	0	1	0	1	0	0	0	0	0	0	0	0	0	0	1	0	1	1	1	0	1	1	1	0	0	0	0	0	0	0	0	1	1
11b11	16	0	0	1	1	0	0	1	0	1	1	0	1	0	0	0	0	0	1	0	1	0	0	0	0	0	0	0	1	1	0	1	1	0	0	0	1	0	0	1	0	0	0	0	0	0	0	1	1
11b12	24	0	0	1	0	0	0	0	0	0	0	0	1	0	0	0	0	0	1	0	0	0	0	0	0	0	0	0	1	1	1	1	1	1	1	0	1	1	1	1	1	1	1	0	0	0	0	1	1
11b4	12	0	0	0	0	0	0	0	0	0	0	0	0	0	1	0	0	0	0	1	0	0	0	0	0	0	0	1	1	1	1	1	1	0	1	0	1	0	0	1	0	0	0	0	0	0	0	1	0
11b7	14	0	0	0	1	0	0	0	0	0	0	0	0	0	0	0	0	0	0	0	0	0	0	0	0	0	0	0	1	1	1	1	1	0	1	0	1	0	1	1	0	0	0	1	1	0	0	1	0
11c13	14	0	0	0	0	0	0	0	0	0	0	0	1	0	0	0	0	0	0	0	0	0	0	0	0	0	0	0	0	0	0	0	0	0	0	0	0	0	0	0	0	0	0	0	0	1	1	1	0
11c22	13	0	0	0	0	0	0	0	0	0	0	0	0	0	0	0	0	0	0	1	1	0	0	0	0	0	0	1	1	1	1	1	1	0	1	0	1	0	0	1	0	0	0	0	0	0	0	0	0
11C26	20	0	0	1	1	1	1	0	0	0	0	0	1	0	0	0	0	1	0	1	0	0	0	0	0	0	0	0	1	1	1	1	1	0	1	0	1	0	0	1	0	0	0	0	0	0	0	0	1
11c5	5	0	0	0	0	1	0	0	0	0	0	0	0	0	0	0	0	0	0	0	0	0	0	0	0	0	0	0	0	0	0	0	0	0	0	0	0	0	0	0	0	1	0	0	0	0	0	1	0
11d8	3	0	0	0	0	0	0	1	0	0	0	0	0	0	0	0	0	0	0	0	0	0	0	0	0	0	0	0	0	0	0	0	0	0	0	0	0	0	0	0	0	0	0	0	0	0	0	1	0
11f1	15	1	1	0	1	0	0	0	0	0	0	0	0	0	0	0	0	0	0	1	0	0	0	0	0	0	0	0	1	1	1	1	1	0	1	0	1	1	1	1	0	0	0	0	0	0	0	0	0
11f2	19	0	0	0	1	0	0	0	0	0	0	0	0	0	0	0	0	0	0	1	0	0	0	0	0	0	0	0	1	1	1	1	1	1	1	0	1	1	0	1	0	0	0	1	1	0	0	0	0
11f4	15	1	1	0	1	0	0	0	0	0	0	0	0	0	0	0	0	0	0	1	0	0	0	0	0	0	0	0	1	1	1	1	1	0	1	0	1	1	1	1	0	0	0	0	0	0	0	0	0
11f5	18	0	0	0	1	0	0	0	0	0	0	0	0	0	0	0	0	1	0	1	1	0	0	0	0	0	0	0	1	1	1	1	1	1	1	0	1	1	0	1	0	0	0	0	0	0	0	0	0
11f7	13	0	0	1	1	1	1	0	0	0	0	0	1	0	0	0	0	1	0	1	0	0	0	0	0	0	0	0	0	0	0	0	0	0	0	0	0	0	0	0	0	0	0	0	0	0	0	0	1
11f8	20	0	0	1	1	0	1	0	0	0	0	0	0	0	0	0	0	0	0	1	0	0	0	0	0	0	0	0	1	1	1	1	1	1	1	0	1	1	0	1	0	0	0	1	1	1	1	0	1
12a1	11	0	0	0	0	0	0	0	0	0	0	0	0	0	0	0	0	0	1	1	0	0	0	0	0	0	0	1	1	1	0	1	1	0	0	0	1	0	0	1	0	0	0	0	0	0	0	1	0
12a4	14	0	0	0	0	0	0	0	0	0	0	0	0	0	0	0	0	0	0	1	0	0	0	0	0	0	0	1	1	1	0	1	1	0	0	0	1	0	0	1	0	0	0	1	1	0	0	0	0
12a5	14	0	0	0	0	0	0	0	0	0	0	0	0	0	0	0	0	0	0	1	0	0	0	0	0	0	0	1	1	1	0	1	1	0	0	0	1	0	0	1	0	0	0	1	1	0	0	0	0
12b1	19	1	1	1	1	1	1	0	0	0	0	0	1	0	0	0	0	0	0	1	0	0	0	0	0	0	0	0	1	1	1	1	1	0	1	0	1	1	1	1	0	0	0	0	0	0	0	0	1
12b3	3	0	0	0	0	0	0	0	0	0	0	0	0	0	0	0	0	0	1	0	0	0	0	0	0	0	0	0	0	0	0	0	0	0	0	0	0	0	0	0	0	0	0	0	0	0	0	1	0
12b4	18	0	0	1	1	1	1	0	0	0	0	0	1	0	0	0	0	0	0	0	0	0	0	0	0	0	0	0	0	0	1	0	1	1	1	0	1	1	1	0	0	0	0	0	0	0	0	0	1
12c1	14	0	0	0	0	0	0	0	0	0	0	0	0	0	0	0	0	1	0	1	0	0	0	0	0	0	0	1	1	1	1	1	1	1	1	0	1	1	1	1	0	0	0	0	0	0	0	0	0
12c11	13	0	0	0	0	0	0	0	0	0	0	0	0	0	0	0	0	0	0	0	0	0	0	0	0	0	0	0	1	1	0	1	1	0	0	0	1	0	0	1	0	0	0	1	1	1	1	1	0
12c2	10	0	0	0	0	0	0	0	0	0	0	0	0	0	0	0	0	0	1	1	0	0	0	0	0	0	0	1	1	1	0	1	1	0	0	0	1	0	0	1	0	0	0	0	0	0	0	0	0
12c20	13	0	0	0	0	1	0	0	0	0	0	0	0	0	0	0	0	0	0	1	0	0	0	0	0	0	0	0	1	1	1	1	1	0	1	0	1	1	0	1	0	1	0	0	0	0	0	0	0
12c24	2	0	0	0	0	0	0	0	0	0	0	0	0	0	0	0	0	0	0	1	0	0	0	0	0	0	0	1	0	0	0	0	0	0	0	0	0	0	0	0	0	0	0	0	0	0	0	0	0
12c4	13	0	0	0	0	0	0	0	0	0	0	0	1	0	0	0	0	0	0	1	0	0	0	0	0	1	0	0	1	1	1	1	1	0	1	0	1	1	0	1	0	1	0	0	0	0	0	0	0
12c5	8	0	0	0	0	0	0	0	0	0	0	0	1	0	0	0	0	0	1	1	1	0	0	0	0	0	0	0	0	0	0	0	0	0	0	0	0	0	0	0	0	0	0	0	0	1	1	1	0
12c6	13	0	0	0	1	0	0	0	0	0	0	0	0	0	0	0	0	0	0	1	0	0	0	0	0	0	0	0	1	1	1	1	1	0	1	0	1	1	0	1	0	0	0	1	1	0	0	0	0
12c7	7	0	0	0	0	0	0	0	0	0	0	0	0	0	0	0	0	0	1	1	1	0	0	0	0	0	0	0	0	0	0	0	0	0	0	0	0	0	0	0	0	0	0	0	0	1	1	1	0
12c8	8	0	0	0	0	0	0	0	0	0	0	0	1	0	0	0	0	0	1	1	1	0	0	0	0	0	0	0	0	0	0	0	0	0	0	0	0	0	0	0	0	0	0	0	0	1	1	1	0
12d1	11	0	0	0	0	0	0	0	0	0	0	0	0	0	0	0	0	0	1	1	0	0	0	0	0	0	0	1	1	1	0	1	1	0	0	0	1	0	0	1	0	0	0	0	0	0	0	1	0
12d3	11	0	0	0	0	0	0	0	0	0	0	0	0	0	0	0	0	0	1	1	0	0	0	0	0	0	0	1	1	1	0	1	1	0	0	0	1	0	0	1	0	0	0	0	0	0	0	1	0
12d5	18	0	0	0	1	0	0	0	0	0	0	0	0	0	0	0	0	1	0	1	0	0	0	0	0	0	0	1	1	1	1	1	1	1	1	0	1	1	1	1	0	0	0	0	0	1	1	1	0
12d7	17	0	0	0	0	0	0	0	0	0	1	0	1	0	0	0	0	0	0	1	0	0	0	0	0	0	0	0	1	1	0	1	1	1	0	0	1	1	0	1	0	0	0	0	0	1	1	0	0
12e5	18	0	0	0	1	0	0	0	0	0	0	0	0	0	0	0	0	1	0	1	0	0	0	0	0	0	0	1	1	1	1	1	1	1	1	0	1	1	1	1	0	0	0	0	0	1	1	1	0
12f2	14	0	0	0	0	0	0	0	0	0	0	0	0	0	0	0	0	0	0	1	0	0	0	0	0	0	0	0	1	1	1	1	1	0	1	0	1	1	0	1	0	0	0	0	0	0	0	0	0
12f3	13	0	0	0	0	0	0	0	0	0	0	0	0	0	0	0	0	0	0	0	0	0	1	0	0	0	1	1	1	0	1	0	1	1	1	0	1	1	1	0	0	1	0	0	0	0	0	0	0
12f4	11	0	0	0	0	0	0	0	0	0	0	0	0	0	0	0	0	0	1	1	0	0	0	0	0	0	0	1	1	1	0	1	1	0	0	0	1	0	0	1	0	0	0	0	0	0	0	1	0
12f5	9	0	0	0	0	0	0	0	0	0	0	0	0	0	0	0	0	0	0	1	0	0	0	0	0	0	0	0	1	1	0	1	1	0	0	0	1	0	0	1	0	1	0	0	0	0	0	0	0
12f5-old	11	0	0	0	0	0	0	0	0	0	0	0	0	0	0	0	0	0	1	1	0	0	0	0	0	0	0	1	1	1	0	1	1	0	0	0	1	0	0	1	0	0	0	0	0	0	0	1	0
12f7	11	0	0	0	0	0	0	0	0	0	0	0	0	0	0	0	0	0	1	1	0	0	0	0	0	0	0	1	1	1	0	1	1	0	0	0	1	0	0	1	0	0	0	0	0	0	0	1	0
12f9	17	0	0	1	0	1	0	0	0	0	0	0	1	0	0	0	0	0	0	1	0	0	0	0	0	0	0	1	1	1	1	1	1	1	1	0	1	1	1	1	0	0	0	0	0	0	0	0	1
13a2	11	0	0	0	0	0	0	0	0	0	0	0	0	0	0	0	0	0	1	1	0	0	0	0	0	0	0	1	1	1	0	1	1	0	0	0	1	0	0	1	0	0	0	0	0	0	0	1	0
13b2	0	0	0	0	0	0	0	0	0	0	0	0	0	0	0	0	0	0	0	0	0	0	0	0	0	0	0	0	0	0	0	0	0	0	0	0	0	0	0	0	0	0	0	0	0	0	0	0	0
13b3	9	1	1	1	1	1	1	0	0	0	0	0	1	0	0	0	1	0	0	0	0	0	0	0	0	0	0	0	0	0	0	0	0	0	0	0	0	0	0	0	0	0	0	0	0	0	0	0	1
13b5	11	1	1	0	1	0	0	0	0	0	0	0	0	0	0	0	1	0	0	1	0	0	0	0	0	0	0	0	1	1	0	1	1	0	0	0	1	0	0	1	0	0	0	0	0	0	0	0	0
13c3	20	0	0	0	0	0	0	0	0	0	0	0	0	0	0	0	0	0	0	1	1	0	0	0	0	0	0	0	0	0	1	0	1	1	1	0	1	1	1	0	0	0	0	0	0	0	0	0	0
13d1	11	0	0	0	0	0	0	0	0	0	0	0	0	0	0	0	0	0	1	1	0	0	0	0	0	0	0	1	1	1	0	1	1	0	0	0	1	0	0	1	0	0	0	0	0	0	0	1	0
13d2	11	0	0	0	0	0	0	0	0	0	0	0	0	0	0	0	0	0	1	1	0	0	0	0	0	0	0	1	1	1	0	1	1	0	0	0	1	0	0	1	0	0	0	0	0	0	0	1	0
13e3	13	1	1	0	0	0	0	0	0	0	0	0	1	0	0	0	0	0	0	1	0	0	0	0	0	0	0	1	1	0	1	0	1	1	1	0	1	1	1	0	0	0	0	0	0	0	0	0	0
13e4	12	1	1	0	0	0	0	0	0	0	0	0	0	0	0	0	0	0	0	1	0	0	0	0	0	0	0	1	1	0	1	0	1	1	1	0	1	1	1	0	0	0	0	0	0	0	0	0	0
13e5	12	1	1	0	0	0	0	0	0	0	0	0	0	0	0	0	0	0	0	1	0	0	0	0	0	0	0	1	1	0	1	0	1	1	1	0	1	1	1	0	0	0	0	0	0	0	0	0	0
13f2	15	0	0	0	1	0	0	0	0	0	0	0	1	0	1	0	0	0	0	1	0	0	0	0	0	0	0	0	1	1	1	1	1	0	1	0	1	0	0	1	0	0	0	1	1	0	0	1	0
13f3	11	0	0	0	0	0	0	0	0	0	0	0	0	0	0	0	0	0	1	1	0	0	0	0	0	0	0	1	1	1	0	1	1	0	0	0	1	0	0	1	0	0	0	0	0	0	0	1	0
13f4	16	0	0	0	0	0	0	0	0	0	0	0	0	0	0	0	0	0	0	0	0	0	0	0	0	0	0	0	1	1	1	1	1	1	1	0	1	1	1	1	0	0	0	0	0	0	0	0	0
13f5-2	7	0	0	0	1	0	0	0	0	0	0	0	0	0	0	0	0	0	0	0	0	0	0	0	0	0	0	0	0	0	0	0	0	0	0	0	0	0	0	0	0	0	0	0	0	0	0	0	0
13h1	6	0	0	0	0	0	0	0	0	0	0	0	0	0	0	0	0	0	1	0	1	0	0	0	0	0	0	0	0	0	0	0	0	0	0	0	0	0	0	0	0	0	0	0	0	0	0	0	0
13h2	11	0	0	0	0	0	0	0	0	0	0	0	0	0	0	0	0	0	1	1	0	0	0	0	0	0	0	1	1	1	0	1	1	0	0	0	1	0	0	1	0	0	0	0	0	0	0	1	0
13h3	15	0	0	0	1	1	0	0	0	0	0	0	1	0	0	0	0	0	0	1	0	0	0	0	0	0	0	0	1	1	1	1	1	0	1	0	1	0	0	1	0	0	0	1	1	0	0	1	0
13h4	7	0	0	0	0	0	0	0	0	0	0	0	1	0	0	0	0	0	1	0	1	0	0	0	0	0	0	0	0	0	0	0	0	0	0	0	0	0	0	0	0	0	0	0	0	0	0	0	0
13h5	3	0	0	0	0	0	0	0	0	0	0	0	1	0	0	0	0	0	0	0	0	0	0	0	0	1	0	0	0	0	0	0	0	0	0	0	0	0	0	0	0	0	0	0	0	0	0	1	0
13J3	15	0	0	0	1	0	0	0	0	0	0	0	1	0	0	0	0	0	0	0	0	0	0	0	0	0	0	0	1	1	1	1	1	1	1	0	1	1	1	1	0	0	0	1	0	0	0	1	0
13j4	11	0	0	0	0	0	0	0	0	0	0	0	0	0	0	0	0	0	1	1	0	0	0	0	0	0	0	1	1	1	0	1	1	0	0	0	1	0	0	1	0	0	0	0	0	0	0	1	0
13j6	3	0	0	0	0	0	0	0	0	0	0	0	0	0	0	0	0	0	1	0	0	0	0	0	0	0	0	0	0	0	0	0	0	0	0	0	0	0	0	0	0	0	0	0	0	0	0	1	0
13j7	16	0	0	0	1	0	0	0	0	0	0	0	1	0	0	0	0	0	0	1	0	0	0	0	0	0	0	0	1	1	1	1	1	1	1	0	1	1	1	1	0	0	0	1	0	0	0	1	0
1916D18	17	0	0	0	0	0	0	0	0	0	0	0	0	0	0	0	0	0	0	1	0	0	0	0	0	0	0	1	1	1	1	1	1	1	1	0	1	1	1	1	0	0	0	0	0	0	0	0	0
1916D6	6	0	0	0	0	0	0	0	0	0	0	0	0	0	0	0	0	0	1	0	1	0	0	0	0	0	0	0	0	0	0	0	0	0	0	0	0	0	0	0	0	0	0	0	0	0	0	0	0
1919D3	6	0	0	0	0	0	0	0	0	0	0	0	0	0	0	0	0	0	1	0	0	0	0	0	0	0	0	0	0	0	0	0	0	0	0	0	0	0	0	0	1	1	1	0	0	0	0	0	0
1919D62	6	0	0	0	0	0	0	0	0	0	0	0	0	0	0	0	0	0	1	0	0	0	0	0	0	1	0	0	0	0	0	0	0	0	0	0	0	0	0	0	1	1	1	0	0	0	0	0	0
446_c	22	1	1	0	1	0	0	0	0	0	0	0	1	0	0	0	0	0	0	1	0	0	0	0	0	0	0	0	1	1	1	1	1	1	1	0	1	1	1	1	0	0	0	0	0	1	1	0	0
447_c	24	1	1	0	1	0	0	0	0	0	0	0	1	0	0	0	0	0	0	1	0	0	1	0	0	0	1	0	1	1	1	1	1	1	1	0	1	1	1	1	0	0	0	0	0	1	1	0	0
448_c	12	0	0	1	0	0	0	0	0	0	0	0	0	0	0	0	0	0	0	1	0	0	0	0	0	0	0	0	1	1	0	1	1	0	0	0	1	0	0	1	0	0	0	0	0	1	1	0	1
449_c	14	0	0	0	0	0	0	0	0	0	0	0	0	0	0	0	0	0	0	1	0	0	0	0	0	0	0	0	1	1	0	1	1	0	0	0	1	0	0	1	0	0	0	0	0	1	1	0	0
450_c	14	1	1	0	0	0	0	1	0	0	0	0	1	0	0	0	0	0	0	0	0	0	0	0	0	0	0	0	0	0	0	0	0	0	0	0	0	0	0	0	0	0	0	0	0	1	1	0	0
451_c	19	0	0	1	0	1	0	1	0	0	0	0	1	0	0	0	0	0	0	1	0	0	0	0	0	0	0	0	1	1	0	1	1	0	0	0	1	0	0	1	0	0	0	0	0	1	1	0	1
452_c	20	1	1	1	0	1	0	1	0	0	0	0	0	0	0	0	0	0	0	1	0	0	0	0	0	0	0	0	1	1	0	1	1	0	0	0	1	0	0	1	0	0	0	0	0	1	1	1	1
453_c	26	1	1	0	1	1	0	0	0	0	0	0	1	0	0	0	0	0	0	0	0	0	0	0	0	0	0	0	1	1	1	1	1	0	1	0	1	0	1	1	0	0	0	1	1	1	1	0	0
454_c	15	0	0	1	1	1	0	0	0	0	0	0	1	0	0	0	0	0	0	1	0	0	0	0	0	0	0	0	1	1	1	1	1	0	1	0	1	1	0	1	0	0	0	0	0	0	0	0	1
455_c	15	0	0	0	1	0	0	0	0	0	0	0	1	0	0	0	0	0	0	1	0	0	0	0	0	0	0	0	0	0	1	0	1	1	1	0	1	1	1	0	0	0	0	1	1	0	0	1	0
457_c	16	1	1	0	1	0	0	0	0	0	0	0	0	0	0	0	0	0	1	0	1	0	1	0	0	0	1	0	0	0	1	0	1	1	1	0	1	1	1	0	0	0	0	0	0	1	1	0	0
458_c	20	0	0	0	0	0	0	0	0	0	0	0	1	0	0	0	0	0	0	1	0	0	1	0	0	0	1	0	1	1	1	1	1	1	1	0	1	1	1	1	0	0	0	0	0	1	1	0	0
459_c	18	0	0	1	1	0	0	0	0	0	0	0	1	0	0	0	0	0	0	1	0	0	0	0	0	0	0	0	1	1	1	1	1	1	1	0	1	1	0	1	0	0	0	0	0	1	1	0	1
460_c	18	1	1	0	1	1	0	0	0	0	0	0	1	0	0	0	0	0	1	0	1	0	1	0	0	0	1	0	0	0	1	0	1	1	1	0	1	1	1	0	0	0	0	0	0	1	1	0	0
461_c	15	0	0	1	1	1	0	0	0	0	0	0	1	0	0	0	0	1	0	1	0	0	1	0	0	0	1	0	0	0	0	0	0	0	0	0	0	0	0	0	0	0	0	1	1	0	0	0	1
462_c	23	0	0	1	1	1	0	0	0	0	0	0	0	0	0	0	0	0	0	1	0	0	0	0	0	0	0	0	1	1	1	1	1	0	1	0	1	1	0	1	0	0	0	0	0	1	1	0	1
463_c	22	0	0	1	0	0	0	0	1	0	0	0	1	0	0	0	0	0	0	0	0	0	0	0	0	0	0	0	0	0	1	0	1	1	1	0	1	1	1	0	0	0	0	0	0	1	1	0	1
464_c	5	0	0	0	0	0	0	0	0	0	0	0	1	0	0	0	0	0	0	0	0	0	0	0	0	0	0	0	0	0	0	0	0	0	0	0	0	0	0	0	0	0	0	1	1	0	0	1	0
465_c	5	0	0	0	0	0	0	0	0	0	0	0	1	0	0	0	0	0	0	0	0	0	0	0	0	0	0	0	0	0	0	0	0	0	0	0	0	0	0	0	0	0	0	1	1	0	0	1	0
466_c	5	0	0	0	0	0	0	0	0	0	0	0	1	0	0	0	0	0	0	0	0	0	0	0	0	0	0	0	0	0	0	0	0	0	0	0	0	0	0	0	0	0	0	1	1	0	0	1	0
467_c	5	0	0	0	0	1	0	0	0	0	0	0	1	0	0	0	0	0	0	0	0	0	0	0	0	0	0	0	0	0	0	0	0	0	0	0	0	0	0	0	0	0	0	1	1	0	0	1	0
471_c	20	1	1	1	1	1	0	0	0	0	0	0	0	0	0	0	0	0	0	1	0	0	0	0	0	0	0	0	1	1	1	1	1	0	1	0	1	1	0	1	0	1	0	0	0	1	1	0	1
472_c	25	0	0	1	1	1	1	0	0	0	0	0	1	0	1	0	0	0	0	1	0	0	0	0	0	0	0	1	1	1	1	1	1	1	1	0	1	1	1	1	0	0	0	0	0	1	1	0	1
473_c	10	0	0	0	0	0	0	0	0	0	0	0	1	0	0	0	0	0	1	0	0	0	0	0	0	0	0	0	0	0	0	0	0	0	0	0	0	0	0	0	0	0	0	1	1	1	1	0	0
474_c	15	0	0	1	0	1	0	0	0	0	0	0	0	0	0	0	0	0	0	1	0	0	0	0	0	0	0	0	0	0	1	0	1	1	1	0	1	1	1	0	0	0	0	0	0	0	0	1	1
475_c	20	0	0	0	0	1	0	0	0	0	0	0	0	0	0	0	0	0	1	1	1	0	0	0	0	0	0	0	0	0	1	0	1	1	1	0	1	1	1	0	0	0	0	0	0	1	1	0	0
477_c	21	0	0	0	0	1	0	0	0	0	0	0	1	0	0	0	0	0	1	1	1	0	0	0	0	0	0	0	0	0	1	0	1	1	1	0	1	1	1	0	0	0	0	0	0	1	1	0	0
478_c	18	0	0	1	0	1	0	0	0	0	0	0	1	0	0	0	0	0	0	1	0	0	0	0	0	0	0	1	1	1	1	1	1	1	1	0	1	1	1	1	0	0	0	0	0	0	0	0	1
479_c	20	0	0	0	0	0	0	0	0	0	0	0	1	0	0	0	0	0	1	1	1	0	0	0	0	0	0	0	0	0	1	0	1	1	1	0	1	1	1	0	0	0	0	0	0	1	1	0	0
480_c	22	0	0	1	1	0	0	0	0	0	0	0	1	0	0	0	0	0	0	1	0	0	0	0	0	0	0	0	0	0	1	0	1	1	1	0	1	1	1	0	0	0	0	0	0	1	1	0	1
481_c	32	1	1	1	0	0	0	0	0	0	0	0	1	0	0	0	0	0	0	1	0	0	0	0	0	0	0	1	1	1	1	1	1	1	1	0	1	1	1	1	0	0	0	1	1	1	1	0	1
483_f	19	0	0	1	0	0	0	0	0	0	0	0	1	0	0	0	0	0	0	1	1	0	0	0	0	0	0	0	0	0	1	0	1	1	1	0	1	1	1	0	0	1	0	0	0	1	1	0	1
484_f	20	0	0	1	0	0	0	0	0	0	0	0	1	0	0	0	0	0	0	1	1	0	0	0	0	0	0	0	0	0	1	0	1	1	1	0	1	1	1	0	0	1	0	0	0	1	1	0	1
486_f	21	0	0	0	1	0	0	0	0	0	0	0	0	0	0	0	0	1	0	1	0	0	0	0	0	0	0	0	1	1	0	1	1	0	0	0	1	0	0	1	0	0	0	1	1	1	1	0	0
487_f	8	0	0	0	0	1	0	0	0	0	0	0	0	0	0	0	0	0	0	0	0	0	0	0	0	1	0	0	0	0	0	0	0	0	0	0	0	0	0	0	0	1	0	1	1	0	0	1	0
489_f	15	0	0	0	0	0	0	0	0	0	0	0	0	0	0	0	0	0	1	0	1	0	0	0	0	0	0	0	0	0	1	0	1	1	1	0	1	1	1	0	0	0	0	0	0	1	1	0	0
490_f	18	0	0	0	0	0	0	0	0	0	0	0	0	0	0	0	0	1	0	1	0	0	0	0	0	0	0	1	1	1	1	1	1	1	1	0	1	1	1	1	0	0	0	1	1	1	1	0	0
491_f	15	0	0	0	0	0	0	0	0	0	0	0	1	0	0	0	0	0	0	0	0	0	1	0	0	0	1	0	0	0	1	0	1	1	1	0	1	1	1	0	0	0	0	0	0	0	0	0	0
492_f	19	1	1	1	0	1	0	0	0	0	0	0	0	0	0	0	0	0	0	1	0	0	0	0	0	0	0	0	1	1	0	1	1	0	0	0	1	0	0	1	0	0	0	0	0	0	0	1	1
493_f	13	1	1	0	0	0	0	0	0	0	0	0	0	0	0	0	0	0	0	1	0	0	0	0	0	0	0	0	1	1	0	1	1	0	0	0	1	0	0	1	0	0	0	0	0	0	0	0	0
494_f	18	0	0	0	0	0	0	0	0	0	0	0	0	0	0	0	0	1	0	1	0	0	0	0	0	0	0	1	1	1	1	1	1	1	1	0	1	1	1	1	0	0	0	1	1	1	1	0	0
495_f	20	0	0	0	0	0	0	0	0	0	0	0	0	0	0	0	0	0	0	1	0	0	0	0	0	0	0	0	1	1	1	1	1	1	1	0	1	1	0	1	0	0	0	0	0	1	1	0	0
496_f	10	0	0	0	0	1	0	0	0	0	0	0	1	0	0	0	0	0	0	1	0	0	0	0	0	0	0	0	0	0	0	0	0	0	0	0	0	0	0	0	0	1	0	1	1	0	0	0	0
497_f	7	0	0	1	0	1	0	0	0	0	0	0	1	0	0	0	0	0	0	0	0	0	0	0	0	0	0	0	0	0	0	0	0	0	0	0	0	0	0	0	0	0	0	0	0	1	1	0	1
498_f	9	0	0	0	0	0	0	1	0	0	0	0	1	0	0	0	0	0	0	0	1	0	0	0	0	0	0	0	0	0	0	0	0	0	0	0	0	0	0	0	0	0	0	0	0	1	1	0	0
503_c	22	0	0	0	1	0	0	0	0	0	0	0	1	0	0	0	0	0	0	1	0	0	0	0	0	0	0	0	1	1	1	1	1	1	1	0	1	1	0	1	0	0	0	1	1	1	1	0	0
504_c	13	0	0	1	1	0	0	0	0	0	0	0	0	0	0	0	0	0	0	1	0	0	0	0	0	0	0	0	1	1	0	1	1	0	0	0	1	1	0	1	0	1	0	0	0	0	0	0	1
507_c	12	0	0	0	0	0	0	0	0	0	0	0	0	0	0	0	0	0	0	0	0	0	0	0	0	0	0	0	0	0	1	0	1	1	1	0	1	1	1	0	0	0	0	0	0	0	0	0	0
508_c	22	0	0	1	1	1	0	0	0	0	0	0	1	0	0	0	1	0	0	1	0	0	1	0	0	0	1	1	1	1	1	1	1	1	1	0	1	1	1	1	0	0	0	0	0	0	0	0	1
510_c	23	0	0	0	0	1	0	0	0	0	0	0	0	0	0	0	0	0	0	1	0	0	1	0	0	0	1	1	1	1	1	1	1	1	1	0	1	1	1	1	0	0	0	1	1	1	1	0	0
511_c	15	0	0	1	1	0	0	0	0	0	0	0	0	0	0	0	0	0	0	1	0	0	0	0	0	0	0	0	1	1	1	1	1	0	1	0	1	1	0	1	0	1	0	0	0	0	0	0	1
544_c	12	0	0	0	0	0	0	0	0	0	0	0	0	0	0	0	0	0	0	0	0	0	0	0	0	0	0	0	0	0	1	0	1	1	1	0	1	1	1	0	0	0	0	1	1	1	1	1	0
545_c	22	0	0	1	0	1	0	0	0	0	0	0	1	0	0	0	0	0	0	1	0	0	0	0	0	0	0	1	1	1	1	1	1	1	1	0	1	1	1	1	0	0	0	0	0	0	0	0	1
549_f	19	0	0	1	0	1	0	0	0	0	0	0	0	0	0	0	0	0	0	1	0	0	0	0	0	0	0	0	1	1	0	1	1	0	0	0	1	0	0	1	0	0	0	0	1	0	0	1	1
552_f	23	0	0	1	0	0	0	0	0	0	0	0	1	0	0	0	0	0	0	0	0	0	1	0	0	0	1	0	0	0	1	0	1	1	1	0	1	1	1	0	0	0	0	1	1	0	0	0	1
554_c	13	0	0	0	0	0	0	0	0	0	0	0	0	0	0	0	0	0	1	0	0	0	0	0	0	0	0	0	0	0	0	0	0	0	0	0	0	0	0	0	0	0	0	1	1	1	1	0	0
555_f	18	0	0	0	0	0	0	0	0	0	0	0	1	0	0	0	0	1	0	0	0	0	0	0	0	0	0	0	1	1	0	1	1	0	0	0	1	0	0	1	0	1	0	0	0	0	0	0	0
557_c	21	1	1	0	0	0	0	0	0	0	0	0	1	0	0	0	0	0	0	0	1	0	0	0	0	0	0	0	0	0	1	0	1	1	1	0	1	1	1	0	0	0	0	0	0	1	1	0	0
558_c	19	1	1	0	1	0	0	0	0	0	0	0	1	0	0	0	0	0	1	1	1	0	1	0	0	0	1	0	0	0	1	0	1	1	1	0	1	1	1	0	0	0	0	0	0	1	1	0	0
559_f	18	0	0	0	0	0	0	0	0	0	0	0	0	0	0	0	0	1	0	1	0	0	0	0	0	0	0	0	0	0	1	0	1	1	1	0	1	1	1	0	0	1	0	0	0	0	0	0	0
576_c	13	1	1	1	0	0	0	0	0	0	0	0	0	0	0	0	0	0	0	0	0	0	0	0	0	0	0	0	0	0	0	0	0	0	0	0	0	0	0	0	0	0	0	1	1	1	1	0	1
578_c	18	1	1	0	1	0	0	0	0	0	0	0	1	0	0	0	0	0	0	0	0	0	1	0	0	0	1	0	0	0	1	0	1	1	1	0	1	1	1	0	0	0	0	0	0	1	1	0	0
582_c	19	0	0	0	0	0	0	0	0	0	0	0	0	0	0	0	0	0	0	1	0	0	0	0	0	0	0	1	1	1	1	1	1	1	1	0	1	1	1	1	0	0	0	0	0	0	0	0	0
583_c	19	1	1	1	1	1	0	0	0	0	0	0	1	0	0	0	0	0	0	1	0	0	0	0	0	0	0	0	1	1	0	1	1	0	0	0	1	1	0	1	0	1	0	0	0	1	1	0	1
585_c	9	0	0	0	0	1	0	0	0	0	0	0	1	0	0	0	0	0	0	1	0	0	0	0	0	0	0	0	0	0	0	0	0	0	0	0	0	0	0	0	0	0	0	0	0	1	1	0	0
586_c	18	0	0	1	0	1	0	0	0	0	0	0	1	0	0	0	0	0	0	1	0	0	0	0	0	0	0	1	1	1	1	1	1	1	1	0	1	1	1	1	0	0	0	0	0	0	0	0	1
587_c	15	1	1	0	0	0	0	0	0	0	0	0	0	0	0	0	0	0	0	1	0	0	0	0	0	0	0	0	0	0	1	0	1	1	1	0	1	1	1	0	0	0	0	0	0	1	1	0	0
590_f	16	1	1	1	0	0	0	0	0	0	0	0	1	0	0	0	0	0	0	1	0	0	0	0	0	0	0	0	1	1	1	1	1	0	1	0	1	1	0	1	0	0	0	0	0	0	0	0	1
591_c	25	0	0	1	1	1	1	0	0	0	0	0	1	0	1	0	0	0	0	1	0	0	0	0	0	0	0	1	1	1	1	1	1	1	1	0	1	1	1	1	0	0	0	0	0	1	1	0	1
596_c	25	0	0	1	1	1	0	0	0	0	0	0	1	0	0	0	0	0	0	1	0	0	0	0	0	0	0	1	1	1	1	1	1	1	1	0	1	1	1	1	0	0	0	0	0	1	1	1	1
598_f	19	0	0	0	0	0	0	0	0	0	0	0	1	0	0	0	0	1	0	1	0	0	0	0	0	0	0	1	1	1	1	1	1	1	1	0	1	1	1	1	0	0	0	1	1	1	1	0	0
599_c	14	0	0	0	1	0	0	0	0	0	0	0	1	0	0	0	0	0	0	0	0	0	0	0	0	0	0	0	0	0	1	0	1	1	1	0	1	1	1	0	0	0	0	1	1	1	1	1	0
600_c	10	0	0	0	1	0	0	0	0	0	0	0	1	0	0	0	0	1	0	1	0	0	0	0	0	0	0	0	0	0	0	0	0	0	0	0	0	0	0	0	0	0	0	1	1	0	0	0	0
604_c	13	0	0	1	1	1	0	0	0	0	0	0	1	0	0	0	0	0	0	0	0	0	0	0	0	0	0	0	0	0	0	0	0	0	0	0	0	0	0	0	0	0	0	1	1	1	1	0	1
606_c	12	0	0	0	0	1	0	0	0	0	0	0	1	0	0	0	0	0	0	1	0	0	0	0	0	0	0	0	0	0	0	0	0	0	0	0	0	0	0	0	0	0	0	0	0	1	1	1	0
615_c	3	0	0	0	0	0	0	0	0	0	0	0	0	0	0	0	0	0	0	0	0	0	0	0	0	0	0	0	0	0	0	0	0	0	0	0	0	0	0	0	0	0	0	1	1	0	0	1	0
616_c	16	1	1	0	0	0	0	0	0	0	0	0	1	0	0	0	0	0	0	1	0	0	0	0	0	0	0	0	0	0	1	0	1	1	1	0	1	1	1	0	0	0	0	0	0	1	1	0	0
617_c	5	0	0	0	0	1	0	0	0	0	0	0	0	0	0	0	0	0	0	0	0	0	0	0	0	0	0	0	0	0	0	0	0	0	0	0	0	0	0	0	0	0	0	1	1	0	0	1	0
619_c	21	0	0	1	0	1	0	0	0	0	0	0	1	0	0	0	0	0	0	1	0	0	0	0	0	0	0	1	1	1	1	1	1	1	1	0	1	1	1	1	0	0	0	0	0	0	0	1	1
620_c	15	0	0	1	1	1	0	0	0	0	0	0	1	0	0	0	0	0	0	1	0	0	0	0	0	0	0	0	1	1	1	1	1	0	1	0	1	1	0	1	0	0	0	0	0	0	0	0	1
621_c	10	0	0	0	1	0	0	0	0	0	0	0	1	0	0	0	0	1	0	1	0	0	0	0	0	0	0	0	0	0	0	0	0	0	0	0	0	0	0	0	0	0	0	1	1	0	0	0	0
622_c	19	0	0	0	0	0	0	0	0	0	0	0	1	0	0	0	0	0	0	1	0	0	0	0	0	0	0	1	1	1	1	1	1	1	1	0	1	1	1	1	0	0	0	0	0	1	1	0	0
623_c	18	1	1	0	1	1	0	0	0	0	0	0	1	0	0	0	0	0	1	0	1	0	1	0	0	0	1	0	0	0	1	0	1	1	1	0	1	1	1	0	0	0	0	0	0	1	1	0	0
624_c	10	0	0	0	1	1	0	0	0	0	0	0	1	0	0	0	0	0	0	1	0	0	0	0	0	0	0	0	0	0	0	0	0	0	0	0	0	0	0	0	0	0	0	0	0	1	1	0	0
625_c	14	0	0	1	1	1	0	0	0	0	0	0	1	0	0	0	0	1	0	1	0	0	0	0	0	0	0	0	0	0	0	0	0	0	0	0	0	0	0	0	0	0	0	1	1	1	1	0	1
626_c	5	0	0	0	0	0	0	0	0	0	0	0	1	0	0	0	0	0	0	0	0	0	0	0	0	0	0	0	0	0	0	0	0	0	0	0	0	0	0	0	0	0	0	1	1	0	0	1	0
627_c	11	0	0	0	0	1	0	0	0	0	0	0	1	0	0	0	0	0	0	1	0	0	0	0	0	0	0	0	0	0	0	0	0	0	0	0	0	0	0	0	0	0	0	1	1	0	0	1	0
628_c	5	0	0	0	0	0	0	0	0	0	0	0	1	0	0	0	0	0	0	0	0	0	0	0	0	0	0	0	0	0	0	0	0	0	0	0	0	0	0	0	0	0	0	1	1	0	0	1	0
634_c	20	1	1	1	0	1	0	0	0	0	0	0	1	0	0	0	0	0	0	1	0	0	0	0	0	0	0	1	1	1	1	1	1	1	1	0	1	1	1	1	0	0	0	0	0	0	0	0	1
635_c	14	0	0	0	1	0	0	0	0	0	0	0	1	0	0	0	0	0	0	0	0	0	0	0	0	0	0	0	0	0	1	0	1	1	1	0	1	1	1	0	0	0	0	1	1	1	1	1	0
636_c	18	0	0	1	0	1	0	0	0	0	0	0	1	0	0	0	0	0	0	1	0	0	0	0	0	0	0	1	1	1	1	1	1	1	1	0	1	1	1	1	0	0	0	0	0	0	0	0	1
637_f	15	0	0	0	0	0	0	0	0	0	0	0	0	0	0	0	0	0	0	1	1	0	0	0	0	0	0	0	0	0	1	0	1	1	1	0	1	1	1	0	0	1	0	0	0	1	1	0	0
638_f	17	0	0	0	0	0	0	0	0	0	0	0	0	0	0	0	0	0	0	0	1	0	0	0	0	0	0	0	1	1	1	1	1	1	1	0	1	1	0	1	0	1	0	0	0	0	0	0	0
639_f	17	0	0	0	0	0	0	0	0	0	0	0	1	0	0	0	0	0	0	0	0	0	1	0	0	0	1	0	0	0	1	0	1	1	1	0	1	1	1	0	0	0	0	1	1	0	0	0	0
640_f	10	0	0	0	0	0	0	0	0	0	0	0	1	0	0	0	0	0	1	0	0	0	0	0	0	0	0	0	0	0	0	0	0	0	0	0	0	0	0	0	0	0	0	1	1	1	1	0	0
642_f	21	0	0	0	0	0	0	0	0	0	0	0	1	0	0	0	0	0	0	0	0	0	1	0	0	0	1	0	0	0	1	0	1	1	1	0	1	1	1	0	0	0	0	1	1	0	0	0	0
643_f	17	0	0	0	0	0	0	0	0	0	0	0	1	0	0	0	0	0	0	0	0	0	1	0	0	0	1	0	0	0	1	0	1	1	1	0	1	1	1	0	0	0	0	1	1	0	0	0	0
644_f	10	0	0	0	0	0	0	1	0	1	0	0	0	0	0	0	0	0	1	0	1	0	0	0	0	0	0	0	0	0	0	0	0	0	0	0	0	0	0	0	0	0	0	0	0	1	1	0	0
645_f	18	0	0	0	0	0	0	0	0	0	0	0	1	0	0	0	0	1	0	0	0	0	0	0	0	0	0	0	1	1	0	1	1	0	0	0	1	0	0	1	0	1	0	0	0	0	0	0	0
650_c	19	0	0	1	0	1	0	0	0	0	0	0	1	0	0	0	0	0	0	1	0	0	0	0	0	0	0	1	1	1	1	1	1	1	1	0	1	1	1	1	0	0	0	0	0	0	0	1	1
652_c	20	0	0	1	1	1	0	0	0	0	0	0	1	0	0	0	1	0	0	1	0	0	0	0	0	0	0	1	1	1	1	1	1	1	1	0	1	1	1	1	0	0	0	0	0	0	0	0	1
653_c	9	0	0	0	0	0	0	0	0	0	0	0	0	0	0	0	0	0	0	1	0	0	0	0	0	0	0	0	0	0	0	0	0	0	0	0	0	0	0	0	0	0	0	0	0	1	1	0	0
654_c	22	0	0	0	0	1	0	0	0	0	0	0	0	0	0	0	0	0	0	1	0	0	0	0	0	0	1	1	1	1	1	1	1	1	1	0	1	1	1	1	0	0	0	1	1	1	1	0	0
655_c	10	0	0	0	0	0	0	0	0	0	0	0	1	0	0	0	0	0	0	1	0	0	0	0	0	0	0	0	0	0	0	0	0	0	0	0	0	0	0	0	0	0	0	0	0	1	1	0	0
674_c	16	1	1	0	0	0	0	0	0	0	0	0	1	0	0	0	0	0	0	1	0	0	0	0	0	0	0	0	0	0	1	0	1	1	1	0	1	1	1	0	0	0	0	0	0	1	1	0	0
676_c	19	0	0	0	0	0	0	0	0	0	0	0	0	0	0	0	0	0	1	1	1	0	0	0	0	0	0	0	0	0	1	0	1	1	1	0	1	1	1	0	0	0	0	0	0	1	1	0	0
678_c	19	0	0	0	1	0	0	0	0	0	0	0	0	0	0	0	0	0	0	1	0	0	0	0	0	0	0	1	1	1	1	1	1	1	1	0	1	1	1	1	0	0	0	0	0	1	1	0	0
681_f	13	0	0	0	0	0	0	0	0	0	0	0	0	0	0	0	0	0	0	0	1	0	0	0	0	0	0	0	0	0	1	0	1	1	1	0	1	1	1	0	0	1	0	0	0	0	0	0	0
683_f	22	0	0	0	0	0	0	0	0	0	0	0	0	0	0	0	0	0	0	1	0	0	1	0	0	0	1	1	1	1	1	1	1	1	1	0	1	1	1	1	0	0	0	1	1	1	1	0	0
686_f	21	1	1	0	1	0	0	0	0	0	0	0	0	0	1	0	0	1	0	1	0	0	0	0	0	0	0	0	0	0	1	0	1	1	1	0	1	1	1	0	0	0	0	1	1	1	1	0	0
694_c	16	1	1	0	0	0	0	0	0	0	0	0	1	0	0	0	0	0	0	1	0	0	0	0	0	0	0	0	0	0	1	0	1	1	1	0	1	1	1	0	0	0	0	0	0	1	1	0	0
704_c	24	0	0	0	0	1	0	0	0	0	0	0	0	0	0	0	0	0	0	1	0	0	0	0	0	0	0	1	1	1	1	1	1	1	1	0	1	1	1	1	0	0	0	0	0	1	1	0	0
705_c	16	1	1	0	0	1	0	0	0	0	0	0	1	0	0	0	0	0	0	0	0	0	0	0	0	0	0	0	0	0	0	0	0	0	0	0	0	0	0	0	0	0	0	1	1	0	0	0	0
707_f	18	0	0	0	0	0	0	0	0	0	0	0	0	0	0	0	0	1	0	1	0	0	0	0	0	0	0	1	1	1	1	1	1	1	1	0	1	1	1	1	0	0	0	1	1	1	1	0	0
710_c	20	0	0	1	1	1	0	0	0	0	0	0	1	0	0	0	0	0	0	1	0	0	0	0	0	0	0	0	0	0	1	0	1	1	1	0	1	1	1	0	0	0	0	0	0	1	1	1	1
8#19.27	11	0	0	0	0	0	0	0	0	0	0	0	0	0	0	0	0	0	0	1	0	0	0	0	0	0	0	1	1	1	0	1	1	0	0	0	1	0	0	1	0	0	0	0	0	1	1	0	0
8#2-10.2	21	0	0	0	1	0	0	0	0	0	0	0	1	0	0	0	0	0	0	1	0	0	0	0	0	0	0	1	1	1	1	1	1	1	1	0	1	1	1	1	0	0	0	1	1	1	1	1	0
A016f	15	0	0	0	0	0	0	0	0	0	0	0	0	0	0	0	0	0	0	1	0	0	1	0	0	0	1	0	0	0	0	0	0	0	0	0	0	0	0	0	0	0	0	0	0	0	0	0	0
A025ch	12	0	0	0	0	0	0	0	0	0	0	0	1	0	0	0	0	0	0	1	0	0	0	0	0	0	0	0	1	1	0	1	1	0	0	0	1	0	0	1	0	0	0	0	0	0	0	0	0
A043ch	18	0	0	0	0	0	0	0	0	0	0	0	0	0	0	0	0	1	0	0	0	0	1	0	0	0	1	0	1	1	0	1	1	0	0	0	1	0	0	1	0	0	0	0	0	0	0	0	0
A043p1	4	0	0	0	0	0	0	0	0	0	0	0	0	0	0	0	0	0	0	0	0	0	0	0	0	0	0	0	0	0	0	0	0	0	0	0	0	0	0	0	0	0	0	0	0	0	0	0	0
A043p2	4	0	0	0	0	0	0	0	0	0	0	0	0	0	0	0	0	0	0	0	0	0	0	0	0	0	0	0	0	0	0	0	0	0	0	0	0	0	0	0	0	0	0	0	0	0	0	0	0
A053p	4	0	0	0	0	0	0	0	0	0	0	0	0	0	0	0	0	0	0	0	0	0	0	0	0	0	0	0	0	0	0	0	0	0	0	0	0	0	0	0	0	0	0	0	0	0	0	0	0
A054ch	5	0	0	0	0	0	0	0	0	0	0	0	1	0	0	0	0	0	0	0	0	0	0	0	0	0	0	0	0	0	0	0	0	0	0	0	0	0	0	0	0	0	0	0	0	0	0	0	0
A062p	13	0	0	0	0	0	0	0	0	0	0	0	1	0	0	0	0	0	0	1	0	0	0	0	0	0	0	0	1	1	1	0	1	1	1	0	0	1	1	0	0	0	0	0	0	0	0	0	0
B010p	19	0	0	0	0	0	0	0	0	0	0	0	1	0	0	0	0	0	0	1	0	0	0	0	0	0	0	0	1	1	1	1	1	1	1	0	1	1	0	1	0	0	0	0	0	0	0	0	0
B011ch	18	0	0	0	0	0	0	0	0	0	0	0	1	0	0	0	0	0	0	1	0	0	0	0	0	0	0	1	1	1	1	1	1	1	1	0	1	1	1	1	0	0	0	0	0	0	0	0	0
B013p1	11	0	0	0	0	0	0	0	0	0	0	0	0	0	0	0	0	0	0	1	0	0	0	0	0	0	0	0	0	0	0	0	0	0	0	0	0	0	0	0	0	0	0	1	1	0	0	0	0
B013p2	20	0	0	0	0	0	0	0	0	0	0	0	0	0	0	0	0	1	0	0	0	0	0	0	0	0	0	0	1	1	1	1	1	1	1	0	1	1	1	1	0	0	0	0	0	1	1	0	0
B019ch	18	0	0	0	1	1	0	0	0	0	0	1	0	0	0	0	0	0	0	1	0	0	0	0	0	0	0	0	1	1	1	1	1	1	1	0	1	1	0	1	0	0	0	0	0	0	0	0	0
B024ch	5	0	0	0	0	0	0	0	0	0	0	0	1	0	0	0	0	0	0	0	0	0	0	0	0	0	0	0	0	0	0	0	0	0	0	0	0	0	0	0	0	0	0	0	0	0	0	0	0
B030f	5	0	0	0	0	0	0	0	0	0	0	0	0	0	0	0	0	0	0	0	0	0	0	0	0	1	0	0	0	0	0	0	0	0	0	0	0	0	0	0	0	0	0	0	0	0	0	0	0
B042f	16	0	0	0	0	1	0	0	1	0	0	1	0	0	0	0	0	0	1	0	1	0	0	0	0	1	0	0	0	0	0	0	0	0	0	0	0	0	0	0	0	0	0	1	1	0	0	0	0
B062ch	17	0	0	0	0	0	0	0	0	0	0	0	0	0	0	0	0	0	0	1	0	0	0	0	0	0	0	1	1	1	1	1	1	1	1	0	1	1	1	1	0	0	0	0	0	0	0	0	0
BBZ2-6	13	0	0	0	0	0	0	1	0	0	0	0	0	0	0	0	0	1	0	1	0	0	0	0	0	0	0	0	1	1	1	1	1	1	1	0	1	1	0	1	0	0	0	0	0	0	0	0	0
BCE049	12	0	0	0	0	0	0	0	0	0	0	0	0	0	0	0	0	0	0	0	0	0	0	0	0	0	0	0	1	1	1	1	1	1	1	0	1	1	0	1	0	0	0	0	0	1	0	1	0
C008f	4	0	0	0	0	0	0	0	0	0	0	0	0	0	0	0	0	0	0	0	0	0	0	0	0	1	0	0	0	0	0	0	0	0	0	0	0	0	0	0	0	0	0	0	0	0	0	0	0
C013p	3	0	0	0	0	0	0	0	0	0	0	0	0	0	0	0	0	0	0	0	0	0	0	0	0	0	0	0	0	0	0	0	0	0	0	0	0	0	0	0	0	0	0	0	0	0	0	0	0
C017p	7	0	0	0	0	0	0	0	0	0	0	0	0	0	0	0	0	0	0	0	0	0	0	0	0	0	0	0	0	0	0	0	0	0	0	0	0	0	0	0	0	0	0	0	0	0	0	0	0
C023p	12	0	0	0	0	1	0	0	0	0	0	0	0	0	0	0	0	0	0	1	0	0	0	0	0	0	0	1	1	1	0	1	1	0	0	0	1	0	0	1	0	0	0	0	0	0	0	0	0
C035f	5	0	0	0	0	0	0	0	0	0	0	0	0	0	0	0	0	0	0	0	1	0	0	0	0	0	0	0	0	0	0	0	0	0	0	0	0	0	0	0	0	0	0	0	0	0	0	0	0
C83534	19	0	0	0	1	0	0	0	1	0	0	0	0	0	0	0	0	1	0	1	0	0	0	0	0	0	0	0	1	1	1	1	1	1	1	0	1	1	1	1	0	0	0	0	0	0	0	0	0
CCA14	14	0	0	0	1	0	0	0	0	0	0	0	0	0	0	0	0	0	0	0	0	1	0	1	1	0	0	0	0	0	1	0	1	1	1	0	1	1	1	0	0	0	0	0	0	1	1	1	0
CCA22	14	0	0	0	0	0	0	1	0	0	0	0	1	0	0	0	0	0	0	0	0	0	0	0	0	0	0	0	1	1	0	1	1	0	0	0	1	0	0	1	0	0	0	0	0	0	0	0	0
CCA47	14	0	0	0	1	0	0	0	0	0	0	0	0	0	0	0	0	0	0	0	0	1	0	1	1	0	0	0	0	0	1	0	1	1	1	0	1	1	1	0	0	0	0	0	0	1	1	1	0
CF10	11	0	0	0	0	0	0	0	0	0	0	0	0	0	0	0	0	0	0	1	0	0	0	0	0	0	0	0	1	1	0	1	1	0	0	0	1	0	0	1	0	0	0	1	1	1	1	0	0
Cnp7-24	7	0	0	0	0	1	0	0	0	0	0	0	0	0	0	0	0	1	0	1	0	0	0	0	0	0	0	0	0	0	0	0	0	0	0	0	0	0	0	0	0	0	0	0	0	0	0	0	0
Cnp7-8	14	0	0	0	1	0	0	0	0	0	0	0	0	0	0	0	0	0	0	1	0	0	0	0	0	0	0	1	1	1	1	1	1	1	1	0	1	1	1	1	0	0	0	0	0	0	0	0	0
cq9	15	1	1	0	0	0	0	0	0	0	0	0	0	0	0	0	0	0	0	1	0	0	0	0	0	0	0	1	1	1	1	1	1	0	1	0	1	0	0	1	0	0	0	1	1	0	0	1	0
D008p	5	0	0	0	0	0	0	1	0	0	0	0	1	0	0	0	0	0	0	0	0	0	0	0	0	0	0	0	0	0	0	0	0	0	0	0	0	0	0	0	0	0	0	0	0	0	0	0	0
D010p	4	0	0	0	0	0	0	0	0	0	0	0	0	0	0	0	0	0	0	0	0	0	0	0	0	0	0	0	0	0	0	0	0	0	0	0	0	0	0	0	0	0	0	0	0	0	0	0	0
D026p	10	0	0	0	0	0	0	0	0	0	0	0	0	0	0	0	0	0	0	0	0	0	0	0	0	0	0	0	0	0	0	0	0	0	0	0	0	0	0	0	0	0	0	1	1	0	0	0	0
D038f	5	0	0	0	0	0	0	0	0	0	0	0	0	0	0	0	0	0	0	0	1	0	0	0	0	0	0	0	0	0	0	0	0	0	0	0	0	0	0	0	0	0	0	0	0	0	0	0	0
D054ch	7	0	0	0	0	0	0	0	0	0	0	0	1	0	0	0	0	0	0	0	0	0	0	0	0	0	0	0	0	0	0	0	0	0	0	0	0	0	0	0	0	0	0	1	1	0	0	0	0
d6-5-1	9	0	0	0	0	0	0	0	0	0	0	0	0	0	0	0	0	1	0	1	0	0	0	0	0	0	0	0	0	0	1	0	1	1	1	0	1	1	1	0	0	0	0	0	0	0	0	0	0
D72	14	0	0	0	0	0	0	0	0	0	0	0	0	0	0	0	0	0	0	0	0	0	0	0	0	0	0	0	0	0	1	0	1	1	1	0	1	1	1	0	0	0	0	0	0	0	0	0	0
E.10.7.8#1	12	0	0	0	0	1	0	0	0	0	0	0	1	0	0	0	0	0	0	0	0	0	0	0	0	0	0	0	0	0	1	0	1	1	1	0	1	1	1	0	0	0	0	1	1	0	0	1	0
E.11-3-2009	13	0	0	0	0	1	0	0	0	0	0	0	1	0	0	0	0	1	0	1	0	0	0	0	0	0	0	0	1	1	0	1	1	0	0	0	1	0	0	1	0	0	0	1	1	0	0	1	0
E.CRLD04-2011	14	0	0	0	0	0	0	0	0	0	0	0	0	0	0	0	1	0	0	1	0	0	0	0	0	0	0	1	1	1	0	1	1	0	0	0	1	0	0	1	0	0	0	0	0	0	0	1	0
E.hw1-5f	18	0	0	0	1	1	0	0	0	0	0	0	1	0	0	0	0	0	0	1	0	0	0	0	0	0	0	1	1	1	1	1	1	1	1	0	1	1	1	1	0	0	0	0	0	0	0	1	0
E009f	5	0	0	0	0	0	0	0	0	0	0	0	0	0	0	0	0	0	0	0	1	0	0	0	0	0	0	0	0	0	0	0	0	0	0	0	0	0	0	0	0	0	0	0	0	0	0	0	0
E024p1	7	0	0	0	0	0	0	0	0	0	0	0	0	0	0	0	0	0	1	0	0	0	0	0	0	0	0	0	0	0	0	0	0	0	0	0	0	0	0	0	0	0	0	0	0	0	0	0	0
E024p2	12	0	0	0	0	0	0	0	0	0	0	0	1	0	0	0	0	0	0	0	1	0	0	0	0	0	0	0	0	0	0	0	0	0	0	0	0	0	0	0	0	1	0	0	0	0	0	0	0
E025f	14	0	0	0	0	0	0	0	0	0	0	0	0	0	0	0	0	0	0	1	0	0	0	0	0	0	0	1	1	1	0	1	1	0	0	0	1	0	0	1	0	0	0	1	1	0	0	0	0
E036p	13	0	0	0	0	0	0	1	0	0	0	0	1	0	0	0	0	0	0	1	0	0	0	0	0	0	0	1	1	1	0	1	1	0	0	0	1	0	0	1	0	0	0	0	0	0	0	0	0
E059f	6	0	0	0	1	0	0	0	0	0	0	0	0	0	0	0	0	0	0	0	0	0	0	0	0	0	0	0	0	0	0	0	0	0	0	0	0	0	0	0	0	0	0	0	0	0	0	0	0
E1-2-1-15	7	0	0	0	0	0	0	0	0	0	0	0	0	0	0	0	0	0	0	1	0	0	0	0	0	0	0	0	1	1	0	1	1	0	0	0	1	0	0	1	0	0	0	0	0	0	0	0	0
E16-4-1-16	7	0	0	0	0	0	0	0	0	0	0	0	0	0	0	0	0	0	0	1	0	0	0	0	0	0	0	0	1	1	0	1	1	0	0	0	1	0	0	1	0	0	0	0	0	0	0	0	0
E6-3-1-16	1	0	0	0	0	0	0	0	0	0	0	0	0	0	0	0	0	0	0	1	0	0	0	0	0	0	0	0	0	0	0	0	0	0	0	0	0	0	0	0	0	0	0	0	0	0	0	0	0
E8-1-1-16	7	0	0	0	0	0	0	0	0	0	0	0	0	0	0	0	0	0	0	0	0	0	0	0	0	0	0	0	1	1	0	1	1	0	0	0	1	0	0	1	0	0	0	0	0	0	0	0	0
E8#1-10.2	14	0	0	0	0	1	0	0	0	0	0	0	1	0	0	0	0	0	0	0	0	0	0	0	0	0	0	0	1	1	0	1	1	0	0	0	1	0	0	1	0	0	0	1	1	0	0	1	0
E9-2-1-15	7	0	0	0	0	0	0	0	0	0	0	0	0	0	0	0	0	0	0	1	0	0	0	0	0	0	0	0	1	1	0	1	1	0	0	0	1	0	0	1	0	0	0	0	0	0	0	0	0
ECCHD184	4	0	0	0	0	0	0	0	0	0	0	0	0	0	0	0	0	0	0	1	0	0	0	0	0	1	0	0	0	0	0	0	0	0	0	0	0	0	0	0	0	1	0	0	0	0	0	0	0
ECCWS199	4	1	1	0	0	0	0	0	0	0	0	0	0	0	0	0	0	0	0	0	1	0	0	0	0	0	0	0	0	0	0	0	0	0	0	0	0	0	0	0	0	0	0	0	0	0	0	0	0
ECGC3	1	0	0	0	1	0	0	0	0	0	0	0	0	0	0	0	0	0	0	0	0	0	0	0	0	0	0	0	0	0	0	0	0	0	0	0	0	0	0	0	0	0	0	0	0	0	0	0	0
ECRLC09	9	0	0	0	0	0	0	0	0	0	0	0	0	0	0	0	0	0	0	1	0	0	0	0	0	0	0	1	1	1	0	1	1	0	0	0	1	0	0	1	0	0	0	0	0	0	0	0	0
Ed10-4-2	10	0	0	0	0	0	0	0	0	0	0	0	0	0	0	0	0	0	0	1	0	0	0	0	0	0	0	0	1	1	1	1	1	0	1	0	1	1	0	1	0	0	0	0	0	0	0	0	0
Ed12-3-1	9	0	0	0	0	0	0	0	0	0	0	0	0	0	0	0	0	0	0	1	0	0	0	0	0	0	0	0	1	1	1	1	1	0	1	0	1	0	0	1	0	0	0	0	0	0	0	0	0
EDWP4	10	0	0	0	0	0	0	0	0	0	0	0	0	0	0	0	0	0	0	1	0	0	0	0	0	0	0	0	1	1	0	1	1	0	0	0	1	0	0	1	0	0	0	0	0	1	1	0	0
EDYC09-10	17	1	1	0	0	0	0	0	0	0	0	0	0	0	0	0	0	1	0	1	0	0	0	0	0	0	0	0	1	1	1	1	1	0	1	0	1	1	0	1	0	0	0	0	0	0	0	0	0
EDYC09-12	11	0	0	0	0	0	0	0	0	0	0	0	0	0	0	0	0	0	0	1	0	0	0	0	0	0	0	0	1	1	0	1	1	0	0	0	1	0	0	1	0	0	0	0	0	0	0	0	0
EDYC09-18	18	0	0	0	1	0	0	0	0	0	0	0	1	0	0	0	1	0	0	0	0	0	0	0	0	0	0	0	1	1	1	1	1	0	1	0	1	0	0	1	0	0	0	0	0	1	1	0	0
EDYC09-2	18	0	0	0	1	0	0	0	0	0	0	0	1	0	0	0	1	0	0	0	0	0	0	0	0	0	0	0	1	1	1	1	1	0	1	0	1	0	0	1	0	0	0	0	0	1	1	0	0
EDYC09-21	18	0	0	0	1	0	0	0	0	0	0	0	1	0	0	0	1	0	0	0	0	0	0	0	0	0	0	0	1	1	1	1	1	0	1	0	1	0	0	1	0	0	0	0	0	1	1	0	0
EDYC09-24	12	0	0	0	0	0	0	0	0	0	0	0	0	0	0	0	0	0	0	1	1	0	1	0	0	0	1	1	1	1	0	1	1	0	0	0	1	0	0	1	0	0	0	0	0	0	0	0	0
EDYC09-5	11	0	0	0	0	0	0	0	0	0	0	0	0	0	0	0	0	0	0	1	0	0	0	0	0	0	0	0	1	1	0	1	1	0	0	0	1	0	0	1	0	0	0	0	0	0	0	0	0
EDYC09-8	12	0	0	0	0	0	0	0	0	0	0	0	0	0	0	0	0	0	0	1	0	0	0	0	0	0	0	0	1	1	1	1	1	1	1	0	1	1	1	1	0	0	0	0	0	0	0	0	0
Eej2	13	0	0	0	0	0	0	0	0	0	0	0	0	0	0	0	0	0	0	1	0	0	0	0	0	0	0	1	1	1	1	1	1	1	1	0	1	1	1	1	0	0	0	0	0	0	0	0	0
EGD13	8	0	0	0	0	0	0	0	0	0	0	0	0	0	0	0	0	0	0	1	0	0	0	0	0	0	0	0	1	1	0	1	1	0	0	0	1	0	0	1	0	0	0	0	0	0	0	0	0
EK2009	0	0	0	0	0	0	0	0	0	0	0	0	0	0	0	0	0	0	0	0	0	0	0	0	0	0	0	0	0	0	0	0	0	0	0	0	0	0	0	0	0	0	0	0	0	0	0	0	0
En3-4	14	0	0	0	0	0	0	0	0	0	1	0	0	0	0	0	0	0	0	1	0	0	0	0	0	0	0	1	1	1	1	1	1	1	1	0	1	1	1	1	0	0	0	0	0	0	0	0	0
en6-1-1	12	0	0	0	0	0	0	0	0	0	0	0	0	0	0	0	0	0	0	1	0	0	0	0	0	0	0	0	1	1	1	1	1	0	1	0	1	0	0	1	0	0	0	0	0	1	1	0	0
en7-1	10	0	0	0	0	0	0	0	0	0	0	0	0	0	0	0	0	1	0	0	0	1	0	1	1	0	0	0	1	1	0	1	1	0	0	0	1	0	0	1	0	0	0	0	0	0	0	0	0
Eqsg1-4g	16	0	0	0	0	0	0	0	0	0	0	0	1	0	0	0	0	0	0	0	0	0	0	0	0	0	0	0	0	0	1	0	1	1	1	0	1	1	1	0	0	0	0	1	1	0	0	0	0
Eqsg1-5f	11	0	0	0	0	0	0	0	0	0	0	0	0	0	0	0	0	0	0	1	0	0	0	0	0	0	0	1	1	1	0	1	1	0	0	0	1	0	0	1	0	0	0	0	0	1	1	0	0
Eqsg1-6	19	0	0	0	1	0	0	0	0	0	0	0	1	0	0	0	0	0	0	1	0	0	0	0	0	0	0	1	1	1	1	1	1	0	1	0	1	1	0	1	0	0	0	1	1	1	1	1	0
EXF1-6-2013	19	0	0	1	1	0	1	0	0	0	0	0	1	0	0	0	0	0	0	1	0	0	0	0	0	0	0	0	1	1	1	1	1	0	1	0	1	1	0	1	0	0	0	1	1	0	0	1	1
ExPEC-XM	13	0	0	0	0	0	0	0	0	0	0	0	0	0	0	0	0	0	0	1	0	0	0	0	0	0	0	1	1	1	1	1	1	1	1	0	1	1	1	1	0	0	0	0	0	0	0	0	0
EYAP10-115	9	0	0	0	0	0	0	0	0	0	0	0	0	0	1	0	0	0	1	1	1	0	0	0	0	0	0	0	0	0	0	0	0	0	0	0	0	0	0	0	0	0	0	0	0	0	0	1	0
EYAP10-225	14	0	0	0	0	0	0	0	0	0	0	0	0	0	0	0	0	0	1	1	1	0	0	0	0	0	0	0	1	1	0	1	1	0	0	0	1	0	0	1	0	0	0	0	0	0	0	1	0
EYAP10-258	13	0	0	0	1	0	0	1	0	0	1	0	1	0	0	0	0	0	0	1	0	0	0	0	0	0	0	0	1	1	0	1	1	0	0	0	1	0	0	1	0	0	0	0	0	0	0	1	0
EZDK2	16	0	0	0	0	0	0	0	0	0	0	0	1	0	0	0	0	0	0	1	0	0	0	0	0	0	0	1	1	1	1	1	1	1	1	0	1	1	1	1	0	0	0	0	0	0	0	0	0
EZYP10-11	5	0	0	0	0	0	0	0	0	0	0	0	0	0	0	0	0	0	0	0	0	0	0	0	0	0	0	0	0	0	0	0	0	0	0	0	0	0	0	0	0	0	0	1	1	1	1	1	0
EZYP10-3	14	0	0	0	0	0	0	0	0	0	0	0	1	0	0	0	0	1	0	1	0	0	0	0	0	0	0	1	1	1	0	1	1	0	0	0	1	0	0	1	0	0	0	0	0	0	0	1	0
EZZ1-6	19	0	0	1	0	0	1	0	0	0	0	0	1	0	0	0	0	1	0	0	1	0	0	0	0	0	0	0	1	1	1	1	1	1	1	0	1	1	0	1	0	0	0	1	1	0	0	0	1
F004f	5	0	0	0	0	0	0	0	0	0	0	0	0	0	0	0	0	0	0	0	0	0	0	0	0	0	0	0	0	0	0	0	0	0	0	0	0	0	0	0	0	0	0	0	0	0	0	0	0
F012ca	6	0	0	0	0	0	0	0	0	0	0	0	0	0	0	0	0	0	0	1	0	0	0	0	0	0	0	0	0	0	0	0	0	0	0	0	0	0	0	0	0	1	0	0	0	0	0	0	0
F037p1	8	0	0	0	0	0	0	0	0	0	0	0	1	0	0	0	0	0	0	0	0	1	0	1	1	0	0	0	0	0	0	0	0	0	0	0	0	0	0	0	0	0	0	0	0	0	0	0	0
F037p2	8	0	0	0	0	0	0	0	0	0	0	0	1	0	0	0	0	0	0	0	0	1	0	1	1	0	0	0	0	0	0	0	0	0	0	0	0	0	0	0	0	0	0	0	0	0	0	0	0
F054ch	12	0	0	0	0	0	0	0	0	0	0	0	1	0	0	0	0	0	0	1	0	0	0	0	0	0	0	0	1	1	0	1	1	0	0	0	1	0	0	1	0	0	0	0	0	0	0	0	0
F056p	8	0	0	0	0	0	0	0	0	0	0	0	0	0	0	0	0	0	0	0	0	0	0	0	0	0	0	0	0	0	0	0	0	0	0	0	0	0	0	0	0	0	0	1	0	0	0	0	0
F060p	8	0	0	0	0	0	0	0	0	0	0	0	1	0	0	0	0	0	0	0	0	0	0	0	0	0	0	0	0	0	0	0	0	0	0	0	0	0	0	0	0	0	0	0	0	0	0	0	0
F56	14	0	0	0	0	0	0	0	0	0	0	0	0	0	0	0	0	1	0	1	0	0	0	0	0	0	0	0	1	1	1	1	1	1	1	0	1	1	1	1	0	0	0	0	0	0	0	1	0
FDK22	0	0	0	0	0	0	0	0	0	0	0	0	0	0	0	0	0	0	0	0	0	0	0	0	0	0	0	0	0	0	0	0	0	0	0	0	0	0	0	0	0	0	0	0	0	0	0	0	0
FSC3	7	0	0	0	0	0	0	0	0	0	0	0	0	0	0	0	0	0	0	0	0	0	0	0	0	0	0	0	0	0	0	0	0	0	0	0	0	0	0	0	0	0	0	1	1	0	0	0	0
FSD3	9	0	0	0	0	0	0	0	0	0	0	0	0	0	0	0	0	0	0	1	0	0	1	0	0	0	1	0	1	1	0	1	1	0	0	0	1	0	0	1	0	0	0	0	0	0	0	0	0
G003p	9	0	0	0	1	0	0	0	0	0	0	0	1	0	0	0	0	0	0	0	0	0	0	0	0	0	0	0	0	0	0	0	0	0	0	0	0	0	0	0	0	0	0	0	0	0	0	0	0
G005p	11	0	0	1	0	0	0	0	0	0	0	0	1	0	0	0	0	0	0	1	0	0	0	0	0	0	0	1	1	1	0	1	1	0	0	0	1	0	0	1	0	0	0	0	0	0	0	0	1
G006p1	6	0	0	0	0	1	0	0	0	0	0	0	1	0	1	0	0	0	0	0	0	0	0	0	0	0	0	0	0	0	0	0	0	0	0	0	0	0	0	0	0	0	0	0	0	0	0	0	0
G006p2	6	0	0	0	0	1	0	0	0	0	0	0	1	0	0	0	0	0	0	0	0	0	0	0	0	0	0	0	0	0	0	0	0	0	0	0	0	0	0	0	0	0	0	0	0	0	0	0	0
G007p	18	0	0	0	1	0	0	0	0	0	0	0	1	0	0	0	0	1	0	0	1	0	0	0	0	0	0	0	1	1	1	1	1	1	1	0	1	1	0	1	0	0	0	0	0	0	0	0	0
G008p	12	0	0	0	0	1	0	0	0	0	0	0	1	0	0	0	0	0	0	0	0	0	0	0	0	0	0	0	1	1	0	1	1	0	0	0	1	0	0	1	0	0	0	0	0	0	0	0	0
G009p1	8	0	0	0	0	0	0	0	0	0	0	0	1	0	0	0	0	0	0	0	0	0	0	0	0	0	0	0	0	0	0	0	0	0	0	0	0	0	0	0	0	0	0	1	1	0	0	0	0
G009p2	12	0	0	0	0	0	0	0	0	0	0	0	0	0	0	0	0	0	0	0	1	0	0	0	0	1	0	0	0	0	0	0	0	0	0	0	0	0	0	0	0	0	0	0	0	1	1	0	0
G017p	14	0	0	1	0	0	0	0	0	0	0	0	1	0	0	0	0	0	0	1	0	0	0	0	0	0	0	1	1	1	0	1	1	0	0	0	1	0	0	1	0	0	0	0	0	0	0	0	1
G029f	4	0	0	0	0	0	0	0	0	0	0	0	0	0	0	0	0	0	0	0	0	0	0	0	0	0	0	0	0	0	0	0	0	0	0	0	0	0	0	0	0	0	0	0	0	0	0	0	0
G029p	7	0	0	0	0	0	0	0	0	0	0	0	0	0	0	0	0	0	0	0	0	0	0	0	0	0	0	0	0	0	0	0	0	0	0	0	0	0	0	0	0	0	0	1	1	0	0	0	0
G041p	12	0	0	0	0	0	0	0	0	0	0	0	0	0	0	0	0	0	0	1	0	0	0	0	0	0	0	0	1	1	0	1	1	0	0	0	1	0	0	1	0	1	0	0	0	0	0	0	0
G047p	7	0	0	0	0	0	0	0	0	0	0	0	0	0	0	0	0	0	0	0	0	0	0	0	0	0	0	0	0	0	0	0	0	0	0	0	0	0	0	0	0	0	0	0	0	0	0	0	0
G049p	7	0	0	0	1	0	0	0	0	0	0	0	0	0	0	0	0	0	1	0	1	0	0	0	0	0	0	0	0	0	0	0	0	0	0	0	0	0	0	0	0	0	0	0	0	0	0	0	0
G3X16-2	8	0	0	0	0	0	0	0	0	0	0	0	0	0	0	0	0	0	1	0	1	0	0	0	0	0	0	0	0	0	0	0	0	0	0	0	0	0	0	0	0	0	0	1	1	0	0	0	0
GCA_001614805.1_ASM161480v1	15	0	0	0	1	0	0	0	1	0	0	0	0	0	0	0	0	0	0	1	1	0	1	0	0	0	1	0	1	1	0	1	1	0	0	0	1	0	0	1	0	0	0	0	0	0	0	0	0
GCA_001614855.1_ASM161485v1	12	0	0	0	1	0	0	0	0	0	0	0	0	0	1	0	0	0	0	1	0	0	0	0	0	0	0	1	1	1	0	1	1	1	0	0	1	1	0	1	0	0	0	0	0	0	0	0	0
GCA_001614875.1_ASM161487v1	20	0	0	0	1	0	0	0	0	0	0	0	0	0	0	0	0	1	0	1	0	0	0	0	0	0	0	0	1	1	1	1	1	1	1	0	1	1	1	1	0	0	0	0	0	0	0	0	0
GCA_001614955.1_ASM161495v1	16	0	0	0	1	0	0	0	1	0	0	0	0	0	1	0	0	0	0	0	0	0	0	0	0	0	0	0	1	1	1	1	1	0	1	0	1	1	0	1	0	0	0	0	0	0	0	0	0
GCA_001614965.1_ASM161496v1	13	0	0	0	0	0	0	0	0	0	0	0	0	0	0	0	0	0	0	1	0	0	0	0	0	0	0	1	1	1	1	1	1	1	1	0	1	1	1	1	0	0	0	0	0	0	0	0	0
GCA_001615015.1_ASM161501v1	20	1	1	0	1	0	0	0	1	0	0	0	0	0	1	0	0	1	0	1	0	0	0	0	0	0	0	0	1	1	1	1	1	1	1	0	1	1	1	1	0	0	0	0	0	1	1	0	0
GCA_001615065.1_ASM161506v1	20	1	1	0	1	0	0	0	1	0	0	0	0	0	1	0	0	1	0	1	0	0	0	0	0	0	0	0	1	1	1	1	1	1	1	0	1	1	1	1	0	0	0	0	0	1	1	0	0
GCA_001615145.1_ASM161514v1	12	0	0	0	1	0	0	0	0	0	0	0	0	0	0	0	0	0	0	0	0	0	0	0	0	0	0	0	1	1	1	1	1	1	1	0	1	1	0	1	0	0	0	0	0	0	0	0	0
GCA_001615275.1_ASM161527v1	7	0	0	0	0	0	0	0	0	0	0	0	0	0	0	0	0	0	0	1	0	0	0	0	0	0	0	0	0	0	1	0	0	1	1	0	1	1	1	0	0	0	0	0	0	0	0	0	0
GCA_001615305.1_ASM161530v1	16	0	0	0	1	0	0	0	0	0	0	0	0	0	0	0	0	0	0	1	0	0	0	0	0	0	0	1	1	1	1	1	1	1	1	0	1	1	1	1	0	0	0	0	0	1	1	0	0
GCA_001615355.1_ASM161535v1	4	0	0	0	1	0	0	0	0	0	0	0	0	0	1	0	0	0	0	0	0	0	0	0	0	0	0	0	0	0	0	0	0	0	0	0	0	0	0	0	0	0	0	0	0	1	1	0	0
GCA_001615395.1_ASM161539v1	3	0	0	0	1	0	0	0	1	0	0	0	0	0	0	0	0	0	0	1	0	0	0	0	0	0	0	0	0	0	0	0	0	0	0	0	0	0	0	0	0	0	0	0	0	0	0	0	0
GCA_001615405.1_ASM161540v1	2	0	0	0	0	0	0	0	0	0	0	0	0	0	0	0	0	0	0	0	1	0	0	0	0	1	0	0	0	0	0	0	0	0	0	0	0	0	0	0	0	0	0	0	0	0	0	0	0
GCA_001615415.1_ASM161541v1	5	0	0	0	1	0	0	0	0	0	0	0	0	0	1	0	0	0	0	0	0	0	0	0	0	0	0	0	0	0	0	0	0	0	0	0	0	0	0	0	0	0	0	0	0	1	1	1	0
GCA_001615475.1_ASM161547v1	13	0	0	0	1	1	0	0	0	0	0	0	1	0	0	0	0	0	0	1	0	0	0	0	0	0	0	1	1	1	0	1	1	1	0	0	1	1	0	1	0	0	0	0	0	0	0	0	0
GCA_001615565.1_ASM161556v1	10	0	0	0	0	0	0	0	0	0	0	0	0	0	0	0	0	1	0	1	0	0	0	0	0	0	0	0	1	1	0	1	1	0	0	0	1	0	0	1	0	0	0	0	0	0	0	1	0
GCA_001615595.1_ASM161559v1	8	0	0	0	0	0	0	0	0	0	0	0	0	0	0	0	0	0	1	1	1	0	0	0	0	0	0	0	0	0	0	0	0	0	0	0	0	0	0	0	0	0	0	0	0	0	0	0	0
GCA_001615625.1_ASM161562v1	15	0	0	0	0	0	0	0	0	0	0	0	0	0	0	0	0	0	0	1	1	0	1	0	0	0	1	1	1	1	1	1	1	1	1	0	1	1	0	1	0	0	0	0	0	0	0	0	0
GCA_001615675.1_ASM161567v1	17	0	0	0	0	0	0	0	0	0	0	0	0	0	0	0	0	0	0	1	0	0	0	0	0	0	0	1	1	1	1	1	1	1	1	0	1	1	1	1	0	0	0	0	0	0	0	0	0
GCA_001615695.1_ASM161569v1	6	0	0	0	0	0	0	0	0	0	0	0	0	0	0	0	0	0	0	0	0	0	0	0	0	0	0	0	1	1	0	1	1	0	0	0	1	0	0	1	0	0	0	0	0	0	0	0	0
GCA_001615705.1_ASM161570v1	11	0	0	0	0	0	0	0	0	0	0	0	0	0	0	0	0	0	1	0	1	0	0	0	0	0	0	0	1	1	0	1	1	0	0	0	1	0	0	1	0	0	0	0	0	0	0	0	0
GCA_001615735.1_ASM161573v1	1	0	0	0	0	0	0	0	0	0	0	0	0	0	0	0	0	0	0	0	1	0	0	0	0	0	0	0	0	0	0	0	0	0	0	0	0	0	0	0	0	0	0	0	0	0	0	0	0
GCA_001615745.1_ASM161574v1	1	0	0	0	0	0	0	0	0	0	0	0	0	0	0	0	0	0	0	1	0	0	0	0	0	0	0	0	0	0	0	0	0	0	0	0	0	0	0	0	0	0	0	0	0	0	0	0	0
GCA_001615855.1_ASM161585v1	13	0	0	0	0	0	0	0	0	0	0	0	0	0	0	0	0	0	0	1	0	0	0	0	0	0	0	1	1	1	1	1	1	1	1	0	1	1	1	1	0	0	0	0	0	0	0	0	0
GCA_001615865.1_ASM161586v1	15	0	0	0	0	0	0	0	0	0	0	0	0	0	0	0	0	0	0	1	0	0	0	0	0	0	0	1	1	1	0	1	1	0	0	0	1	0	0	1	0	0	0	0	0	0	0	0	0
GCA_001615895.1_ASM161589v1	14	0	0	0	0	0	0	0	0	0	0	0	0	0	0	0	0	1	0	1	0	0	0	0	0	0	0	0	1	1	1	1	1	0	1	0	1	0	0	1	0	0	0	0	0	0	0	0	0
GCA_001615915.1_ASM161591v1	5	0	0	0	0	0	0	0	0	0	0	0	0	0	0	0	0	0	0	0	1	0	0	0	0	0	0	0	0	0	0	0	0	0	0	0	0	0	0	0	0	0	0	0	0	0	0	0	0
GCA_001615925.1_ASM161592v1	21	0	0	0	1	0	0	0	0	0	0	0	0	0	1	0	0	0	0	1	0	0	0	0	0	0	0	1	1	1	1	1	1	1	1	0	1	1	1	1	0	0	0	1	1	0	0	0	0
GCA_001615955.1_ASM161595v1	16	0	0	0	0	0	0	0	0	0	0	0	0	0	0	0	0	0	0	1	0	0	0	0	0	0	0	1	1	1	1	1	1	1	1	0	1	1	1	1	0	0	0	0	0	0	0	0	0
GCA_001615975.1_ASM161597v1	13	0	0	0	0	0	0	0	0	0	0	0	0	0	0	0	0	0	1	1	1	0	0	0	0	0	0	1	1	1	0	1	1	0	0	0	1	0	0	1	0	0	0	0	0	0	0	0	0
GCA_001615985.1_ASM161598v1	10	0	0	0	0	0	0	0	0	0	0	0	0	0	0	0	0	1	0	0	1	0	0	0	0	0	0	0	0	0	1	0	1	1	1	0	1	1	1	0	0	0	0	0	0	0	0	1	0
GCA_001616015.1_ASM161601v1	13	0	0	0	0	0	0	0	0	0	0	0	0	0	0	0	0	0	0	1	0	0	0	0	0	0	0	0	1	1	1	1	1	1	1	0	1	1	0	1	0	0	0	0	0	1	1	0	0
GCA_001616055.1_ASM161605v1	8	0	0	0	0	0	0	0	0	0	0	0	0	0	0	0	0	0	1	1	1	0	0	0	0	0	0	0	0	0	0	0	0	0	0	0	0	0	0	0	0	0	0	0	0	0	0	0	0
GCA_001616105.1_ASM161610v1	14	0	0	0	0	0	0	0	0	0	0	0	0	0	0	0	0	0	0	0	0	1	0	1	1	0	0	0	1	1	1	1	1	0	1	0	1	1	0	1	0	0	0	0	0	0	0	1	0
GCA_001616135.1_ASM161613v1	13	0	0	0	0	0	0	0	0	0	0	0	0	0	0	0	0	0	0	0	1	0	0	0	0	1	0	0	1	1	1	1	1	1	1	0	1	1	0	1	0	0	0	0	0	0	0	0	0
GCA_001616255.1_ASM161625v1	12	0	0	0	0	0	0	0	0	0	0	0	0	0	0	0	0	0	0	0	0	0	0	0	0	0	0	0	1	1	0	1	1	0	0	0	1	0	0	1	0	0	0	0	0	0	0	0	0
GCA_001616275.1_ASM161627v1	20	0	0	0	1	0	0	0	0	0	0	0	0	0	0	0	0	0	0	1	0	0	0	0	0	0	0	1	1	1	1	1	1	1	1	0	1	1	1	1	0	0	0	0	0	1	1	0	0
GCA_001616285.1_ASM161628v1	7	0	0	0	0	0	0	0	0	0	0	0	0	0	0	0	0	0	0	1	0	0	0	0	0	0	0	0	1	1	0	1	1	0	0	0	1	0	0	1	0	0	0	0	0	0	0	0	0
GCA_001616385.1_ASM161638v1	14	0	0	0	1	0	0	0	0	0	0	0	0	0	0	0	0	0	0	1	0	0	0	0	0	0	0	1	1	1	1	1	1	1	1	0	1	1	1	1	0	0	0	0	0	0	0	0	0
GCA_001616415.1_ASM161641v1	17	0	0	0	1	0	0	0	0	0	0	0	0	0	1	0	0	0	0	0	0	0	0	0	0	0	0	0	1	1	1	1	1	1	1	0	1	1	1	1	0	0	0	0	0	1	1	1	0
GCA_002196825.1_ASM219682v1	11	0	0	0	0	0	0	0	0	0	0	0	0	0	0	0	0	0	0	0	0	0	0	0	0	0	0	0	1	1	1	1	1	0	1	0	1	1	0	1	0	0	0	1	1	0	0	0	0
GCA_002230775.1_ASM223077v1	19	0	0	1	1	1	0	0	0	0	0	0	1	0	0	0	0	0	0	1	0	0	0	0	0	0	0	1	1	1	1	1	1	1	1	0	1	1	1	1	0	0	0	0	0	0	0	1	1
GCA_002464515.1_ASM246451v1	11	0	0	0	0	0	0	0	0	0	0	0	0	0	0	0	0	0	0	0	0	0	0	0	0	0	0	0	1	1	0	1	1	0	0	0	1	0	0	1	0	0	0	0	0	0	0	0	0
GCA_002464525.1_ASM246452v1	7	0	0	0	0	0	0	0	0	0	0	0	0	0	0	0	0	0	0	1	0	0	0	0	0	0	0	0	1	1	0	1	1	0	0	0	1	0	0	1	0	0	0	0	0	0	0	0	0
GCA_002464535.1_ASM246453v1	0	0	0	0	0	0	0	0	0	0	0	0	0	0	0	0	0	0	0	0	0	0	0	0	0	0	0	0	0	0	0	0	0	0	0	0	0	0	0	0	0	0	0	0	0	0	0	0	0
GCA_002464575.1_ASM246457v1	1	0	0	0	0	0	0	0	0	0	0	0	0	0	0	0	0	0	0	0	0	0	0	0	0	0	0	0	0	0	0	0	0	0	0	0	0	0	0	0	0	0	0	0	0	0	0	0	0
GCA_002464595.1_ASM246459v1	7	0	0	0	0	0	0	0	0	0	0	0	0	0	0	0	0	0	0	0	0	0	0	0	0	0	0	0	0	0	0	0	0	0	0	0	0	0	0	0	0	0	0	1	1	0	0	0	0
GCA_002464605.1_ASM246460v1	6	0	0	0	0	0	0	0	0	0	0	0	1	0	0	0	0	0	0	0	0	0	0	0	0	0	0	0	0	0	0	0	0	0	0	0	0	0	0	0	0	0	0	0	0	0	0	0	0
GDA49	13	0	0	0	0	0	0	0	0	0	0	0	0	0	0	0	0	0	1	0	1	0	0	0	0	0	0	0	1	1	0	1	1	0	0	0	1	0	0	1	0	0	0	0	0	0	0	0	0
GDA77	11	0	0	0	0	0	0	0	0	0	0	0	1	0	0	0	0	1	0	0	0	0	0	0	0	0	0	0	1	1	1	1	1	0	1	0	1	0	0	1	0	0	0	0	0	0	0	0	0
GDA88	18	0	0	0	0	0	0	0	0	0	0	0	0	0	0	0	0	0	0	1	0	0	0	0	0	0	0	1	1	1	0	1	1	0	0	0	1	0	0	1	0	0	0	0	0	0	0	0	0
GDF15	15	0	0	0	0	0	0	0	0	0	0	0	0	0	0	0	0	0	0	0	0	0	0	0	0	0	0	0	1	1	1	1	1	1	1	0	1	1	1	1	0	0	0	0	0	0	0	0	0
GDF52	14	0	0	0	0	0	0	0	0	0	0	0	0	0	0	0	0	1	0	1	0	0	0	0	0	0	0	0	1	1	1	1	1	1	1	0	1	1	1	1	0	0	0	0	0	0	0	1	0
GDF53	1	0	0	0	0	0	0	0	0	0	0	0	0	0	0	0	0	0	0	0	0	0	0	0	0	0	0	0	0	0	0	0	0	0	0	0	0	0	0	0	0	0	0	0	0	0	0	0	0
GDF61	10	0	0	0	0	0	0	0	0	0	0	0	1	0	0	0	0	0	0	1	0	0	1	0	0	0	1	0	1	1	0	1	1	0	0	0	1	0	0	1	0	0	0	0	0	0	0	0	0
GDS160	0	0	0	0	0	0	0	0	0	0	0	0	0	0	0	0	0	0	0	0	0	0	0	0	0	0	0	0	0	0	0	0	0	0	0	0	0	0	0	0	0	0	0	0	0	0	0	0	0
GDX124	2	0	0	0	0	0	0	0	0	0	0	0	0	0	0	0	0	0	0	0	0	0	0	0	0	0	0	0	0	0	0	0	0	0	0	0	0	0	0	0	0	1	0	0	0	0	0	0	0
GDX134	2	0	0	0	0	0	0	0	0	0	0	0	0	0	0	0	0	0	0	0	0	0	0	0	0	0	0	0	0	0	0	0	0	0	0	0	0	0	0	0	0	1	0	0	0	0	0	0	0
GZC08-1	21	0	0	0	1	1	0	0	0	0	0	0	1	0	1	0	0	0	0	1	0	0	0	0	0	0	0	1	1	1	1	1	1	1	1	0	1	1	1	1	0	0	0	0	0	0	0	0	0
GZC08-10	14	0	0	0	0	0	0	0	0	0	0	0	0	0	0	0	0	0	0	1	0	0	0	0	0	0	0	0	1	1	1	1	1	0	1	0	1	1	0	1	0	1	0	0	0	1	1	0	0
GZC08-12	14	0	0	0	0	0	0	0	0	0	0	0	0	0	0	0	0	0	0	1	0	0	0	0	0	0	0	0	1	1	1	1	1	0	1	0	1	1	0	1	0	1	0	0	0	1	1	0	0
GZC08-14	14	0	0	0	0	0	0	0	0	0	0	0	0	0	0	0	0	0	0	1	0	0	0	0	0	0	0	0	1	1	1	1	1	0	1	0	1	1	0	1	0	1	0	0	0	1	1	0	0
GZC08-16	10	0	0	0	0	0	0	0	0	0	0	0	1	0	0	0	0	0	0	1	0	0	0	0	0	0	0	0	1	1	0	1	1	0	0	0	1	0	0	1	0	0	0	0	0	1	1	0	0
GZC08-18	1	0	0	0	0	0	0	0	0	0	0	0	0	0	0	0	0	0	0	0	0	0	0	0	0	0	0	0	0	0	0	0	0	0	0	0	0	0	0	0	0	0	0	0	0	0	0	0	0
GZC08-2	6	0	0	0	0	0	0	0	0	0	0	0	0	0	0	0	0	0	0	0	1	0	0	0	0	0	0	0	0	0	0	0	0	0	0	0	0	0	0	0	0	0	0	0	0	0	0	0	0
GZC08-20	2	0	0	0	0	0	0	0	0	0	0	0	0	0	0	0	0	0	0	0	0	0	0	0	0	0	0	0	0	0	0	0	0	0	0	0	0	0	0	0	0	1	0	0	0	0	0	0	0
GZC08-4	1	0	0	0	0	0	0	0	0	0	0	0	0	0	0	0	0	0	0	0	0	0	0	0	0	0	0	0	0	0	0	0	0	0	0	0	0	0	0	0	0	0	0	0	0	0	0	0	0
GZC08-6	5	0	0	0	0	0	0	0	0	0	0	0	0	0	0	0	0	0	0	0	0	0	1	0	0	0	1	0	0	0	0	0	0	0	0	0	0	0	0	0	0	1	0	0	0	0	0	0	0
GZC08-8	10	0	0	0	0	0	0	0	0	0	0	0	0	0	0	0	0	0	0	1	1	0	0	0	0	0	0	1	1	1	0	1	1	0	0	0	1	0	0	1	0	0	0	0	0	0	0	0	0
GZC09-11	11	0	0	0	0	0	0	0	0	0	0	0	0	0	0	0	0	0	0	1	0	0	1	0	0	0	1	0	1	1	0	1	1	0	0	0	1	0	0	1	0	0	0	0	0	1	1	0	0
GZC09-12	14	0	0	0	0	0	0	0	0	0	0	0	0	0	0	0	1	0	0	1	0	0	0	0	0	0	0	1	1	1	0	1	1	0	0	0	1	0	0	1	0	0	0	0	0	0	0	1	0
GZC09-13	10	1	1	0	0	0	0	0	0	0	0	0	0	0	0	0	0	1	0	1	0	0	0	0	0	0	0	0	0	0	0	0	0	0	0	0	0	0	0	0	0	0	0	1	1	0	0	0	0
GZC09-14	14	0	0	0	0	0	0	0	0	0	0	0	0	0	0	0	1	0	0	1	0	0	0	0	0	0	0	1	1	1	0	1	1	0	0	0	1	0	0	1	0	0	0	0	0	0	0	1	0
GZC09-15	14	0	0	0	0	0	0	0	0	0	0	0	0	0	0	0	1	0	0	1	0	0	0	0	0	0	0	1	1	1	0	1	1	0	0	0	1	0	0	1	0	0	0	0	0	0	0	1	0
GZC09-18	13	0	0	0	0	0	0	0	0	0	0	0	0	0	0	0	0	0	0	1	0	0	0	0	0	0	0	1	1	1	1	1	1	1	1	0	1	1	1	1	0	0	0	0	0	0	0	0	0
GZC09-2	1	0	0	0	0	0	0	0	0	0	0	0	0	0	0	0	0	0	0	0	0	0	0	0	0	0	0	0	0	0	0	0	0	0	0	0	0	0	0	0	0	0	0	0	0	0	0	0	0
GZC09-25	9	0	0	0	0	0	0	0	0	0	0	0	0	0	0	0	0	0	0	1	0	0	0	0	0	0	0	0	1	1	0	1	1	0	0	0	1	0	0	1	0	0	0	0	0	0	0	0	0
GZC09-4	0	0	0	0	0	0	0	0	0	0	0	0	0	0	0	0	0	0	0	0	0	0	0	0	0	0	0	0	0	0	0	0	0	0	0	0	0	0	0	0	0	0	0	0	0	0	0	0	0
GZC09-6	11	0	0	0	1	0	0	0	0	0	0	0	0	0	0	0	0	1	0	1	0	0	0	0	0	0	0	0	1	1	1	1	1	0	1	0	1	0	0	1	0	0	0	0	0	0	0	0	0
GZC10-10	9	0	0	0	0	0	0	0	0	0	0	0	0	0	0	0	0	0	0	0	0	0	0	0	0	0	0	0	0	0	0	0	0	0	0	0	0	0	0	0	0	0	0	1	1	1	1	0	0
GZC10-12	17	0	0	0	1	0	0	0	0	0	0	0	0	0	0	0	0	0	0	1	0	0	0	0	0	0	0	1	1	1	1	1	1	1	1	0	1	1	1	1	0	0	0	0	0	1	1	1	0
GZC10-13	16	0	0	0	1	1	0	0	0	0	0	0	1	0	1	0	0	0	0	1	0	0	0	0	0	0	0	0	1	1	1	1	1	0	1	0	1	0	0	1	0	0	0	1	1	0	0	1	0
GZC10-14	21	0	0	0	1	0	0	0	0	0	0	0	0	0	0	0	0	0	0	1	0	0	0	0	0	0	0	1	1	1	1	1	1	1	1	0	1	1	1	1	0	0	0	0	0	1	1	0	0
GZC10-17	17	0	0	0	1	0	0	0	0	0	0	0	0	0	0	0	0	0	0	1	0	0	0	0	0	0	0	1	1	1	1	1	1	1	1	0	1	1	1	1	0	0	0	0	0	1	1	1	0
GZC10-4	11	0	0	0	0	0	0	0	0	0	0	0	0	0	0	0	0	0	0	1	0	0	0	0	0	0	0	0	1	1	0	1	1	0	0	0	1	0	0	1	0	1	0	1	1	0	0	0	0
GZC10-6	10	0	0	0	0	0	0	0	0	0	0	0	0	0	0	0	0	0	0	1	0	0	1	0	0	0	1	0	1	1	0	1	1	0	0	0	1	0	0	1	0	0	0	0	0	0	0	1	0
GZC10-8	11	0	0	0	0	0	0	0	0	0	0	0	0	0	0	0	0	0	0	1	0	0	0	0	0	0	0	0	1	1	0	1	1	0	0	0	1	0	0	1	0	1	0	1	1	0	0	0	0
GZC11-1	17	0	0	0	0	0	0	0	0	0	0	0	0	0	0	0	0	0	0	1	0	0	0	0	0	0	0	0	1	1	1	1	1	1	1	0	1	1	0	1	0	0	0	1	1	0	0	0	0
GZC11-5	17	0	0	0	0	0	0	0	0	0	0	0	0	0	0	0	0	0	0	1	0	0	0	0	0	0	0	0	1	1	1	1	1	1	1	0	1	1	0	1	0	0	0	1	1	0	0	0	0
GZC11-6	13	0	0	0	0	1	0	0	0	0	0	0	1	0	0	0	0	1	0	1	0	0	0	0	0	0	0	0	1	1	0	1	1	0	0	0	1	0	0	1	0	0	0	1	1	0	0	1	0
GZC12-1	8	0	0	0	0	0	0	0	0	0	0	0	0	0	0	0	0	0	0	1	1	0	0	0	0	0	0	0	0	0	0	0	0	0	0	0	0	0	0	0	0	1	0	0	0	0	0	0	0
GZC12-13	15	0	0	1	1	1	0	0	0	0	0	0	0	0	0	0	0	0	0	0	0	0	0	0	0	0	0	0	1	1	0	1	1	0	0	0	1	0	0	1	0	0	0	1	1	0	0	1	1
GZC12-18	12	0	0	0	0	0	0	0	0	0	0	0	0	0	0	0	0	0	0	1	0	0	0	0	0	0	0	0	1	1	1	1	1	0	1	0	1	0	1	1	0	0	0	0	0	0	0	1	0
GZC12-20	19	1	1	0	0	0	0	0	0	0	0	0	0	0	0	0	0	1	0	1	0	0	0	0	0	0	0	1	1	0	1	0	1	1	1	0	1	1	1	0	0	1	0	0	0	0	0	0	0
GZC13-14	13	0	0	0	0	0	0	0	0	0	0	0	0	0	0	0	0	0	0	1	0	0	0	0	0	0	0	1	1	1	1	1	1	1	1	0	1	1	1	1	0	0	0	0	0	0	0	0	0
GZC13-24	7	0	0	0	0	0	0	0	0	0	0	0	0	0	0	0	0	0	0	0	0	0	0	0	0	0	0	0	0	0	0	0	0	0	0	0	0	0	0	0	0	0	0	0	0	1	1	0	0
GZC13-7	17	0	0	0	1	0	0	0	0	0	0	0	1	0	0	0	0	1	0	1	0	0	0	0	0	0	0	1	1	1	1	1	1	1	1	0	1	1	1	1	0	0	0	0	0	0	0	0	0
GZP08-8	11	0	0	0	0	0	0	0	0	0	0	0	1	0	0	0	0	0	0	0	0	0	0	0	0	0	0	0	1	1	0	1	1	0	0	0	1	0	0	1	0	0	0	0	0	1	1	1	0
GZP08-9	11	0	0	0	0	0	0	0	0	0	0	0	1	0	0	0	0	0	0	0	0	0	0	0	0	0	0	0	1	1	0	1	1	0	0	0	1	0	0	1	0	0	0	0	0	1	1	1	0
GZP09-19	3	0	0	0	1	0	0	0	0	0	0	0	1	0	0	0	0	0	0	0	0	0	0	0	0	0	0	0	0	0	0	0	0	0	0	0	0	0	0	0	0	0	0	0	0	0	0	1	0
GZP09-22	7	0	0	0	0	0	0	0	0	0	0	0	1	0	0	0	0	0	0	0	0	0	0	0	0	0	0	0	0	0	0	0	0	0	0	0	0	0	0	0	0	0	0	0	0	0	0	1	0
GZP09-23	1	0	0	0	0	0	0	0	0	0	0	0	0	0	0	0	0	0	0	0	1	0	0	0	0	0	0	0	0	0	0	0	0	0	0	0	0	0	0	0	0	0	0	0	0	0	0	0	0
GZP10-10	16	0	0	0	1	1	0	0	0	0	0	0	1	0	1	0	0	0	0	1	0	0	0	0	0	0	0	0	1	1	1	1	1	0	1	0	1	0	0	1	0	0	0	1	1	0	0	1	0
GZP10-11	14	0	0	0	1	0	0	0	0	0	0	0	1	0	0	0	0	0	0	1	0	0	0	0	0	0	0	0	1	1	1	1	1	0	1	0	1	0	0	1	0	0	0	1	1	0	0	1	0
GZP10-13	15	0	0	0	1	1	0	0	0	0	0	0	0	0	1	0	0	0	0	1	0	0	0	0	0	0	0	0	1	1	1	1	1	0	1	0	1	0	0	1	0	0	0	1	1	0	0	1	0
GZP10-8	15	0	0	0	1	1	0	0	0	0	0	0	0	0	1	0	0	0	0	1	0	0	0	0	0	0	0	0	1	1	1	1	1	0	1	0	1	0	0	1	0	0	0	1	1	0	0	1	0
GZP11-11	16	0	0	0	0	0	0	0	0	0	0	0	0	0	0	0	0	0	1	1	1	0	0	0	0	0	0	1	1	1	1	1	1	0	1	0	1	0	0	1	0	0	0	0	0	0	0	1	0
GZP11-15	4	0	0	0	0	0	0	0	0	0	0	0	0	0	0	0	0	0	1	0	1	0	0	0	0	0	0	0	0	0	0	0	0	0	0	0	0	0	0	0	0	0	0	0	0	0	0	0	0
GZP11-18	13	0	0	0	1	0	0	1	0	0	0	0	1	0	0	0	0	0	0	1	0	0	0	0	0	0	0	1	1	1	0	1	1	0	0	0	1	0	0	1	0	0	0	0	0	0	0	1	0
GZP11-5	2	0	0	0	0	0	0	0	0	0	0	0	0	0	0	0	0	0	0	0	0	0	0	0	0	0	0	0	0	0	0	0	0	0	0	0	0	0	0	0	0	0	0	0	0	0	0	0	0
GZP11-6	14	0	0	0	0	0	0	0	0	0	0	0	0	0	0	0	0	0	0	1	0	0	0	0	0	0	0	1	1	1	0	1	1	0	0	0	1	0	0	1	0	0	0	1	1	0	0	0	0
GZP11-9	25	0	0	0	1	0	0	1	0	0	0	0	1	0	0	0	0	0	1	1	1	0	0	0	0	0	0	1	1	1	1	1	1	0	1	0	1	0	0	1	0	0	0	0	0	1	1	1	0
GZP12-13	12	0	0	0	1	0	0	1	0	0	0	0	0	0	0	0	0	0	1	0	1	0	0	0	0	0	0	0	0	0	0	0	0	0	0	0	0	0	0	0	0	0	0	0	0	0	0	0	0
GZP13-1	13	0	0	0	0	1	0	0	0	0	0	0	1	0	0	0	0	1	0	1	0	0	0	0	0	0	0	0	1	1	0	1	1	0	0	0	1	0	0	1	0	0	0	1	1	0	0	1	0
GZP13-4	19	0	0	0	0	0	0	1	0	0	0	0	1	0	0	0	0	0	0	1	0	0	0	0	0	0	0	1	1	1	1	1	1	1	1	0	1	1	1	1	0	0	0	0	0	1	1	0	0
GZP13-6	5	0	0	0	1	0	0	0	0	0	0	0	1	0	0	0	0	0	0	0	0	0	0	0	0	0	0	0	0	0	0	0	0	0	0	0	0	0	0	0	0	0	0	0	0	0	0	1	0
H001p	5	0	0	0	0	0	0	0	0	0	0	0	1	0	0	0	0	0	0	0	0	0	0	0	0	1	0	0	0	0	0	0	0	0	0	0	0	0	0	0	0	0	0	0	0	0	0	0	0
H022p	9	0	0	0	0	0	0	1	0	0	0	0	0	0	0	0	0	0	0	0	0	0	0	0	0	1	0	0	0	0	0	0	0	0	0	0	0	0	0	0	0	0	0	0	0	0	0	0	0
H058p	13	0	0	1	0	0	0	0	0	0	0	0	0	0	0	0	0	0	0	1	0	0	0	0	0	0	0	1	1	1	0	1	1	0	0	0	1	0	0	1	0	0	0	0	0	0	0	0	1
HB-Coli0	18	0	0	0	0	0	0	0	0	0	0	0	0	0	0	0	0	0	0	1	0	0	0	0	0	0	0	1	1	1	1	1	1	1	1	0	1	1	1	1	0	0	0	0	0	0	0	0	0
HDC9	2	0	0	0	0	0	0	0	0	0	0	0	0	0	0	0	0	0	0	0	0	0	0	0	0	0	0	0	0	0	0	0	0	0	0	0	0	0	0	0	0	0	0	1	1	0	0	0	0
HGS1	10	0	0	0	0	0	0	0	0	0	0	0	0	0	0	0	0	0	0	1	0	0	0	0	0	0	0	0	1	1	0	1	1	0	0	0	1	0	0	1	0	0	0	0	0	0	0	0	0
HNK130	3	1	1	0	0	0	0	0	0	0	0	0	0	0	0	0	0	0	0	0	0	0	0	0	0	0	0	0	0	0	0	0	0	0	0	0	0	0	0	0	0	0	0	0	0	0	0	0	0
HPC12	2	0	0	0	0	0	0	0	0	0	0	0	0	0	0	0	0	0	0	0	1	0	0	0	0	0	0	0	0	0	0	0	0	0	0	0	0	0	0	0	0	0	0	0	0	0	0	0	0
HSC21	8	0	0	0	0	0	0	0	0	0	0	0	0	0	0	0	0	0	0	1	0	0	0	0	0	0	0	0	1	1	0	1	1	0	0	0	1	0	0	1	0	0	0	0	0	0	0	0	0
I003p	18	0	0	0	0	0	0	0	0	0	0	0	1	0	0	0	0	0	0	0	0	0	0	0	0	0	0	0	0	0	0	0	0	0	0	0	0	0	0	0	0	0	0	1	1	0	0	0	0
I025f	7	0	0	0	0	1	0	0	0	0	0	0	0	0	0	0	0	0	0	0	0	0	0	0	0	0	0	0	0	0	0	0	0	0	0	0	0	0	0	0	0	0	0	1	1	0	0	0	0
I027ch	6	0	0	0	0	0	0	0	0	0	0	0	0	0	0	0	0	0	0	0	1	0	0	0	0	0	0	0	0	0	0	0	0	0	0	0	0	0	0	0	0	1	0	0	0	0	0	0	0
J034p	13	0	0	0	0	0	0	0	0	0	0	0	0	0	0	0	0	0	0	0	0	0	0	0	0	0	0	0	0	0	1	0	1	1	1	0	1	1	1	0	0	0	0	1	1	0	0	0	0
J037ch	19	0	0	0	0	0	0	0	0	0	0	0	1	0	0	0	0	0	0	1	0	0	0	0	0	0	0	1	1	1	1	1	1	1	1	0	1	1	1	1	0	0	0	0	0	0	0	0	0
J041p	6	0	0	0	0	0	0	0	0	0	0	0	1	0	0	0	0	0	0	0	1	0	0	0	0	0	0	0	0	0	0	0	0	0	0	0	0	0	0	0	0	0	0	0	0	0	0	0	0
JNBX	9	0	0	0	0	0	0	0	0	0	0	0	0	0	0	0	0	0	0	1	0	0	0	0	0	0	0	1	1	1	0	1	1	0	0	0	1	0	0	1	0	0	0	0	0	0	0	0	0
JX1	12	0	0	0	0	0	0	0	0	0	0	0	0	0	0	0	0	0	0	1	0	0	0	0	0	0	0	0	1	1	0	1	1	0	0	0	1	0	0	1	0	1	0	0	0	1	1	0	0
JX3	9	0	0	0	0	0	0	0	0	0	0	0	0	0	0	0	0	0	0	1	0	0	0	0	0	0	0	0	1	1	0	1	1	0	0	0	1	0	0	1	0	1	0	0	0	0	0	0	0
JX4	11	0	0	0	0	0	0	0	0	0	0	0	1	0	0	0	0	0	0	1	0	0	0	0	0	0	0	0	1	1	0	1	1	0	0	0	1	0	0	1	0	1	0	0	0	0	0	0	0
JX5	11	0	0	0	0	0	0	0	0	0	0	0	1	0	0	0	0	0	0	1	0	0	0	0	0	0	0	0	1	1	0	1	1	0	0	0	1	0	0	1	0	1	0	0	0	0	0	0	0
JX6	14	0	0	1	1	0	0	0	0	0	0	0	0	0	0	0	0	0	0	1	0	0	0	0	0	0	0	0	1	1	1	1	1	0	1	0	1	1	0	1	0	0	0	0	0	0	0	0	1
JX7	14	0	0	1	1	0	0	0	0	0	0	0	0	0	0	0	0	0	0	1	0	0	0	0	0	0	0	0	1	1	1	1	1	0	1	0	1	1	0	1	0	0	0	0	0	0	0	0	1
JX9	14	0	0	1	1	0	0	0	0	0	0	0	0	0	0	0	0	0	0	1	0	0	0	0	0	0	0	0	1	1	1	1	1	0	1	0	1	1	0	1	0	0	0	0	0	0	0	0	1
KR2009	0	0	0	0	0	0	0	0	0	0	0	0	0	0	0	0	0	0	0	0	0	0	0	0	0	0	0	0	0	0	0	0	0	0	0	0	0	0	0	0	0	0	0	0	0	0	0	0	0
L001p	15	0	0	0	0	0	0	0	0	0	0	0	1	0	0	0	0	0	0	0	0	0	0	0	0	0	0	0	1	1	0	1	1	0	0	0	1	0	0	1	0	0	0	0	0	0	0	0	0
L020p	7	0	0	0	0	0	0	0	0	0	0	0	1	0	0	0	0	0	0	0	1	0	0	0	0	0	0	0	0	0	0	0	0	0	0	0	0	0	0	0	0	0	0	0	0	1	1	0	0
L057p	7	0	0	0	0	0	0	0	0	0	0	0	0	0	0	0	0	0	0	0	0	0	0	0	0	0	0	0	0	0	0	0	0	0	0	0	0	0	0	0	0	0	0	0	0	0	0	0	0
LBBM	12	0	0	0	0	0	0	0	0	0	0	0	0	0	0	0	0	0	0	0	0	0	0	0	0	0	0	0	1	1	0	1	1	0	0	0	1	0	0	1	0	0	0	1	1	0	0	0	0
LBBN	15	0	0	0	0	0	0	0	0	0	0	0	0	0	0	0	0	0	0	1	0	0	0	0	0	0	0	1	1	1	1	1	1	1	1	0	1	1	0	1	0	0	0	0	0	1	1	0	0
LCD32	7	0	0	0	0	0	0	0	0	0	0	0	0	0	0	0	0	0	0	0	1	0	0	0	0	0	0	0	0	0	0	0	0	0	0	0	0	0	0	0	0	1	0	1	1	1	1	0	0
LCD33	8	0	0	0	0	0	0	0	0	0	0	0	1	0	0	0	0	0	1	1	1	0	0	0	0	0	0	0	0	0	0	0	0	0	0	0	0	0	0	0	0	0	0	0	0	1	1	1	0
LCD34	2	0	0	0	0	0	0	0	0	0	0	0	0	0	0	0	0	0	0	1	0	0	0	0	0	0	0	1	0	0	0	0	0	0	0	0	0	0	0	0	0	0	0	0	0	0	0	0	0
LFQP	14	0	0	0	0	0	0	0	0	0	0	0	0	0	0	0	0	0	1	1	1	0	0	0	0	0	0	0	1	1	0	1	1	0	0	0	1	0	0	1	1	1	1	0	0	0	0	0	0
LHM10-1	14	0	0	0	0	0	0	0	0	0	0	0	0	0	0	0	0	0	0	0	0	0	0	0	0	0	0	1	1	1	0	1	1	0	0	0	1	0	0	1	0	0	0	0	0	0	0	0	0
LJCG	14	0	0	0	0	0	0	0	0	1	0	0	0	0	0	0	0	0	0	1	0	0	0	0	0	0	0	1	1	1	1	1	1	1	1	0	1	1	1	1	0	0	0	0	0	0	0	0	0
LN100	12	0	0	0	0	0	0	0	0	0	0	0	0	0	0	0	0	0	0	1	0	0	1	0	0	0	1	0	1	1	1	1	1	0	1	0	1	1	0	1	0	0	0	0	0	0	0	0	0
LN101	14	0	0	1	0	0	0	0	0	0	0	0	0	0	0	0	0	0	0	1	0	0	1	0	0	0	1	0	1	1	1	1	1	0	1	0	1	1	0	1	0	0	0	0	0	0	0	0	1
LN105	15	0	0	0	0	0	0	0	0	0	0	0	1	0	0	0	0	0	0	1	0	0	0	0	0	0	0	1	1	0	1	0	1	1	1	0	1	1	1	0	0	1	0	0	0	0	0	0	0
LN129	11	0	0	0	0	0	0	0	0	0	0	0	1	0	0	0	0	1	0	1	0	0	0	0	0	0	0	0	0	0	1	1	0	1	1	0	0	1	1	0	0	1	0	0	0	0	0	0	0
LN130	11	0	0	0	0	0	0	0	0	0	0	0	1	0	0	0	0	1	0	1	0	0	0	0	0	0	0	0	0	0	1	1	0	1	1	0	0	1	1	0	0	1	0	0	0	0	0	0	0
LN131	10	0	0	0	0	0	0	0	0	0	0	0	0	0	0	0	0	0	0	1	0	0	0	0	0	0	0	0	1	1	0	1	1	0	0	0	1	0	0	1	0	1	0	0	0	0	0	0	0
LN132	3	0	0	0	0	0	0	0	0	0	0	0	0	0	0	0	0	0	0	0	0	0	1	0	0	0	1	0	0	0	0	0	0	0	0	0	0	0	0	0	0	0	0	0	0	0	0	0	0
LN137	4	0	0	0	0	0	0	0	0	0	0	0	0	0	0	0	0	0	1	0	1	0	0	0	0	0	0	0	0	0	0	0	0	0	0	0	0	0	0	0	0	1	0	0	0	0	0	0	0
LN140	17	0	0	0	0	0	0	0	0	0	0	0	0	0	0	0	0	0	0	1	0	0	0	0	0	0	0	1	1	1	1	1	1	1	1	0	1	1	1	1	0	0	0	0	0	0	0	0	0
LN141	5	0	0	0	0	0	0	0	0	0	0	0	0	0	0	0	0	0	0	0	0	0	0	0	0	0	0	0	0	0	0	0	0	0	0	0	0	0	0	0	0	0	0	0	0	0	0	0	0
LN142	3	0	0	0	0	0	0	0	0	0	0	0	0	0	0	0	0	0	0	0	0	0	1	0	0	0	1	0	0	0	0	0	0	0	0	0	0	0	0	0	0	0	0	0	0	0	0	0	0
LN143	9	0	0	0	0	0	0	0	0	0	0	0	0	0	0	0	0	0	0	1	0	0	0	0	0	0	0	0	1	1	0	1	1	0	0	0	1	0	0	1	0	0	0	0	0	0	0	0	0
LN144	7	0	0	0	0	0	0	0	0	0	0	0	0	0	0	0	0	0	0	1	0	0	0	0	0	0	0	0	1	1	0	1	1	0	0	0	1	0	0	1	0	0	0	0	0	0	0	0	0
LN149	12	0	0	0	0	0	0	0	0	0	0	0	1	0	0	0	0	0	0	1	0	0	0	0	0	0	0	0	1	1	0	1	1	0	0	0	1	0	0	1	0	0	0	0	0	0	0	0	0
LN150	1	0	0	0	0	0	0	0	0	0	0	0	0	0	0	0	0	0	0	0	0	0	0	0	0	0	0	0	0	0	0	0	0	0	0	0	0	0	0	0	0	0	0	0	0	0	0	0	0
LN2	18	0	0	0	0	0	0	0	0	0	0	0	1	0	0	0	0	0	0	1	0	0	0	0	0	0	0	1	1	1	1	1	1	1	1	0	1	1	1	1	0	0	0	0	0	0	0	0	0
LN36	11	0	0	0	0	0	0	0	0	0	0	0	0	0	0	0	0	0	1	0	1	0	0	0	0	0	0	0	0	0	1	0	1	1	1	0	0	1	1	0	0	1	0	0	0	0	0	0	0
LN44	20	0	0	0	0	1	0	0	0	0	0	0	1	0	0	0	0	0	0	1	0	0	0	0	0	0	0	1	1	1	1	1	1	1	1	0	1	1	1	1	0	0	0	0	0	0	0	0	0
LN62	14	0	0	0	0	0	0	0	0	0	0	0	0	0	0	0	0	1	0	1	0	0	1	0	0	0	1	0	0	0	1	1	0	1	1	0	0	1	1	0	0	0	0	0	0	0	0	0	0
LN65	7	0	0	0	0	0	0	0	0	0	0	0	0	0	0	0	0	0	0	1	0	0	0	0	0	0	0	0	1	1	0	1	1	0	0	0	1	0	0	1	0	0	0	0	0	0	0	0	0
LN67	8	0	0	0	0	1	0	0	0	0	0	0	0	0	0	0	0	0	0	1	0	0	0	0	0	0	0	0	1	1	0	1	1	0	0	0	1	0	0	1	0	0	0	0	0	0	0	0	0
LN68	14	0	0	0	0	0	0	0	0	0	0	0	0	0	0	0	0	1	0	1	0	0	1	0	0	0	1	0	0	0	1	1	0	1	1	0	0	1	1	0	0	0	0	0	0	0	0	0	0
LN81	8	0	0	0	0	0	0	0	0	0	0	0	1	0	0	0	0	0	0	1	0	0	0	0	0	0	0	0	1	1	0	1	1	0	0	0	1	0	0	1	0	0	0	0	0	0	0	0	0
LN83	16	0	0	0	0	0	0	0	0	0	0	0	0	0	0	0	0	1	0	1	0	0	1	0	0	0	1	0	0	0	1	1	0	1	1	0	0	1	1	0	0	1	0	0	0	0	0	0	0
LN84	8	0	0	0	0	0	0	0	0	0	0	0	1	0	0	0	0	0	0	1	0	0	0	0	0	0	0	0	1	1	0	1	1	0	0	0	1	0	0	1	0	0	0	0	0	0	0	0	0
LN85	8	0	0	0	0	0	0	0	0	0	0	0	1	0	0	0	0	0	0	1	0	0	0	0	0	0	0	0	1	1	0	1	1	0	0	0	1	0	0	1	0	0	0	0	0	0	0	0	0
LN86	7	0	0	0	0	0	0	0	0	0	0	0	0	0	0	0	0	0	0	1	0	0	0	0	0	0	0	0	1	1	0	1	1	0	0	0	1	0	0	1	0	0	0	0	0	0	0	0	0
LN92	2	0	0	0	0	0	0	0	0	0	0	0	0	0	0	0	0	0	0	0	0	0	0	0	0	1	0	0	0	0	0	0	0	0	0	0	0	0	0	0	0	1	0	0	0	0	0	0	0
LN94	21	0	0	0	0	0	0	0	0	0	0	0	0	0	0	0	0	0	0	1	0	0	0	0	0	0	0	1	1	1	1	1	1	1	1	0	1	1	1	1	0	0	0	0	0	0	0	0	0
LN95	6	0	0	0	0	0	0	0	0	0	0	0	0	0	0	0	0	0	0	0	0	0	0	0	0	0	0	0	1	1	0	1	1	0	0	0	1	0	0	1	0	0	0	0	0	0	0	0	0
LN97	7	0	0	0	0	0	0	0	0	0	0	0	0	0	0	0	0	0	0	1	0	0	0	0	0	0	0	0	0	0	0	0	0	0	0	0	0	0	0	0	0	1	0	1	1	0	0	0	0
LN98	15	0	0	0	0	0	0	0	0	0	0	0	1	0	0	0	0	0	0	1	0	0	0	0	0	0	0	1	1	0	1	0	1	1	1	0	1	1	1	0	0	1	0	0	0	0	0	0	0
LN99	13	0	0	0	0	0	0	0	0	0	0	0	1	0	0	0	0	0	0	1	0	0	0	0	0	0	0	1	1	0	1	0	1	1	1	0	1	1	1	0	0	1	0	0	0	0	0	0	0
LRGE	0	0	0	0	0	0	0	0	0	0	0	0	0	0	0	0	0	0	0	0	0	0	0	0	0	0	0	0	0	0	0	0	0	0	0	0	0	0	0	0	0	0	0	0	0	0	0	0	0
LVLK	18	0	0	0	0	0	0	0	0	0	0	0	0	0	0	0	0	1	0	1	0	0	0	0	0	0	0	0	1	1	1	1	1	1	1	0	1	1	1	1	0	0	0	0	0	1	1	0	0
LVLL	12	0	0	0	1	0	0	0	0	0	0	0	0	0	0	0	0	0	0	0	0	0	0	0	0	0	0	0	1	1	1	1	1	1	1	0	1	1	0	1	0	0	0	0	0	0	0	0	0
LVLM	11	0	0	0	1	0	0	0	0	0	0	0	0	0	1	0	0	0	0	1	0	0	0	0	0	0	0	0	1	1	0	1	1	1	0	0	1	1	0	1	0	0	0	0	0	0	0	0	0
LVLN	0	0	0	0	0	0	0	0	0	0	0	0	0	0	0	0	0	0	0	0	0	0	0	0	0	0	0	0	0	0	0	0	0	0	0	0	0	0	0	0	0	0	0	0	0	0	0	0	0
LVLP	1	0	0	0	0	0	0	0	0	0	0	0	1	0	0	0	0	0	0	0	0	0	0	0	0	0	0	0	0	0	0	0	0	0	0	0	0	0	0	0	0	0	0	0	0	0	0	0	0
LVLR	16	0	0	0	0	0	0	0	0	0	0	0	0	0	0	0	0	1	0	1	0	0	0	0	0	0	0	0	1	1	1	1	1	1	1	0	1	1	1	1	0	0	0	0	0	0	0	0	0
LVLT	2	0	0	0	0	0	0	0	0	0	0	0	0	0	0	0	0	0	0	0	0	0	0	0	0	0	0	0	0	0	0	0	0	0	0	0	0	0	0	0	0	0	0	0	0	1	1	0	0
LVLU	18	0	0	0	0	0	0	0	0	0	0	0	0	0	0	0	0	0	0	1	0	0	0	0	0	0	0	1	1	1	1	1	1	1	1	0	1	1	1	1	0	0	0	0	0	0	0	0	0
LVLV	17	0	0	1	0	0	0	0	0	0	0	0	0	0	0	0	0	0	0	1	0	0	0	0	0	0	0	0	1	1	1	1	1	0	1	0	1	1	0	1	0	0	0	1	1	1	1	0	1
LVLW	14	0	0	0	0	0	0	0	0	0	0	0	0	0	0	0	0	1	0	1	0	0	0	0	0	1	0	0	1	1	0	1	1	0	0	0	1	0	1	1	0	0	0	1	1	1	1	0	0
LVLX	11	0	0	0	1	0	0	0	0	0	0	0	0	0	0	0	0	0	0	1	0	0	0	0	0	0	0	0	1	1	1	1	1	0	1	0	1	1	0	1	0	0	0	0	0	0	0	0	0
LVLY	20	0	0	0	0	0	0	0	0	0	0	0	0	0	0	0	0	0	0	1	0	0	0	0	0	0	0	1	1	1	1	1	1	1	1	0	1	1	1	1	0	0	0	0	0	1	1	0	0
LVLZ	8	0	0	0	0	0	0	0	0	0	0	0	0	0	0	0	0	0	0	1	0	0	0	0	0	0	0	1	1	1	0	1	1	0	0	0	1	0	0	1	0	0	0	0	0	0	0	0	0
LVMA	11	0	0	0	0	0	0	0	0	0	0	0	0	0	0	0	0	0	0	1	0	0	0	0	0	0	0	0	1	1	1	1	1	0	1	0	1	0	0	1	0	0	0	0	0	1	1	0	0
LVMB	10	0	0	0	0	0	0	0	0	0	0	0	0	0	0	0	0	0	0	1	0	0	0	0	0	0	0	0	1	1	1	1	1	0	1	0	1	1	0	1	0	0	0	0	0	0	0	0	0
LVMC	9	0	0	1	0	0	0	0	0	0	0	0	1	0	0	0	0	1	0	0	0	0	0	0	0	0	0	0	0	0	0	0	0	0	0	0	0	0	0	0	0	0	0	1	1	0	0	0	1
LVMK	17	0	0	0	1	0	0	0	0	0	0	0	0	0	1	0	1	0	0	1	0	0	0	0	0	0	0	0	1	1	1	1	1	1	1	0	1	1	0	1	0	0	0	0	0	1	1	0	0
LVMM	2	0	0	0	1	0	0	0	0	0	0	0	0	0	1	0	0	0	0	0	0	0	0	0	0	0	0	0	0	0	0	0	0	0	0	0	0	0	0	0	0	0	0	0	0	0	0	0	0
LVMN	0	0	0	0	0	0	0	0	0	0	0	0	0	0	0	0	0	0	0	0	0	0	0	0	0	0	0	0	0	0	0	0	0	0	0	0	0	0	0	0	0	0	0	0	0	0	0	0	0
LVMO	18	0	0	0	1	0	0	0	0	0	0	0	0	0	1	0	0	0	0	1	0	0	0	0	0	0	0	1	1	1	0	1	1	1	0	0	1	1	1	1	0	0	0	0	0	0	0	0	0
LVMQ	2	0	0	0	0	0	0	0	0	0	0	0	0	0	0	0	0	0	0	0	0	0	0	0	0	1	0	0	0	0	0	0	0	0	0	0	0	0	0	0	0	0	0	0	0	0	0	0	0
LVMR	19	1	1	0	1	0	0	0	1	0	0	0	0	0	0	0	0	1	0	1	0	0	0	0	0	0	0	0	1	1	1	1	1	1	1	0	1	1	1	1	0	0	0	0	0	1	1	0	0
LVMZ	18	0	0	0	1	1	0	0	0	0	0	0	0	0	0	0	0	0	0	1	0	0	0	0	0	0	0	0	1	1	1	1	1	0	1	0	1	1	0	1	0	0	0	1	1	1	1	1	0
LVNB	11	0	0	0	1	0	0	0	1	0	0	0	1	0	0	0	0	1	0	1	0	0	0	0	0	0	0	0	0	0	1	0	0	1	1	0	1	1	1	0	0	0	0	0	0	0	0	0	0
LVNC	12	0	0	0	0	1	0	0	0	0	0	0	1	0	0	0	0	0	0	1	0	0	0	0	0	0	0	0	1	1	0	1	1	1	0	0	1	1	0	1	0	0	0	0	0	0	0	0	0
LVND	15	0	0	0	1	0	0	0	0	0	0	0	0	0	1	0	0	0	0	0	0	0	0	0	0	0	0	0	1	1	1	1	1	0	1	0	1	1	0	1	0	0	0	0	0	0	0	0	0
LVNG	9	0	0	0	1	0	0	0	0	0	0	0	0	0	0	0	0	0	0	1	0	0	0	0	0	0	0	1	1	1	0	1	1	0	0	0	1	0	0	1	0	0	0	0	0	0	0	0	0
LVNI	14	0	0	0	0	0	0	0	0	0	0	0	0	0	0	0	0	0	0	1	0	0	0	0	0	0	0	1	1	1	1	1	1	1	1	0	1	1	1	1	0	0	0	0	0	0	0	0	0
LVNO	4	0	0	0	0	0	0	0	0	0	0	0	0	0	0	0	0	0	0	0	0	0	0	0	0	0	0	0	0	0	0	0	0	0	0	0	0	0	0	0	0	0	0	0	0	0	0	0	0
LVNP	9	0	0	0	0	0	0	0	0	0	0	0	0	0	0	0	0	1	0	1	0	0	0	0	0	0	0	0	0	0	0	0	0	0	0	0	0	0	0	0	0	0	0	0	0	1	1	0	0
LVNQ	8	0	0	0	0	0	0	0	0	0	0	0	0	0	0	0	0	0	0	1	0	0	0	0	0	0	0	0	1	1	0	1	1	0	0	0	1	0	0	1	0	0	0	0	0	0	0	0	0
LVNR	19	0	0	0	0	0	0	0	0	0	0	0	0	0	0	0	0	0	1	0	0	0	0	0	0	0	0	0	1	1	1	1	1	1	1	0	1	1	0	1	1	1	1	0	0	0	0	0	0
LVOA	13	0	0	0	0	0	0	0	0	0	0	0	0	0	0	0	0	0	0	0	0	0	0	0	0	0	0	0	1	1	1	1	1	0	1	0	1	1	0	1	0	0	0	0	0	0	0	0	0
LVOD	5	0	0	0	0	0	0	0	0	0	0	0	0	0	0	0	0	0	1	0	1	0	0	0	0	0	0	0	0	0	0	0	0	0	0	0	0	0	0	0	0	0	0	0	0	0	0	0	0
LVOE	15	0	0	0	0	0	0	0	0	0	0	0	0	0	0	0	0	0	0	1	0	0	0	0	0	0	0	0	1	1	1	1	1	0	1	0	1	1	0	1	0	0	0	1	1	1	1	1	0
LVOH	17	0	0	0	0	0	0	0	0	0	0	0	0	0	0	0	0	0	0	0	0	0	0	0	0	0	0	0	1	1	1	1	1	1	1	0	1	1	1	1	0	0	0	1	1	0	0	0	0
LVOI	4	0	0	0	0	0	0	0	0	0	0	0	0	0	0	0	0	0	0	0	0	0	0	0	0	0	0	0	0	0	0	0	0	0	0	0	0	0	0	0	0	0	0	0	0	0	0	0	0
LVOJ	2	0	0	0	0	0	0	0	0	0	0	0	0	0	0	0	0	1	0	1	0	0	0	0	0	0	0	0	0	0	0	0	0	0	0	0	0	0	0	0	0	0	0	0	0	0	0	0	0
LVOK	8	0	0	0	0	0	0	0	0	0	0	0	0	0	0	0	0	0	1	1	1	0	0	0	0	0	0	0	0	0	0	0	0	0	0	0	0	0	0	0	0	0	0	0	0	0	0	0	0
LVOL	17	0	0	0	0	0	0	0	0	0	0	0	0	0	0	0	0	0	0	0	1	0	1	0	0	0	1	0	1	1	1	1	1	1	1	0	1	1	1	1	0	0	0	0	0	1	1	0	0
LVOP	2	0	0	0	0	0	0	0	0	0	0	0	0	0	0	0	0	0	0	1	0	0	0	0	0	0	0	0	0	0	0	0	0	0	0	0	0	0	0	0	0	0	0	0	0	0	0	1	0
LVOQ	6	0	0	0	0	0	0	0	0	0	0	0	0	0	0	0	0	1	0	1	0	0	0	0	0	0	0	0	0	0	0	0	0	0	0	0	0	0	0	0	0	0	0	0	0	0	0	0	0
LVOR	16	0	0	0	1	0	0	0	0	0	0	0	0	0	0	0	0	0	0	1	0	0	0	0	0	0	0	0	1	1	1	1	1	0	1	0	1	1	0	1	0	0	0	1	1	1	1	1	0
LVOS	16	0	0	0	0	0	0	0	0	0	0	0	0	0	0	0	0	0	0	0	0	0	0	0	0	0	0	0	1	1	1	1	1	1	1	0	1	1	1	1	0	0	0	1	1	0	0	0	0
LVOV	12	0	0	0	0	0	0	0	0	0	0	0	0	0	0	0	0	0	0	1	1	0	0	0	0	0	0	1	1	1	0	1	1	0	0	0	1	0	0	1	0	0	0	0	0	0	0	0	0
LVOW	13	0	0	0	0	0	0	0	0	0	0	0	0	0	0	0	0	0	1	1	0	0	0	0	0	0	0	1	1	1	0	1	1	0	0	0	1	0	0	1	0	0	0	0	0	0	0	0	0
LVOX	10	0	0	0	1	0	0	0	0	0	0	0	0	0	0	0	0	0	0	1	0	0	0	0	0	0	0	0	1	1	1	1	1	0	1	0	1	0	0	1	0	0	0	0	0	0	0	0	0
LVOY	13	0	0	0	0	0	0	0	0	0	0	0	0	0	0	0	0	0	0	1	0	0	0	0	0	0	0	1	1	1	1	1	1	1	1	0	1	1	1	1	0	0	0	0	0	0	0	0	0
LVOZ	13	0	0	1	0	0	0	0	0	0	0	0	0	0	0	0	0	0	0	1	0	0	0	0	0	0	0	0	1	1	1	1	1	1	1	0	1	1	0	1	0	0	0	0	0	0	0	0	1
LVPA	12	0	0	0	1	0	0	0	0	0	0	0	0	0	0	0	0	0	0	1	0	0	0	0	0	0	0	0	1	1	1	1	1	1	1	0	1	1	0	1	0	0	0	0	0	0	0	0	0
LVPB	14	0	0	0	0	0	0	0	0	0	0	0	0	0	0	0	0	0	1	1	0	0	0	0	0	0	0	1	1	1	0	1	1	0	0	0	1	0	0	1	0	0	0	0	0	0	0	1	0
LVPC	12	0	0	0	0	0	0	0	0	0	0	0	0	0	0	0	0	0	0	1	0	0	0	0	0	0	0	0	1	1	1	1	1	0	1	0	1	0	0	1	0	0	0	0	0	1	1	1	0
LVPD	12	0	0	0	0	0	0	0	0	0	0	0	0	0	0	0	0	0	0	1	0	0	0	0	0	0	0	0	1	1	1	1	1	0	1	0	1	0	0	1	0	0	0	0	0	1	1	1	0
LVPE	9	0	0	0	0	0	0	0	0	0	0	0	0	0	0	0	0	0	0	0	0	0	0	0	0	0	0	0	0	1	1	0	1	1	1	0	0	1	1	0	0	0	0	0	0	1	1	0	0
LVPF	11	0	0	0	0	0	0	0	0	0	0	0	0	0	0	0	0	0	0	1	0	0	0	0	0	0	0	0	1	1	1	1	1	1	1	0	1	1	0	1	0	0	0	0	0	0	0	0	0
LVPG	16	0	0	0	1	0	0	0	0	0	0	0	0	0	0	0	0	1	0	0	0	0	0	0	0	0	0	0	1	1	1	1	1	1	1	0	1	1	1	1	0	0	0	0	0	1	1	1	0
LVPH	10	0	0	0	0	0	0	0	0	0	0	0	0	0	0	0	0	0	0	1	0	0	0	0	0	0	0	0	1	1	1	1	1	0	1	0	1	0	0	1	0	0	0	0	0	0	0	1	0
LVPI	11	0	0	0	0	0	0	0	0	0	0	0	0	0	0	0	0	0	0	1	0	0	0	0	0	0	0	1	1	1	1	1	1	0	1	0	1	1	0	1	0	0	0	0	0	0	0	0	0
LVPJ	7	0	0	0	0	0	0	0	0	0	0	0	0	0	0	0	0	0	0	0	0	0	0	0	0	0	0	0	0	1	1	0	1	1	1	0	0	1	1	0	0	0	0	0	0	0	0	0	0
LVPK	11	0	0	0	0	0	0	0	0	0	0	0	0	0	0	0	0	0	0	1	0	0	0	0	0	0	0	1	1	1	1	1	1	0	1	0	1	1	0	1	0	0	0	0	0	0	0	0	0
LVPL	11	0	0	0	0	0	0	0	0	0	0	0	0	0	0	0	0	0	0	1	0	0	0	0	0	0	0	0	1	1	1	1	1	1	1	0	1	1	0	1	0	0	0	0	0	0	0	0	0
LVPM	2	0	0	0	1	1	0	0	0	0	0	0	0	0	0	0	0	0	0	0	0	0	0	0	0	0	0	0	0	0	0	0	0	0	0	0	0	0	0	0	0	0	0	0	0	0	0	0	0
LVPN	12	0	0	0	0	0	0	0	0	0	0	0	0	0	0	0	0	0	0	1	0	0	0	0	0	0	0	0	1	1	1	1	1	1	1	0	1	1	0	1	0	0	0	0	0	0	0	1	0
LVPO	11	0	0	0	0	0	0	0	0	0	0	0	0	0	0	0	0	0	0	1	0	0	0	0	0	0	0	0	1	1	1	1	1	1	1	0	1	1	0	1	0	0	0	0	0	0	0	0	0
LVPP	9	0	0	0	0	0	0	0	0	0	0	0	0	0	0	0	0	0	0	1	0	0	0	0	0	0	0	0	1	1	0	1	1	1	0	0	1	1	0	1	0	0	0	0	0	0	0	0	0
LVPQ	11	0	0	0	0	0	0	0	0	0	0	0	0	0	0	0	0	0	0	1	0	0	0	0	0	0	0	0	1	1	1	1	1	1	1	0	1	1	0	1	0	0	0	0	0	0	0	0	0
LVPR	11	0	0	0	0	0	0	0	0	0	0	0	0	0	0	0	0	0	0	1	0	0	0	0	0	0	0	0	1	1	1	1	1	1	1	0	1	1	0	1	0	0	0	0	0	0	0	0	0
LVPS	13	0	0	1	0	0	0	0	0	0	0	0	0	0	0	0	0	0	0	1	0	0	0	0	0	0	0	0	1	1	1	1	1	1	1	0	1	1	0	1	0	0	0	0	0	0	0	0	1
LVPT	7	0	0	0	0	0	0	0	0	0	0	0	0	0	0	0	0	0	0	0	0	0	0	0	0	0	0	0	0	1	1	0	1	1	1	0	0	1	1	0	0	0	0	0	0	0	0	0	0
LVPU	14	0	0	0	0	0	0	0	0	0	0	0	0	0	0	0	0	1	0	1	0	0	0	0	0	0	0	0	1	1	1	1	1	1	1	0	1	1	0	1	0	0	0	0	0	1	1	0	0
LVPV	14	0	0	0	0	0	0	0	0	0	0	0	0	0	0	0	0	1	0	1	0	0	0	0	0	0	0	0	1	1	1	1	1	1	1	0	1	1	0	1	0	0	0	0	0	1	1	0	0
LVPW	5	0	0	1	1	1	0	0	0	0	0	0	0	0	0	0	0	0	0	0	0	0	0	0	0	0	0	0	0	0	0	0	0	0	0	0	0	0	0	0	0	0	0	0	0	0	0	1	1
LVPX	6	0	0	1	1	1	0	0	0	0	0	0	0	0	0	0	0	0	0	1	0	0	0	0	0	0	0	0	0	0	0	0	0	0	0	0	0	0	0	0	0	0	0	0	0	0	0	0	1
LVPY	10	0	0	0	0	0	0	0	0	0	0	0	1	0	0	0	0	0	0	0	0	0	0	0	0	0	0	0	0	0	0	0	0	0	0	0	0	0	0	0	0	0	0	0	0	0	0	0	0
LVPZ	13	0	0	1	0	0	0	0	0	0	0	0	0	0	0	0	0	0	0	1	0	0	0	0	0	0	0	0	1	1	1	1	1	1	1	0	1	1	0	1	0	0	0	0	0	0	0	0	1
LVQA	13	0	0	1	0	0	0	0	0	0	0	0	0	0	0	0	0	0	0	1	0	0	0	0	0	0	0	0	1	1	1	1	1	1	1	0	1	1	0	1	0	0	0	0	0	0	0	0	1
LVQB	12	0	0	0	0	0	0	0	0	0	0	0	0	0	0	0	0	0	0	1	0	0	0	0	0	0	0	0	1	1	1	1	1	1	1	0	1	1	0	1	0	0	0	0	0	0	0	0	0
LVQC	21	0	0	0	0	0	0	0	0	0	0	0	0	0	0	0	0	0	0	0	0	1	0	1	1	0	0	0	1	1	1	1	1	1	1	0	1	1	1	1	0	0	0	0	0	1	1	0	0
LVQD	11	0	0	0	0	0	0	0	0	0	0	0	0	0	0	0	0	0	0	1	0	0	0	0	0	0	0	0	1	1	0	1	1	0	0	0	1	0	0	1	0	0	0	0	0	0	0	0	0
LVQE	21	0	0	0	0	0	0	0	0	0	0	0	0	0	0	0	0	0	0	0	0	1	0	1	1	0	0	0	1	1	1	1	1	1	1	0	1	1	1	1	0	0	0	0	0	1	1	0	0
LVQF	13	0	0	0	0	0	0	0	0	0	0	0	0	0	0	0	0	0	0	1	0	0	0	0	0	0	0	1	1	1	1	1	1	1	1	0	1	1	1	1	0	0	0	0	0	0	0	0	0
LVQG	3	0	0	0	0	0	0	0	0	0	0	0	0	0	0	0	0	0	0	0	0	0	0	0	0	1	0	0	0	0	0	0	0	0	0	0	0	0	0	0	0	0	0	0	0	0	0	1	0
LVQH	7	0	0	0	0	0	0	0	0	0	0	0	0	0	0	0	0	0	1	0	1	0	0	0	0	0	0	0	0	0	0	0	0	0	0	0	0	0	0	0	0	0	0	0	0	0	0	1	0
LVQI	1	0	0	0	0	0	0	0	0	0	0	0	0	0	0	0	0	0	0	0	0	0	0	0	0	0	0	0	0	0	0	0	0	0	0	0	0	0	0	0	0	0	0	0	0	0	0	1	0
LVQJ	1	0	0	0	0	0	0	0	0	0	0	0	0	0	0	0	0	0	0	0	1	0	0	0	0	0	0	0	0	0	0	0	0	0	0	0	0	0	0	0	0	0	0	0	0	0	0	0	0
LVQK	4	0	0	0	0	0	0	0	0	0	0	0	0	0	0	0	0	0	0	0	0	0	0	0	0	0	0	0	0	0	0	0	0	0	0	0	0	0	0	0	0	0	0	0	0	0	0	0	0
LVQL	0	0	0	0	0	0	0	0	0	0	0	0	0	0	0	0	0	0	0	0	0	0	0	0	0	0	0	0	0	0	0	0	0	0	0	0	0	0	0	0	0	0	0	0	0	0	0	0	0
LVQM	10	0	0	0	0	0	0	0	0	0	0	0	0	0	1	0	0	0	0	1	0	0	0	0	0	0	0	0	1	1	1	1	1	0	1	0	1	0	0	1	0	0	0	0	0	0	0	0	0
LVQN	5	0	0	1	1	0	0	0	0	0	0	0	0	0	0	0	0	0	0	1	0	0	0	0	0	0	0	0	0	0	0	0	0	0	0	0	0	0	0	0	0	0	0	0	0	0	0	0	1
LVQO	13	0	0	0	0	0	0	0	0	0	0	0	0	0	0	0	0	0	0	1	0	0	0	0	0	0	0	1	1	1	1	1	1	1	1	0	1	1	1	1	0	0	0	0	0	0	0	0	0
LVQP	0	0	0	0	0	0	0	0	0	0	0	0	0	0	0	0	0	0	0	0	0	0	0	0	0	0	0	0	0	0	0	0	0	0	0	0	0	0	0	0	0	0	0	0	0	0	0	0	0
LVQQ	3	0	0	0	0	1	0	0	0	0	0	0	0	0	0	0	0	0	0	0	0	0	0	0	0	0	0	0	0	0	0	0	0	0	0	0	0	0	0	0	0	0	0	0	0	0	0	0	0
LVQR	22	0	0	0	0	0	0	0	0	0	0	0	0	0	0	0	0	0	0	1	0	0	0	0	0	0	0	1	1	1	1	1	1	1	1	0	1	1	1	1	0	0	0	0	0	1	1	1	0
LVQS	3	0	0	0	0	1	0	0	0	0	0	0	0	0	0	0	0	0	0	0	0	0	0	0	0	0	0	0	0	0	0	0	0	0	0	0	0	0	0	0	0	0	0	0	0	0	0	0	0
LVQT	6	0	0	1	1	1	0	0	0	0	0	0	0	0	0	0	0	0	0	1	0	0	0	0	0	0	0	0	0	0	0	0	0	0	0	0	0	0	0	0	0	0	0	0	0	0	0	0	1
LVQU	0	0	0	0	0	0	0	0	0	0	0	0	0	0	0	0	0	0	0	0	0	0	0	0	0	0	0	0	0	0	0	0	0	0	0	0	0	0	0	0	0	0	0	0	0	0	0	0	0
LVQV	0	0	0	0	0	0	0	0	0	0	0	0	0	0	0	0	0	0	0	0	0	0	0	0	0	0	0	0	0	0	0	0	0	0	0	0	0	0	0	0	0	0	0	0	0	0	0	0	0
LVQW	10	0	0	0	0	0	0	0	0	0	0	0	0	0	0	0	0	0	0	1	0	0	0	0	0	0	0	0	1	1	1	1	1	0	1	0	1	0	0	1	0	0	0	0	0	0	0	1	0
LVQX	12	0	0	0	0	0	0	0	0	0	0	0	0	0	0	0	0	0	0	1	0	0	0	0	0	0	0	0	1	1	1	1	1	1	1	0	1	1	0	1	0	0	0	0	0	0	0	0	0
LVQY	13	0	0	0	0	0	0	0	0	0	0	0	0	0	0	0	0	0	0	1	0	0	0	0	0	0	0	0	1	1	1	1	1	1	1	0	1	1	0	1	0	0	0	0	0	1	1	0	0
LVQZ	1	0	0	0	0	0	0	0	0	0	0	0	0	0	0	0	0	0	0	1	0	0	0	0	0	0	0	0	0	0	0	0	0	0	0	0	0	0	0	0	0	0	0	0	0	0	0	0	0
LVRA	20	1	1	0	1	0	0	0	1	0	0	0	0	0	1	0	0	1	0	1	0	0	0	0	0	0	0	0	1	1	1	1	1	1	1	0	1	1	1	1	0	0	0	0	0	1	1	0	0
MOKV	18	0	0	1	1	1	1	0	0	0	0	0	1	0	0	0	1	0	0	0	0	0	0	0	0	0	0	0	0	0	1	0	1	1	1	0	1	1	1	0	0	0	0	0	0	0	0	1	1
MOKW	14	0	0	0	0	0	0	0	0	0	0	0	1	0	0	0	0	0	1	0	1	0	0	0	0	0	0	0	1	1	1	1	1	0	1	0	1	1	0	1	0	0	0	0	0	0	0	0	0
MOKX	21	0	0	0	0	1	0	1	0	0	0	0	1	0	0	1	0	0	0	1	0	0	0	0	0	0	0	1	1	1	1	1	1	1	1	0	1	1	1	1	0	0	0	0	0	1	1	1	0
MOKY	22	0	0	1	1	0	0	0	0	0	0	0	1	0	0	1	0	0	0	1	0	0	0	0	0	0	0	1	1	1	1	1	1	1	1	0	1	1	1	1	0	0	0	0	0	1	1	1	1
MOLA	15	0	0	0	0	0	0	0	0	0	0	0	0	0	0	0	0	0	0	1	0	0	0	0	0	0	0	1	1	1	1	1	1	1	1	0	1	1	1	1	0	0	0	0	0	1	1	0	0
MOLB	16	0	0	0	1	0	0	0	0	0	0	0	0	0	0	0	0	0	0	1	0	0	0	0	0	0	0	1	1	1	1	1	1	1	1	0	1	1	1	1	0	0	0	0	0	1	1	0	0
MOLC	23	0	0	0	0	0	0	0	0	1	0	0	1	0	0	0	0	1	0	1	0	0	0	0	0	0	0	0	1	1	1	1	1	0	1	0	1	1	0	1	0	0	0	1	1	1	1	0	0
MOLD	16	0	0	1	1	1	1	0	0	0	0	0	0	0	0	0	0	0	0	0	0	0	0	0	0	0	0	0	0	0	1	0	1	1	1	0	1	1	1	0	0	0	0	0	0	0	0	0	1
MOLE	19	0	0	0	0	0	0	1	0	0	0	0	1	0	0	0	0	0	0	1	0	0	0	0	0	0	0	1	1	1	1	1	1	1	1	0	1	1	1	1	0	0	0	0	0	1	1	1	0
MOLF	17	0	0	1	1	1	1	0	0	0	0	0	0	0	0	0	0	0	0	0	0	0	0	0	0	0	0	0	0	0	1	0	1	1	1	0	1	1	1	0	0	0	0	1	0	0	0	0	1
MOLG	14	0	0	0	0	0	0	0	0	0	0	0	0	0	0	0	0	0	0	1	0	0	0	0	0	0	0	1	1	1	1	1	1	1	1	0	1	1	1	1	0	0	0	0	0	0	0	0	0
MOLH	20	1	1	0	1	0	0	0	0	0	0	0	0	0	0	0	0	1	0	1	0	0	0	0	0	0	0	0	1	1	0	1	1	0	0	0	1	0	0	1	0	0	0	0	0	0	0	1	0
MTPN	18	0	0	0	0	0	0	0	0	0	0	0	0	0	0	0	0	0	0	1	0	0	0	0	0	0	0	1	1	1	1	1	1	1	1	0	1	1	1	1	0	0	0	0	0	0	0	1	0
NC11-62	10	0	0	0	0	0	0	0	0	0	0	0	0	0	0	0	0	0	0	0	0	0	0	0	0	0	0	0	1	1	0	1	1	1	0	0	1	1	0	1	1	1	0	0	0	0	0	0	0
NC3-1-2013	11	0	0	0	0	0	0	0	0	0	0	0	1	0	0	0	0	0	0	1	0	0	0	0	0	0	0	0	1	1	0	1	1	0	0	0	1	0	0	1	0	0	0	0	0	0	0	1	0
NOIE	1	0	0	0	0	0	0	0	0	0	0	0	0	0	0	0	0	0	0	0	0	0	0	0	0	0	0	0	0	0	0	0	0	0	0	0	0	0	0	0	0	0	0	0	0	0	0	0	0
NXMU	10	0	0	0	0	0	0	0	0	0	0	0	0	0	0	0	0	1	0	1	0	0	0	0	0	0	0	0	1	1	0	1	1	0	0	0	1	0	1	1	0	0	0	0	0	0	0	0	0
P-103	6	0	0	0	0	0	0	0	0	0	0	0	0	0	0	0	0	0	1	0	1	0	0	0	0	0	0	0	0	0	0	0	0	0	0	0	0	0	0	0	0	0	0	0	0	0	0	0	0
P1-109	12	0	0	0	0	0	0	0	0	0	0	0	1	0	0	0	0	0	0	1	0	0	0	0	0	0	0	1	1	1	0	1	1	0	0	0	1	0	0	1	0	0	0	0	0	0	0	0	0
P1-2	27	0	0	1	1	1	0	0	0	0	0	0	1	0	0	0	0	0	0	1	0	0	0	0	0	0	0	1	1	1	1	1	1	1	1	0	1	1	1	1	0	0	0	0	0	0	0	1	1
P1-59	3	0	0	0	0	0	0	0	0	0	0	0	0	0	0	0	0	0	0	0	0	0	0	0	0	1	0	0	0	0	0	0	0	0	0	0	0	0	0	0	0	0	0	0	0	0	0	0	0
P1-60	14	0	0	1	1	1	0	0	0	0	1	0	0	1	0	0	0	0	0	0	0	0	0	0	0	0	0	0	1	1	1	1	1	0	1	0	1	0	0	1	0	0	0	0	0	0	0	0	1
P1-76	12	0	0	0	1	0	0	0	0	0	0	0	0	0	0	0	0	0	0	0	0	0	0	0	0	0	0	0	1	1	1	1	1	1	1	0	1	1	0	1	0	0	0	0	0	0	0	0	0
P1-82	5	0	0	0	0	0	0	0	0	0	0	0	0	0	0	0	0	0	0	1	1	0	0	0	0	0	0	0	0	0	0	0	0	0	0	0	0	0	0	0	0	0	0	0	0	1	1	0	0
P1-85	17	0	0	0	0	0	0	0	0	0	0	0	0	0	0	0	0	0	0	1	0	0	0	0	0	0	0	1	1	1	1	1	1	1	1	0	1	1	1	1	0	0	0	0	0	0	0	0	0
Pg8	11	0	0	0	0	0	0	0	0	0	0	0	1	0	0	0	0	0	0	1	0	0	0	0	0	0	0	0	1	1	0	1	1	0	0	0	1	0	0	1	0	0	0	0	0	1	1	0	0
PTMC	0	0	0	0	0	0	0	0	0	0	0	0	0	0	0	0	0	0	0	0	0	0	0	0	0	0	0	0	0	0	0	0	0	0	0	0	0	0	0	0	0	0	0	0	0	0	0	0	0
PTMD	17	0	0	0	1	0	0	0	0	0	0	0	0	0	0	0	0	0	0	1	0	0	1	0	0	0	1	0	1	1	1	1	1	0	1	0	1	1	0	1	0	0	0	0	0	1	1	1	0
PTME	14	0	0	0	0	0	0	0	0	0	0	0	0	0	0	0	0	0	0	1	0	0	0	0	0	0	0	1	1	1	1	1	1	0	1	0	1	0	0	1	0	0	0	1	1	0	0	0	0
PTMF	10	0	0	0	0	0	0	0	0	0	0	0	0	0	0	0	0	0	1	0	1	0	1	0	0	0	1	0	0	0	0	0	0	0	0	0	0	0	0	0	0	0	0	1	1	0	0	0	0
PTMG	7	0	0	0	0	0	0	0	0	0	0	0	0	0	0	0	0	0	0	0	0	0	0	0	0	1	0	0	0	0	0	0	0	0	0	0	0	0	0	0	0	1	0	1	1	0	0	0	0
PTMH	5	0	0	0	0	0	0	0	0	0	0	0	0	0	0	0	0	0	0	0	0	0	0	0	0	0	0	0	0	0	0	0	0	0	0	0	0	0	0	0	0	0	0	0	0	0	0	0	0
PTMI	11	0	0	0	0	1	0	0	0	0	0	0	0	0	0	0	0	1	0	1	0	0	0	0	0	0	0	0	1	0	1	1	0	1	1	0	0	1	1	0	0	0	0	0	0	0	0	1	0
PTMJ	13	0	0	0	0	0	0	0	0	0	0	0	0	0	0	0	0	1	0	1	0	0	0	0	0	0	0	0	1	1	0	1	1	0	0	0	1	0	0	1	0	0	0	0	0	0	0	0	0
PTMK	4	0	0	0	0	0	0	0	0	0	0	0	0	0	0	0	0	0	0	0	1	0	0	0	0	0	0	0	0	0	0	0	0	0	0	0	0	0	0	0	0	0	0	1	1	0	0	0	0
PTML	18	0	0	0	1	0	0	0	0	0	0	0	0	0	0	0	0	0	1	1	0	0	0	0	0	0	0	1	1	1	0	1	1	0	0	0	1	0	0	1	1	1	1	0	0	0	0	0	0
PTMM	13	0	0	0	0	1	0	0	0	0	0	0	0	0	0	0	0	0	0	1	0	0	1	0	0	0	1	0	1	1	0	1	1	0	0	0	1	0	0	1	0	0	0	0	0	0	0	1	0
PTMN	20	0	0	0	1	0	0	0	0	0	0	0	0	0	0	0	0	0	0	1	0	0	0	0	0	0	0	1	1	1	1	1	1	1	1	0	1	1	1	1	0	0	0	0	0	1	1	0	0
PTMO	17	0	0	0	0	0	0	0	0	0	0	0	0	0	0	0	0	1	0	1	0	0	0	0	0	0	0	1	1	1	1	1	1	1	1	0	1	1	1	1	0	0	0	1	1	0	0	0	0
PTMP	7	0	0	0	0	0	0	0	0	0	0	0	0	0	0	0	0	0	0	0	1	0	0	0	0	0	0	0	0	0	0	0	0	0	0	0	0	0	0	0	0	1	0	0	0	0	0	1	0
PTMQ	14	0	0	0	0	0	0	0	0	0	0	0	0	0	0	0	0	0	0	1	0	0	0	0	0	0	0	1	1	1	1	1	1	1	1	0	1	1	1	1	0	0	0	0	0	0	0	1	0
PTMR	5	0	0	0	0	0	0	0	0	0	0	0	0	0	0	0	0	0	0	0	1	0	0	0	0	0	0	0	0	0	0	0	0	0	0	0	0	0	0	0	0	0	0	1	1	0	0	0	0
PTMS	14	0	0	0	0	0	0	0	0	0	0	0	0	0	0	0	0	0	0	1	0	0	0	0	0	0	0	1	1	1	1	1	1	1	1	0	1	1	1	1	0	0	0	0	0	0	0	1	0
PTMT	15	0	0	0	0	0	0	0	0	0	0	0	0	0	0	0	0	0	0	0	0	0	0	0	0	0	0	0	0	0	1	0	1	1	1	0	1	1	1	0	0	1	0	1	1	0	0	0	0
PTMU	4	0	0	0	0	0	0	0	0	0	0	0	0	0	0	0	0	0	0	0	1	0	1	0	0	0	1	0	0	0	0	0	0	0	0	0	0	0	0	0	0	0	0	0	0	0	0	0	0
PTMV	2	0	0	0	0	0	0	0	0	0	0	0	0	0	0	0	0	0	0	0	0	0	0	0	0	0	0	0	0	0	0	0	0	0	0	0	0	0	0	0	0	0	0	0	0	0	0	1	0
PTMW	12	0	0	0	0	0	0	0	0	0	0	0	0	0	0	0	0	0	0	1	0	0	0	0	0	0	0	0	1	1	0	1	1	0	0	0	1	0	0	1	0	0	0	0	0	0	0	1	0
PTMX	6	0	0	0	0	0	0	0	0	0	0	0	0	0	0	0	0	0	0	0	0	0	0	0	0	1	0	0	0	0	0	0	0	0	0	0	0	0	0	0	0	1	0	1	1	0	0	0	0
PTMY	10	0	0	0	0	1	0	0	0	0	0	0	0	0	0	0	0	0	0	0	0	0	0	0	0	0	0	0	0	0	1	0	1	1	1	0	1	1	1	0	0	0	0	0	0	0	0	1	0
PTMZ	18	0	0	0	0	1	0	0	0	0	0	0	0	0	0	0	0	0	0	1	0	0	1	0	0	0	1	0	1	1	1	1	1	1	1	0	1	1	1	1	0	0	0	0	0	1	1	1	0
PTNA	22	1	1	0	1	0	0	0	0	0	0	0	0	0	0	0	0	0	0	1	0	0	0	0	0	0	0	1	1	1	1	1	1	1	1	0	1	1	1	1	0	0	0	0	0	1	1	1	0
PTNB	10	0	0	0	0	1	0	0	0	0	0	0	0	0	0	0	0	0	0	0	0	0	0	0	0	0	0	0	0	0	1	0	1	1	1	0	1	1	1	0	0	0	0	0	0	0	0	1	0
PTNC	13	0	0	0	0	0	0	0	0	0	0	0	1	0	0	0	0	0	0	0	1	0	1	0	0	0	1	0	0	0	1	0	1	1	1	0	1	1	1	0	0	0	0	0	0	0	0	1	0
PTND	21	1	1	0	0	0	0	0	0	0	0	0	0	0	0	0	0	0	0	1	0	0	0	0	0	0	0	1	1	1	1	1	1	1	1	0	1	1	1	1	0	0	0	0	0	1	1	1	0
PTNE	8	0	0	0	0	0	0	0	0	0	0	0	0	0	0	0	0	0	1	0	1	0	0	0	0	0	0	0	0	0	0	0	0	0	0	0	0	0	0	0	0	0	0	1	1	0	0	0	0
PTNF	11	0	0	0	0	0	0	0	0	0	0	0	0	0	0	0	0	0	0	1	1	0	0	0	0	0	0	1	1	1	0	1	1	0	0	0	1	0	0	1	0	0	0	1	1	0	0	0	0
PTNG	10	0	0	0	0	0	0	0	0	0	0	0	0	0	0	0	0	0	0	0	1	0	0	0	0	0	0	0	0	0	0	0	0	0	0	0	0	0	0	0	0	0	0	0	0	0	0	0	0
PTNH	5	0	0	0	0	0	0	0	0	0	0	0	0	0	0	0	0	0	0	0	0	0	0	0	0	1	0	0	0	0	0	0	0	0	0	0	0	0	0	0	0	1	0	1	1	0	0	0	0
PTNI	9	0	0	0	0	0	0	0	0	0	0	0	0	0	0	0	0	0	0	0	0	0	0	0	0	0	0	0	1	1	0	1	1	0	0	0	1	0	0	1	0	1	0	0	0	0	0	1	0
PTNJ	17	0	0	0	0	0	0	0	0	0	0	0	0	0	0	0	0	0	0	1	0	0	0	0	0	0	0	1	1	1	1	1	1	1	1	0	1	1	1	1	0	0	0	1	1	0	0	1	0
PTNK	15	0	0	0	0	0	0	0	0	0	0	0	0	0	0	0	0	0	0	1	0	0	0	0	0	0	0	0	1	1	1	1	1	0	1	0	1	1	0	1	0	1	0	0	0	1	1	1	0
PTNL	16	0	0	0	0	0	0	0	0	0	0	0	0	0	0	0	0	0	0	1	0	0	1	0	0	0	1	0	1	1	1	1	1	1	1	0	1	1	1	1	0	0	0	0	0	0	0	1	0
PTNM	9	0	0	0	0	0	0	0	0	0	0	0	0	0	0	0	0	0	0	1	1	0	0	0	0	0	0	0	1	1	0	1	1	0	0	0	1	0	0	1	0	0	0	0	0	0	0	1	0
PTNN	22	0	0	0	1	0	0	0	0	0	0	0	0	0	0	0	0	0	0	1	0	0	0	0	0	0	0	1	1	1	1	1	1	1	1	0	1	1	1	1	0	0	0	1	1	1	1	0	0
PTNO	17	0	0	0	0	0	0	0	0	0	0	0	0	0	0	0	0	1	0	1	0	0	0	0	0	0	0	1	1	1	1	1	1	1	1	0	1	1	1	1	0	0	0	1	1	0	0	0	0
PTNP	2	0	0	0	0	0	0	0	0	0	0	0	0	0	0	0	0	0	0	0	0	0	0	0	0	0	0	0	0	0	0	0	0	0	0	0	0	0	0	0	0	0	0	0	0	0	0	1	0
PTNQ	11	0	0	0	0	1	0	0	0	0	0	0	0	0	0	0	0	1	0	1	0	0	0	0	0	0	0	0	1	0	1	1	0	1	1	0	0	1	1	0	0	0	0	0	0	0	0	1	0
PTNR	4	0	0	0	0	0	0	0	0	0	0	0	0	0	0	0	0	0	0	0	1	0	0	0	0	0	0	0	0	0	0	0	0	0	0	0	0	0	0	0	0	0	0	1	1	0	0	0	0
PTNS	5	0	0	0	0	0	0	0	0	0	0	0	0	0	0	0	0	0	0	0	1	0	0	0	0	0	0	0	0	0	0	0	0	0	0	0	0	0	0	0	0	1	0	0	0	0	0	1	0
PTNT	9	0	0	0	0	0	0	0	0	0	0	0	0	0	0	0	0	0	0	1	0	0	0	0	0	0	0	0	1	1	0	1	1	0	0	0	1	0	0	1	0	0	0	0	0	0	0	1	0
PTNU	12	0	0	0	0	0	0	0	0	0	0	0	0	0	0	0	0	0	0	1	0	0	0	0	0	0	0	0	0	1	1	1	1	1	1	0	1	1	1	1	0	0	0	0	0	0	0	0	0
PTNV	6	0	0	0	0	0	0	0	0	0	0	0	0	0	0	0	0	0	1	0	0	0	0	0	0	0	0	0	0	0	0	0	0	0	0	0	0	0	0	0	0	0	0	0	0	0	0	1	0
PTNW	13	0	0	0	0	0	0	0	0	0	0	0	0	0	0	0	0	0	0	1	0	0	0	0	0	0	0	1	1	1	1	1	1	1	1	0	1	1	1	1	0	0	0	0	0	0	0	0	0
PTNX	14	0	0	0	0	0	0	0	0	0	0	0	0	0	0	0	0	1	0	1	0	0	0	0	0	0	0	1	1	1	1	1	1	0	1	0	1	0	0	1	0	0	0	1	1	0	0	0	0
PTNZ	12	0	0	0	0	0	0	0	0	0	0	0	0	0	0	0	0	0	0	1	0	0	0	0	0	0	0	0	0	1	1	1	1	1	1	0	1	1	1	1	0	0	0	0	0	0	0	0	0
PTOA	8	0	0	0	0	0	0	0	0	0	0	0	0	0	0	0	0	0	0	1	0	0	0	0	0	0	0	1	1	1	0	1	1	0	0	0	1	0	0	1	0	0	0	0	0	0	0	0	0
PTOB	2	0	0	0	0	0	0	0	0	0	0	0	0	0	0	0	0	0	0	0	0	0	0	0	0	0	0	0	0	0	0	0	0	0	0	0	0	0	0	0	0	0	0	1	1	0	0	0	0
PTOC	2	0	0	0	0	0	0	0	0	0	0	0	0	0	0	0	0	0	0	0	0	0	0	0	0	0	0	0	0	0	0	0	0	0	0	0	0	0	0	0	0	0	0	0	0	1	1	0	0
PTOD	13	0	0	0	0	0	0	0	0	0	0	0	0	0	0	0	0	1	0	1	0	0	0	0	0	0	0	1	1	1	1	1	1	0	1	0	1	0	0	1	0	0	0	1	1	0	0	0	0
PTOE	2	0	0	1	0	0	0	0	0	0	0	0	0	0	0	0	0	0	0	0	0	0	0	0	0	0	0	0	0	0	0	0	0	0	0	0	0	0	0	0	0	0	0	0	0	0	0	0	1
PTOF	18	0	0	0	0	0	0	0	0	0	0	0	0	0	0	0	0	0	0	1	0	0	0	0	0	0	0	1	1	1	1	1	1	1	1	0	1	1	1	1	0	0	0	0	0	0	0	0	0
PTOG	11	0	0	0	0	0	0	0	0	0	0	0	0	0	0	0	0	0	0	1	0	0	0	0	0	0	0	0	1	1	1	1	1	0	1	0	1	0	0	1	0	0	0	0	0	1	1	0	0
PTOH	13	0	0	0	0	0	0	0	0	0	0	0	0	0	0	0	0	0	0	1	0	0	0	0	0	0	0	1	1	1	1	1	1	1	1	0	1	1	1	1	0	0	0	0	0	0	0	0	0
PTOI	3	0	0	0	0	0	0	0	0	0	0	0	1	0	0	0	0	0	0	0	1	0	0	0	0	0	0	0	0	0	0	0	0	0	0	0	0	0	0	0	0	0	0	0	0	0	0	0	0
PTOJ	20	0	0	0	0	1	0	0	0	0	0	0	1	0	0	0	0	0	0	1	0	0	0	0	0	0	0	1	1	1	1	1	1	1	1	0	1	1	1	1	0	0	0	0	0	0	0	0	0
PTOK	12	0	0	0	1	0	0	0	0	0	0	0	0	0	0	0	0	1	0	1	0	0	0	0	0	0	0	1	1	1	1	1	1	0	1	0	1	0	0	1	0	0	0	0	0	0	0	0	0
PTOL	8	0	0	0	0	0	0	0	0	0	0	0	0	0	0	0	0	0	0	0	0	0	0	0	0	0	0	0	0	0	1	0	1	1	1	0	1	1	1	0	0	0	0	0	0	0	0	0	0
PU-1	13	0	0	0	0	0	0	0	0	0	0	0	0	0	0	0	0	0	0	1	0	0	0	0	0	0	0	1	1	1	1	1	1	1	1	0	1	1	1	1	0	0	0	0	0	0	0	0	0
PUDS	16	0	0	0	0	0	0	1	0	0	0	0	1	0	0	0	0	0	0	1	0	0	0	0	0	0	0	0	1	1	1	1	1	1	1	0	1	1	0	1	0	1	0	0	0	0	0	1	0
PUDT	19	0	0	0	1	1	0	0	0	0	0	0	0	0	1	0	0	0	0	1	0	0	0	0	0	0	0	1	1	1	1	1	1	1	1	0	1	1	1	1	0	0	0	1	1	0	0	0	0
PUDU	21	0	0	0	1	0	0	0	0	0	0	0	1	0	1	0	0	0	0	1	0	0	0	0	0	0	0	0	1	1	1	1	1	1	1	0	1	1	1	1	0	0	0	1	1	0	0	1	0
PUDV	5	0	0	0	0	0	0	0	0	0	0	0	1	0	1	0	0	0	0	0	1	0	0	0	0	0	0	0	0	0	0	0	0	0	0	0	0	0	0	0	0	0	0	0	0	0	0	1	0
PUDW	13	0	0	0	0	0	0	0	0	0	0	0	0	0	0	0	0	1	0	1	0	0	0	0	0	0	0	0	1	1	0	1	1	0	0	0	1	0	0	1	0	0	0	0	0	0	0	0	0
PUDX	18	0	0	0	0	0	0	0	0	0	0	0	0	0	0	0	0	0	0	1	0	0	0	0	0	0	0	0	1	1	1	1	1	1	1	0	1	1	1	1	0	0	0	1	1	0	0	1	0
PUDY	16	0	0	0	0	1	0	0	0	0	0	0	0	0	0	0	0	1	0	1	0	0	0	0	0	0	0	1	1	1	1	1	1	1	1	0	1	1	1	1	0	0	0	0	0	0	0	1	0
PUDZ	7	0	0	0	0	1	0	0	0	0	0	0	1	0	0	0	0	0	0	0	1	0	0	0	0	0	0	0	0	0	0	0	0	0	0	0	0	0	0	0	0	0	0	0	0	0	0	1	0
PUEA	15	0	0	0	0	0	0	0	0	0	0	0	0	0	0	0	0	0	0	1	0	0	0	0	0	0	0	1	1	1	1	1	1	1	1	0	1	1	1	1	0	0	0	0	0	0	0	0	0
PUEB	6	0	0	0	0	0	0	0	0	0	0	0	0	0	0	0	0	0	0	1	0	0	0	0	0	0	0	0	0	0	0	0	0	0	0	0	0	0	0	0	0	1	0	1	1	0	0	0	0
QETO	14	0	0	0	0	1	0	0	0	0	0	0	0	0	0	0	0	0	0	1	0	0	0	0	0	0	0	1	1	1	1	1	1	1	1	0	1	1	1	1	0	0	0	0	0	0	0	0	0
QETP	22	0	0	0	1	1	0	0	0	0	0	0	0	0	0	0	0	0	0	1	0	0	0	0	0	0	0	1	1	1	1	1	1	1	1	0	1	1	1	1	0	0	0	0	0	1	1	0	0
QETQ	0	0	0	0	0	0	0	0	0	0	0	0	0	0	0	0	0	0	0	0	0	0	0	0	0	0	0	0	0	0	0	0	0	0	0	0	0	0	0	0	0	0	0	0	0	0	0	0	0
QETR	2	0	0	0	0	0	0	0	0	0	0	0	0	0	0	0	0	0	0	0	0	0	0	0	0	0	0	0	0	0	0	0	0	0	0	0	0	0	0	0	0	0	0	0	0	0	0	0	0
QETS	6	0	0	0	0	0	0	0	0	0	0	0	0	0	0	0	0	0	0	0	0	0	0	0	0	0	0	0	1	1	0	1	1	0	0	0	1	0	0	1	0	0	0	0	0	0	0	0	0
QETT	0	0	0	0	0	0	0	0	0	0	0	0	0	0	0	0	0	0	0	0	0	0	0	0	0	0	0	0	0	0	0	0	0	0	0	0	0	0	0	0	0	0	0	0	0	0	0	0	0
QETU	21	1	1	0	1	0	0	0	0	0	0	0	0	0	1	0	0	0	0	1	0	0	0	0	0	0	0	1	1	1	1	1	1	1	1	0	1	1	1	1	0	0	0	0	0	1	1	0	0
QETV	0	0	0	0	0	0	0	0	0	0	0	0	0	0	0	0	0	0	0	0	0	0	0	0	0	0	0	0	0	0	0	0	0	0	0	0	0	0	0	0	0	0	0	0	0	0	0	0	0
QETW	16	0	0	0	0	0	0	0	0	0	0	0	0	0	0	0	0	0	0	1	0	0	1	0	0	0	1	1	1	1	1	1	1	1	1	0	1	1	1	1	0	0	0	0	0	0	0	0	0
QETX	6	0	0	0	0	1	0	0	0	0	0	0	0	0	0	0	0	0	0	0	1	0	0	0	0	0	0	0	0	0	0	0	0	0	0	0	0	0	0	0	0	1	0	0	0	1	1	0	0
QETY	12	0	0	0	0	0	0	0	0	0	0	0	0	0	0	0	0	0	0	1	0	0	0	0	0	0	0	0	1	1	0	1	1	0	0	0	1	0	0	1	0	0	0	0	0	0	0	0	0
QETZ	10	0	0	0	0	0	0	1	0	0	0	0	0	0	0	0	0	1	0	1	0	0	0	0	0	0	0	0	0	0	0	0	0	0	0	0	0	0	0	0	0	0	0	0	0	1	1	0	0
QEUA	10	0	0	0	0	0	0	0	0	0	0	0	0	0	0	0	0	0	0	1	1	0	0	0	0	0	0	0	0	0	1	0	1	1	1	0	0	1	1	0	0	0	0	0	0	1	1	0	0
QEUB	5	0	0	0	0	0	0	0	0	0	0	0	0	0	0	0	0	0	0	0	1	0	0	0	0	1	0	0	0	0	0	0	0	0	0	0	0	0	0	0	0	0	0	0	0	0	0	1	0
QEUC	13	0	0	0	0	0	0	0	0	0	0	0	0	0	0	0	0	0	0	0	0	0	0	0	0	0	0	0	0	0	0	0	0	0	0	0	0	0	0	0	0	0	0	1	1	1	1	0	0
QEUD	0	0	0	0	0	0	0	0	0	0	0	0	0	0	0	0	0	0	0	0	0	0	0	0	0	0	0	0	0	0	0	0	0	0	0	0	0	0	0	0	0	0	0	0	0	0	0	0	0
QEUE	11	0	0	0	0	1	0	0	0	0	0	0	0	0	0	0	0	0	0	0	0	0	0	0	0	1	0	0	1	1	0	1	1	0	0	0	1	0	0	1	0	1	0	0	0	1	1	0	0
QEUF	17	0	0	0	0	0	0	0	0	0	0	0	0	0	0	0	0	0	0	1	0	0	0	0	0	1	0	0	1	1	1	1	1	0	1	0	1	1	0	1	0	1	0	0	0	0	0	0	0
QEUG	22	0	0	0	0	1	0	0	0	0	0	0	0	0	0	0	0	0	0	1	0	0	0	0	0	0	0	1	1	1	1	1	1	1	1	0	1	1	1	1	0	0	0	0	0	1	1	0	0
QUOM	8	0	0	0	0	0	0	0	0	0	0	0	0	0	0	0	0	0	0	1	0	0	0	0	0	0	0	0	1	1	0	1	1	0	0	0	1	0	0	1	0	0	0	0	0	0	0	1	0
RRZS	15	0	0	0	0	0	0	0	0	0	0	0	0	0	0	0	0	0	0	1	0	0	0	0	0	0	0	1	1	1	1	1	1	1	1	0	1	1	1	1	0	0	0	0	0	0	0	1	0
S153	15	0	0	0	0	1	0	0	0	0	0	0	0	0	0	0	0	0	0	1	0	0	0	0	0	0	0	0	1	1	0	1	1	0	0	0	1	0	0	1	0	0	0	0	0	1	1	0	0
sc11-16	20	1	1	1	1	0	0	0	0	0	0	0	0	0	0	0	1	0	0	1	0	0	0	0	0	0	0	0	1	1	1	1	1	0	1	0	1	1	0	1	0	0	0	0	0	0	0	0	1
sc11-18	12	0	0	0	0	0	0	0	0	0	0	0	0	0	0	0	0	1	0	1	0	0	0	0	0	0	0	1	1	0	1	1	1	1	1	0	1	1	1	0	0	0	0	0	0	0	0	0	0
sc11-20	12	0	0	0	0	0	0	0	0	0	0	0	0	0	0	0	0	1	0	1	0	0	0	0	0	0	0	1	1	0	1	1	1	1	1	0	1	1	1	0	0	0	0	0	0	0	0	0	0
sc11-23	15	0	0	0	0	0	0	0	0	0	0	0	1	0	0	0	0	1	0	1	0	0	0	0	0	0	0	1	1	0	1	0	1	1	1	0	1	1	1	0	0	1	0	0	0	0	0	1	0
sc11-25	15	0	0	0	0	0	0	0	0	0	0	0	1	0	0	0	0	1	0	1	0	0	0	0	0	0	0	1	1	0	1	0	1	1	1	0	1	1	1	0	0	1	0	0	0	0	0	1	0
sc11-29	17	0	0	0	1	0	0	0	0	0	0	0	1	0	1	0	0	0	0	1	0	0	0	0	0	0	0	0	1	1	0	1	1	0	0	0	1	0	0	1	0	0	0	0	0	1	1	1	0
sc11-30	17	0	0	0	1	0	0	0	0	0	0	0	1	0	1	0	0	0	0	1	0	0	0	0	0	0	0	0	1	1	0	1	1	0	0	0	1	0	0	1	0	0	0	0	0	1	1	1	0
SC11-31	18	0	0	0	1	0	0	0	0	0	0	0	1	0	0	0	0	0	0	0	0	0	0	0	0	0	0	0	1	1	1	1	1	1	1	0	1	1	0	1	0	0	0	0	0	0	0	1	0
SC11-32	17	0	0	0	1	0	0	0	0	0	0	0	1	0	1	0	0	0	0	1	0	0	0	0	0	0	0	0	1	1	0	1	1	0	0	0	1	0	0	1	0	0	0	0	0	1	1	1	0
SC11-33	16	0	0	0	1	0	0	0	0	0	0	0	1	0	0	0	0	0	0	0	0	0	0	0	0	0	0	0	1	1	1	1	1	1	1	0	1	1	1	1	0	0	0	1	1	0	0	1	0
SC11-35	13	0	0	0	0	0	0	0	0	0	0	0	0	0	1	0	0	0	1	0	1	0	0	0	0	0	0	0	1	1	1	1	1	1	1	0	1	1	0	1	0	0	0	0	0	0	0	0	0
SC11-36	12	0	0	0	0	0	0	0	0	0	0	0	0	0	0	0	0	0	1	0	1	0	0	0	0	0	0	0	1	1	1	1	1	1	1	0	1	1	0	1	0	0	0	0	0	0	0	0	0
SC11-38	17	0	0	0	1	0	0	0	0	0	0	0	1	0	1	0	0	0	0	1	0	0	0	0	0	0	0	0	1	1	0	1	1	0	0	0	1	0	0	1	0	0	0	0	0	1	1	1	0
sc11-46	17	0	0	0	0	0	0	0	0	0	0	0	0	0	0	0	0	0	0	0	0	0	0	0	0	0	0	0	1	1	1	1	1	1	1	0	1	1	1	1	0	0	0	0	0	0	0	0	0
sc11-49	17	0	0	0	0	1	0	0	0	0	0	0	1	0	0	0	0	0	0	1	0	0	0	0	0	0	0	0	1	1	1	1	1	0	1	0	1	1	0	1	0	1	0	1	1	0	0	0	0
sc11-51	15	0	0	1	0	0	0	0	0	0	0	0	0	0	0	0	0	0	0	0	0	0	0	0	0	0	0	1	1	0	1	0	1	1	1	0	1	1	1	0	0	0	0	0	0	0	0	0	1
sc11-55	16	0	0	0	1	1	0	0	0	0	0	0	1	0	0	0	1	0	0	1	0	0	0	0	0	0	0	0	1	1	1	1	1	0	1	0	1	1	0	1	0	1	0	0	0	0	0	0	0
sc12-100	18	0	0	0	1	1	0	0	0	0	0	0	1	0	0	0	0	1	0	1	0	0	0	0	0	0	0	1	1	1	1	1	1	1	1	0	1	1	1	1	0	0	0	0	0	0	0	1	0
sc12-57	15	0	0	0	1	0	0	0	0	0	0	0	0	0	0	0	0	0	0	0	0	0	0	0	0	0	0	0	1	1	1	1	1	0	1	0	1	1	0	1	0	0	0	0	0	1	1	0	0
sc12-62	10	0	0	0	1	1	0	0	0	0	0	0	0	0	0	0	0	0	0	0	0	0	0	0	0	0	0	0	1	1	0	1	1	0	0	0	1	0	0	1	0	0	0	0	0	1	1	0	0
sc12-65	16	0	0	0	1	0	0	0	0	0	0	0	0	0	0	0	0	0	0	0	0	0	0	0	0	0	0	0	1	1	1	1	1	0	1	0	1	1	0	1	0	0	0	0	0	1	1	0	0
sc12-67	18	0	0	0	1	1	0	0	0	0	0	0	0	0	0	0	0	0	0	1	0	0	0	0	0	0	0	1	1	1	1	1	1	1	1	0	1	1	1	1	0	0	0	1	1	0	0	0	0
sc12-70	18	0	0	0	0	0	0	0	0	0	0	0	0	0	0	0	0	1	0	1	0	0	0	0	0	0	0	1	1	1	1	1	1	1	1	0	1	1	1	1	0	0	0	1	1	1	1	0	0
sc12-74	0	0	0	0	0	0	0	0	0	0	0	0	0	0	0	0	0	0	0	0	0	0	0	0	0	0	0	0	0	0	0	0	0	0	0	0	0	0	0	0	0	0	0	0	0	0	0	0	0
sc12-81	8	0	0	0	0	0	0	0	0	0	0	0	0	0	0	0	0	0	0	0	0	0	0	0	0	0	0	0	0	0	0	0	0	0	0	0	0	0	0	0	0	0	0	1	1	0	0	0	0
sc12-91	14	0	0	0	0	1	0	0	0	0	0	0	0	0	0	0	0	0	0	0	1	0	0	0	0	0	0	0	1	1	0	1	1	0	0	0	1	0	0	1	0	0	0	0	0	0	0	1	0
sc12-92	15	0	0	0	1	0	0	0	0	0	0	0	0	0	0	0	0	0	0	1	0	0	0	0	0	0	0	1	1	1	0	1	1	0	0	0	1	0	0	1	0	0	0	1	1	1	1	1	0
sc12-93	13	0	0	0	1	1	0	0	0	0	0	0	1	0	0	0	0	0	0	1	0	0	0	0	0	0	0	0	1	1	0	1	1	0	0	0	1	0	0	1	0	0	0	0	0	1	1	1	0
sc12-96	13	0	0	0	1	1	0	0	0	0	0	0	0	0	0	0	0	0	0	1	0	0	0	0	0	0	0	0	1	1	1	1	1	0	1	0	1	0	1	1	0	0	0	0	0	0	0	1	0
sc12-97	11	0	0	0	0	0	0	0	0	0	0	0	1	0	0	0	0	0	1	0	1	0	0	0	0	0	0	0	0	0	1	0	1	1	1	0	1	1	1	0	0	0	0	0	0	0	0	1	0
sc12-98	9	0	0	0	1	0	0	0	0	0	0	0	0	0	1	0	0	0	0	0	0	0	0	0	0	0	0	0	0	0	1	0	1	1	1	0	1	1	1	0	0	0	0	0	0	0	0	0	0
sc12-99	12	0	0	0	0	0	0	0	0	0	0	0	0	0	0	1	0	0	0	0	0	0	0	0	0	0	0	0	1	1	0	1	1	0	0	0	1	0	0	1	0	0	0	1	1	0	0	0	0
sc13-121	14	0	0	0	0	0	0	0	0	0	0	0	0	0	0	0	0	0	0	0	0	1	0	1	1	0	0	1	1	1	1	1	1	0	1	0	1	1	0	1	0	0	0	0	0	0	0	0	0
sc14-175	13	0	0	0	0	0	0	0	0	0	0	0	0	0	0	0	0	0	0	1	0	0	0	0	0	0	0	1	1	1	1	1	1	1	1	0	1	1	1	1	0	0	0	0	0	0	0	0	0
sc14-184	13	0	0	0	0	0	0	0	0	0	0	0	0	0	0	0	0	0	0	1	0	0	0	0	0	0	0	0	1	1	0	1	1	0	0	0	1	0	0	1	0	0	0	0	0	0	0	0	0
sc14-186	11	0	0	0	0	0	0	0	0	0	0	0	0	0	0	0	0	0	0	0	0	1	0	1	1	0	0	0	1	1	0	1	1	0	0	0	1	0	0	1	0	1	0	0	0	0	0	0	0
sc14-188	13	0	0	0	0	1	0	0	0	0	0	0	1	0	0	0	0	1	0	1	0	0	0	0	0	0	0	0	1	1	0	1	1	0	0	0	1	0	0	1	0	0	0	1	1	0	0	1	0
sc14-202	16	0	0	0	0	0	0	0	0	0	0	0	0	0	0	0	0	0	0	0	0	0	0	0	0	0	0	1	1	1	1	1	1	1	1	0	1	1	1	1	0	0	0	0	0	0	0	1	0
sc14-203	16	0	0	1	0	0	0	0	0	0	0	0	0	0	0	0	0	0	0	1	0	0	0	0	0	0	0	1	1	1	1	1	1	1	1	0	1	1	1	1	0	0	0	0	0	0	0	1	1
sc14-204	19	0	0	0	0	0	0	0	0	0	0	0	1	0	1	0	0	0	0	1	0	0	0	0	0	0	0	1	1	1	1	1	1	1	1	0	1	1	1	1	0	0	0	0	0	0	0	1	0
sc14-205	0	0	0	0	0	0	0	0	0	0	0	0	0	0	0	0	0	0	0	0	0	0	0	0	0	0	0	0	0	0	0	0	0	0	0	0	0	0	0	0	0	0	0	0	0	0	0	0	0
sc14-211	5	0	0	0	1	0	0	0	0	0	0	0	1	0	0	0	0	0	0	0	0	0	0	0	0	0	0	0	0	0	0	0	0	0	0	0	0	0	0	0	0	0	0	0	0	0	0	1	0
sc14-212	5	0	0	0	1	0	0	0	0	0	0	0	1	0	0	0	0	0	0	0	0	0	0	0	0	0	0	0	0	0	0	0	0	0	0	0	0	0	0	0	0	0	0	0	0	0	0	1	0
sc14-213	8	0	0	0	0	0	0	0	0	0	0	0	0	0	0	0	0	0	1	0	0	0	0	0	0	0	0	0	0	0	0	0	0	0	0	0	0	0	0	0	1	1	1	0	0	0	0	0	0
sc14-215	4	0	0	0	1	0	0	0	0	0	0	0	1	0	0	0	0	0	0	0	0	0	0	0	0	0	0	0	0	0	0	0	0	0	0	0	0	0	0	0	0	0	0	0	0	0	0	1	0
sc14-216	8	0	0	0	0	0	0	0	0	0	0	0	0	0	0	0	0	0	1	0	0	0	0	0	0	0	0	0	0	0	0	0	0	0	0	0	0	0	0	0	1	1	1	0	0	0	0	0	0
sc14-217	8	0	0	0	0	0	0	0	0	0	0	0	0	0	0	0	0	0	1	0	0	0	0	0	0	0	0	0	0	0	0	0	0	0	0	0	0	0	0	0	1	1	1	0	0	0	0	0	0
sc14-218	4	0	0	0	1	0	0	0	0	0	0	0	1	0	0	0	0	0	0	0	0	0	0	0	0	0	0	0	0	0	0	0	0	0	0	0	0	0	0	0	0	0	0	0	0	0	0	1	0
sc14-219	11	0	0	0	0	0	0	0	0	0	0	0	0	0	0	0	0	0	1	1	0	0	0	0	0	0	0	1	1	1	0	1	1	0	0	0	1	0	0	1	0	0	0	0	0	0	0	1	0
sc14-220	13	0	0	0	0	1	0	0	0	0	0	0	1	0	0	0	0	1	0	1	0	0	0	0	0	0	0	0	1	1	0	1	1	0	0	0	1	0	0	1	0	0	0	1	1	0	0	1	0
SC516	0	0	0	0	0	0	0	0	0	0	0	0	0	0	0	0	0	0	0	0	0	0	0	0	0	0	0	0	0	0	0	0	0	0	0	0	0	0	0	0	0	0	0	0	0	0	0	0	0
SRR6058995	13	0	0	0	1	0	0	0	0	0	0	0	1	0	0	0	0	0	0	0	0	0	0	0	0	0	0	0	0	0	1	0	1	1	1	0	1	1	1	0	0	0	0	1	1	0	0	1	0
SRR6058997	13	0	0	0	1	0	0	0	0	0	0	0	1	0	0	0	0	0	0	0	0	0	0	0	0	0	0	0	0	0	1	0	1	1	1	0	1	1	1	0	0	0	0	1	1	0	0	1	0
SRR6059054	12	0	0	1	1	1	0	0	0	0	0	0	1	0	0	0	0	1	0	1	0	0	0	0	0	0	0	0	0	0	0	0	0	0	0	0	0	0	0	0	0	0	0	1	1	1	1	1	1
SRR6059055	12	0	0	1	1	1	0	0	0	0	0	0	1	0	0	0	0	1	0	1	0	0	0	0	0	0	0	0	0	0	0	0	0	0	0	0	0	0	0	0	0	0	0	1	1	1	1	1	1
SRR6059059	22	0	0	1	1	1	0	0	0	0	0	0	0	0	0	0	0	0	0	1	0	0	0	0	0	0	0	1	1	1	1	1	1	1	1	0	1	1	1	1	0	0	0	0	0	0	0	1	1
SRR6059076	9	0	0	1	0	1	0	0	0	0	0	0	1	0	0	0	0	0	0	1	0	0	0	0	0	0	0	0	0	0	0	0	0	0	0	0	0	0	0	0	0	0	0	1	1	0	0	1	1
SRR6059077	12	0	0	0	0	0	0	0	0	0	0	0	0	0	0	0	0	0	0	0	0	0	0	0	0	0	0	0	0	0	1	0	1	1	1	0	1	1	1	0	0	0	0	0	0	0	0	1	0
SRR6059078	22	0	0	1	1	0	0	0	0	0	0	0	0	0	0	0	0	0	0	1	0	0	0	0	0	0	0	1	1	1	1	1	1	1	1	0	1	1	1	1	0	0	0	0	0	1	1	1	1
SRR6059079	24	0	0	1	1	1	0	0	0	0	0	0	1	0	0	0	0	0	0	1	0	0	1	0	0	0	1	1	1	1	1	1	1	1	1	0	1	1	1	1	0	0	0	0	0	0	0	1	1
SRR6060707	13	0	0	1	0	1	0	0	0	0	0	0	1	0	0	0	0	0	0	1	0	0	0	0	0	0	0	0	1	1	0	1	1	0	0	0	1	0	0	1	0	0	0	0	0	0	0	1	1
SRR6060708	13	0	0	0	0	0	0	0	0	0	0	0	1	0	0	0	0	0	0	0	0	0	0	0	0	0	0	0	0	0	1	0	1	1	1	0	1	1	1	0	0	1	0	1	1	0	0	0	0
SRR6060725	10	0	0	1	0	1	0	0	0	0	0	0	0	0	0	0	0	0	0	1	0	0	0	0	0	0	0	0	1	1	0	1	1	0	0	0	1	0	0	1	0	0	0	0	0	0	0	0	1
SRR6060741	20	0	0	1	1	0	0	0	0	0	0	0	0	0	0	0	0	0	0	1	0	0	0	0	0	0	0	1	1	1	1	1	1	1	1	0	1	1	1	1	0	0	0	1	1	0	0	1	1
SRR6060746	19	0	0	1	0	1	0	0	0	0	0	0	0	0	0	0	0	0	0	1	0	0	0	0	0	0	0	1	1	1	1	1	1	1	1	0	1	1	1	1	0	0	0	1	1	0	0	1	1
SRR6062054	18	0	0	1	0	0	0	0	0	0	0	0	0	0	0	0	0	0	0	1	0	0	0	0	0	0	0	1	1	1	1	1	1	1	1	0	1	1	1	1	0	0	0	1	1	0	0	1	1
SRR6062055	19	0	0	1	0	1	0	0	0	0	0	0	0	0	0	0	0	0	0	1	0	0	0	0	0	0	0	1	1	1	1	1	1	1	1	0	1	1	1	1	0	0	0	1	1	0	0	1	1
SRR6062249	24	0	0	1	1	1	0	0	0	0	0	0	0	0	1	0	0	0	0	1	0	0	0	0	0	0	0	1	1	1	1	1	1	1	1	0	1	1	1	1	0	0	0	0	0	0	0	0	1
SRR6062251	8	0	0	0	0	0	0	0	0	0	0	0	0	0	0	0	0	0	0	1	0	0	0	0	0	0	0	0	0	0	0	0	0	0	0	0	0	0	0	0	0	0	0	1	1	0	0	0	0
SRR6062538	13	0	0	1	0	0	0	0	0	0	0	0	0	0	0	0	0	0	0	1	0	0	0	0	0	0	0	0	1	1	0	1	1	0	0	0	1	0	0	1	0	0	0	0	0	0	0	1	1
SRR6062539	13	0	0	0	0	0	0	0	0	0	0	0	0	0	0	0	0	0	0	0	0	0	0	0	0	0	0	0	0	0	1	0	1	1	1	0	1	1	1	0	0	0	0	1	1	0	0	1	0
SRR6062540	14	0	0	1	0	0	0	0	0	0	0	0	0	0	0	0	0	0	0	1	0	0	0	0	0	0	0	0	1	1	0	1	1	0	0	0	1	0	0	1	0	0	0	0	0	0	0	1	1
SRR6065852	11	0	0	0	0	0	0	0	0	0	0	0	0	0	0	0	0	0	0	0	0	0	0	0	0	0	0	0	0	0	1	0	1	1	1	0	1	1	1	0	0	0	0	0	0	0	0	1	0
SRR6066070	20	0	0	0	0	0	1	0	0	0	0	0	0	0	0	0	0	0	0	1	0	0	0	0	0	0	0	1	1	1	1	1	1	1	1	0	1	1	1	1	0	0	0	1	1	0	0	0	0
SRR6066178	9	0	0	0	0	0	0	0	0	0	0	0	0	0	0	0	0	0	0	0	0	0	0	0	0	0	0	0	0	0	1	0	1	1	1	0	1	1	1	0	0	1	0	0	0	0	0	0	0
SRR6066443	15	0	0	0	1	0	0	0	0	0	0	0	1	0	0	0	0	0	0	1	0	0	0	0	0	0	0	1	1	1	1	1	1	1	1	0	1	1	0	1	0	0	0	0	0	0	0	0	0
SRR6066606	26	0	0	1	1	1	0	0	0	0	0	0	1	0	0	0	0	0	0	1	0	0	1	0	0	0	1	1	1	1	1	1	1	1	1	0	1	1	1	1	0	0	0	0	0	1	1	1	1
SRR6066875	15	0	0	1	0	0	0	0	0	0	0	0	0	0	0	0	0	1	0	1	0	0	0	0	0	0	0	0	1	0	1	1	1	1	1	0	1	1	1	0	0	0	0	0	0	0	0	1	1
SRR6066876	12	0	0	0	0	0	0	0	0	0	0	0	0	0	0	0	0	0	0	0	0	0	0	0	0	0	0	0	0	0	1	0	1	1	1	0	1	1	1	0	0	1	0	1	1	0	0	1	0
SRR6066877	11	0	0	0	0	0	0	0	0	0	0	0	0	0	0	0	0	0	0	1	0	0	0	0	0	0	0	0	0	0	1	0	1	1	1	0	1	1	1	0	0	0	0	0	0	0	0	0	0
SRR6066878	11	0	0	0	1	0	0	0	0	0	0	0	1	0	0	0	0	0	0	0	0	0	0	0	0	0	0	0	0	0	1	0	1	1	1	0	0	1	1	0	0	0	0	1	1	0	0	1	0
SRR6066879	14	0	0	0	0	0	0	0	0	0	0	0	0	0	0	0	0	0	0	1	0	0	0	0	0	0	0	0	1	1	1	1	1	1	1	0	1	1	1	1	0	0	0	0	0	0	0	1	0
SRR6066880	19	0	0	0	1	0	0	0	0	0	0	0	1	0	0	0	0	0	0	0	1	0	0	0	0	0	0	0	1	1	1	1	1	1	1	0	1	1	0	1	0	0	0	0	0	0	0	0	0
SRR6067070	16	0	0	0	0	0	0	0	0	0	0	0	0	0	0	0	0	0	0	1	0	0	0	0	0	0	0	1	1	1	1	1	1	1	1	0	1	1	1	1	0	0	0	1	1	0	0	1	0
SRR6067071	19	0	0	0	1	0	0	0	0	0	0	0	0	0	0	0	0	0	0	1	0	0	0	0	0	0	0	1	1	1	1	1	1	1	1	0	1	1	1	1	0	0	0	0	0	0	0	1	0
SRR6067090	16	0	0	0	0	0	0	0	0	0	0	0	1	0	0	0	0	0	0	1	0	0	0	0	0	0	0	1	1	1	1	1	1	1	1	0	1	1	1	1	0	0	0	0	0	0	0	1	0
SRR6067091	19	0	0	0	0	0	0	0	0	0	0	0	0	0	0	0	0	0	0	1	0	0	0	0	0	0	0	1	1	1	1	1	1	1	1	0	1	1	1	1	0	0	0	0	0	1	1	1	0
SRR6067092	16	0	0	0	0	0	0	0	0	0	0	0	1	0	0	0	0	0	0	1	0	0	0	0	0	0	0	1	1	1	1	1	1	1	1	0	1	1	1	1	0	0	0	0	0	0	0	1	0
SRR6067093	16	0	0	0	0	0	0	0	0	0	0	0	1	0	0	0	0	0	0	1	0	0	0	0	0	0	0	1	1	1	1	1	1	1	1	0	1	1	1	1	0	0	0	0	0	0	0	1	0
SRR6069470	16	0	0	0	1	0	0	0	0	0	0	0	1	0	0	0	0	0	0	1	0	0	0	0	0	0	0	1	1	1	1	1	1	1	1	0	1	1	1	1	0	0	0	0	0	0	0	1	0
SRR9914076	12	0	0	0	0	0	0	0	0	0	0	0	0	0	0	0	0	0	0	0	0	0	0	0	0	0	0	0	1	1	0	1	1	0	0	0	1	0	0	1	0	0	0	0	0	0	0	1	0
SRR9914082	10	0	0	0	0	0	0	0	0	0	0	0	0	0	0	0	0	1	0	1	0	0	0	0	0	0	0	0	1	1	0	1	1	0	0	0	1	0	1	1	0	0	0	0	0	0	0	0	0
SRR9914083	5	0	0	0	1	0	0	0	0	0	0	0	0	0	0	0	0	0	0	0	0	0	0	0	0	0	0	0	0	0	0	0	0	0	0	0	0	0	0	0	0	0	0	0	0	0	0	0	0
SSWI	18	0	0	0	0	0	0	0	0	0	0	0	0	0	0	0	0	0	1	1	0	0	0	0	0	0	0	1	1	1	1	1	1	1	1	0	1	1	1	1	1	1	1	0	0	0	0	0	0
SSWJ	9	0	0	0	0	0	0	0	0	0	0	0	0	0	0	0	0	0	1	0	1	0	0	0	0	0	0	0	0	0	0	0	0	0	0	0	0	0	0	0	1	1	1	0	0	0	0	0	0
SSWK	8	0	0	0	0	0	0	0	0	0	0	0	0	0	0	0	0	0	1	0	1	0	0	0	0	0	0	0	0	0	0	0	0	0	0	0	0	0	0	0	0	0	0	0	0	1	1	0	0
ST95-32	15	0	0	0	0	0	0	0	0	0	0	0	0	0	0	0	0	0	0	1	0	0	0	0	0	0	0	1	1	1	1	1	1	1	1	0	1	1	1	1	0	0	0	1	1	0	0	0	0
SVID	21	0	0	0	1	0	0	0	0	0	0	0	0	0	1	0	0	0	0	0	0	0	0	0	0	0	0	0	1	1	1	1	1	1	1	0	1	1	1	1	0	0	0	0	0	1	1	1	0
SWP12	9	0	0	0	0	0	0	0	0	0	0	0	0	0	0	0	0	0	0	1	0	0	1	0	0	0	1	0	1	1	0	1	1	0	0	0	1	0	0	1	0	0	0	0	0	0	0	0	0
SWZ22	14	0	0	0	0	0	0	0	0	0	0	0	0	0	0	0	0	1	0	1	0	0	0	0	0	0	0	0	0	0	1	1	0	1	1	0	0	1	1	0	0	1	0	0	0	0	0	0	0
SXGP	11	0	0	0	1	0	0	0	0	0	0	0	0	0	0	0	0	0	0	0	0	0	0	0	0	0	0	0	0	0	0	0	0	0	0	0	0	0	0	0	0	0	0	0	0	0	0	0	0
TZ1	0	0	0	0	0	0	0	0	0	0	0	0	0	0	0	0	0	0	0	0	0	0	0	0	0	0	0	0	0	0	0	0	0	0	0	0	0	0	0	0	0	0	0	0	0	0	0	0	0
TZ10	14	1	1	0	0	0	0	0	0	0	0	0	0	0	0	0	0	0	0	1	0	0	0	0	0	0	0	0	1	1	1	1	1	0	1	0	1	0	1	1	0	1	0	0	0	0	0	0	0
TZ11	14	0	0	0	0	0	0	0	0	0	0	0	0	0	0	0	0	0	0	1	0	0	0	0	0	0	0	1	1	1	1	1	1	1	1	0	1	1	1	1	0	0	0	0	0	0	0	0	0
TZ12	14	0	0	0	0	0	0	0	0	0	0	0	0	0	0	0	0	0	0	1	0	0	0	0	0	0	0	1	1	1	1	1	1	1	1	0	1	1	1	1	0	0	0	0	0	0	0	0	0
TZ2	1	0	0	0	0	0	0	0	0	0	0	0	0	0	0	0	0	0	0	0	0	0	0	0	0	0	0	0	0	0	0	0	0	0	0	0	0	0	0	0	0	0	0	0	0	0	0	0	0
TZ3	16	0	0	0	0	0	0	0	0	0	0	0	0	0	0	0	0	0	0	1	0	0	0	0	0	0	0	1	1	1	1	1	1	1	1	0	1	1	1	1	0	0	0	0	0	0	0	0	0
TZ5	15	0	0	0	0	0	0	0	0	0	0	0	1	0	0	0	1	0	0	1	0	0	0	0	0	0	0	1	1	1	1	1	1	1	1	0	1	1	1	1	0	0	0	0	0	0	0	0	0
TZ7	12	0	0	0	0	0	0	0	0	0	0	0	1	0	0	0	0	0	0	1	0	0	0	0	0	0	0	0	1	1	1	1	1	0	1	0	1	1	0	1	0	0	0	0	0	0	0	0	0
TZ9	0	0	0	0	0	0	0	0	0	0	0	0	0	0	0	0	0	0	0	0	0	0	0	0	0	0	0	0	0	0	0	0	0	0	0	0	0	0	0	0	0	0	0	0	0	0	0	0	0
VVIO	5	0	0	0	0	0	0	0	0	0	0	0	0	0	0	0	0	0	0	0	1	0	0	0	0	0	0	0	0	0	0	0	0	0	0	0	0	0	0	0	0	0	0	1	1	0	0	1	0
VXKX	12	0	0	0	0	1	0	0	0	0	0	0	0	0	0	0	0	0	0	0	0	0	0	0	0	0	0	0	0	0	0	0	0	0	0	0	0	0	0	0	0	1	0	1	1	0	0	0	0
VXKY	20	0	0	0	0	0	0	0	0	0	0	0	0	0	0	0	0	0	0	1	0	0	0	0	0	0	0	1	1	1	1	1	1	1	1	0	1	1	1	1	0	0	0	0	0	0	0	0	0
WFA04	5	1	1	0	0	0	0	0	0	0	0	0	0	0	0	0	0	0	0	0	0	0	0	0	0	0	0	0	0	0	0	0	0	0	0	0	0	0	0	0	0	0	0	1	1	0	0	0	0
WFA05	6	0	0	0	0	1	0	0	0	0	0	0	0	0	0	0	0	1	0	1	0	0	0	0	0	0	0	0	0	0	0	0	0	0	0	0	0	0	0	0	0	0	0	0	0	0	0	0	0
WFA160	8	0	0	0	1	0	0	0	0	0	0	0	0	0	1	0	0	0	0	0	0	0	0	0	0	0	0	0	0	0	0	0	0	0	0	0	0	0	0	0	0	0	0	1	1	0	0	0	0
WFA174	18	0	0	0	0	0	0	0	0	0	0	0	0	0	0	0	0	0	0	0	0	0	0	0	0	0	0	0	1	1	1	1	1	0	1	1	1	1	0	1	0	0	0	0	0	0	0	0	0
WFA64	10	0	0	0	1	0	0	0	0	0	0	0	0	0	0	0	0	1	0	1	0	0	0	0	0	0	0	0	0	0	0	0	0	0	0	0	0	0	0	0	0	0	0	1	1	1	1	0	0
WHC4	14	0	0	0	1	0	0	0	0	0	0	0	0	0	0	0	0	0	0	1	0	0	0	0	0	0	0	1	1	1	1	1	1	1	1	0	1	1	1	1	0	0	0	0	0	0	0	0	0
X107	9	0	0	0	0	0	0	0	0	0	0	0	0	0	0	0	0	0	0	1	0	0	0	0	0	0	0	0	1	1	0	1	1	0	0	0	1	0	0	1	0	0	0	0	0	1	1	0	0
XF1-3f	9	1	1	1	1	0	0	0	0	0	0	0	0	0	1	0	1	0	0	1	0	0	0	0	0	0	0	0	0	0	0	0	0	0	0	0	0	0	0	0	0	0	0	0	0	0	0	1	1
XF1-3g	6	0	0	0	0	0	0	0	0	0	0	0	0	0	0	0	0	0	0	0	1	0	0	0	0	0	0	0	0	0	0	0	0	0	0	0	0	0	0	0	0	0	0	1	1	0	0	0	0
YJC10	17	0	0	0	1	1	0	0	0	0	0	0	1	0	1	0	0	0	1	0	1	0	0	0	0	0	0	0	1	1	0	1	1	0	0	0	1	0	0	1	0	0	0	0	0	1	1	1	0
YJC15	19	1	1	0	0	0	0	0	0	0	0	0	0	0	0	0	0	0	0	1	0	0	0	0	0	0	0	1	1	1	1	1	1	1	1	0	1	1	1	1	0	0	0	0	0	0	0	0	0
YJC2	6	0	0	0	0	0	0	0	0	0	0	0	0	0	0	0	0	0	0	0	0	0	1	0	0	0	1	0	0	0	0	0	0	0	0	0	0	0	0	0	0	0	0	0	0	1	1	1	0
YJC80	19	1	1	0	0	0	0	0	0	0	0	0	0	0	0	0	0	0	0	1	0	0	0	0	0	0	0	1	1	1	1	1	1	1	1	0	1	1	1	1	0	0	0	0	0	0	0	0	0
YJC9	4	0	0	0	0	0	0	0	0	0	0	0	0	0	0	0	0	0	0	0	0	0	0	0	0	0	0	0	0	0	0	0	0	0	0	0	0	0	0	0	0	0	0	0	0	1	1	1	0
YSP8-1	19	0	0	0	0	0	0	0	0	0	0	0	0	0	0	0	0	1	1	1	0	0	0	0	0	0	0	0	1	1	0	1	1	0	0	0	1	0	0	1	1	1	1	0	0	0	0	0	0
YY76-1	10	0	0	0	0	0	0	0	0	0	0	0	0	0	0	0	0	0	0	0	0	0	0	0	0	1	0	0	0	0	0	0	0	0	0	0	0	0	0	0	0	0	0	0	0	0	0	0	0
YZ032	13	0	0	0	0	0	0	0	0	0	0	0	0	0	0	0	0	0	0	1	0	0	0	0	0	0	0	1	1	1	1	1	1	1	1	0	1	1	1	1	0	0	0	0	0	0	0	0	0
YZ069	20	0	0	0	1	0	0	0	0	0	0	0	1	0	0	0	0	0	0	1	0	0	0	0	0	0	0	0	1	1	1	1	1	0	1	0	1	1	0	1	0	0	0	1	1	1	1	0	0
YZ105	17	0	0	1	0	0	0	0	0	0	0	0	1	0	0	0	0	0	0	1	0	0	0	0	0	0	0	1	1	1	1	1	1	1	1	0	1	1	1	1	0	0	0	0	0	0	0	0	1
YZ120	21	0	0	0	1	1	0	0	0	0	0	0	0	0	1	0	1	0	0	1	1	0	0	0	0	0	0	1	1	1	1	1	1	1	1	0	1	1	1	1	0	0	0	0	0	0	0	0	0
YZ124	15	0	0	0	1	0	0	0	0	0	0	0	0	0	0	0	0	0	0	1	0	0	0	0	0	0	0	1	1	1	1	1	1	1	1	0	1	1	1	1	0	0	0	0	0	0	0	1	0
YZ126	16	0	0	0	1	0	0	0	0	0	0	0	0	0	0	0	0	0	0	1	0	0	0	0	0	0	0	1	1	1	1	1	1	1	1	0	1	1	1	1	0	0	0	1	1	0	0	0	0
YZ156	11	0	0	0	0	0	0	0	0	0	0	0	0	0	0	0	0	0	0	1	0	0	0	0	0	0	0	0	1	1	1	1	1	0	1	0	1	0	0	1	0	0	0	0	0	1	1	0	0
YZ207	21	0	0	0	1	0	0	0	0	0	0	0	0	0	0	0	0	0	0	1	0	0	0	0	0	0	0	1	1	1	1	1	1	1	1	0	1	1	1	1	0	0	0	0	0	1	1	0	0
YZ208	16	0	0	0	0	0	0	0	0	0	0	0	0	0	0	0	0	0	0	1	0	0	0	0	0	0	0	1	1	1	1	1	1	1	1	0	1	1	1	1	0	0	0	0	0	0	0	0	0
YZ235	15	0	0	0	0	0	0	0	0	0	0	0	0	0	0	0	0	0	0	1	0	0	0	0	0	0	0	1	1	1	1	1	1	1	1	0	1	1	1	1	0	0	0	0	0	1	1	0	0
YZ258	16	0	0	0	0	0	0	0	0	0	0	0	0	0	0	0	1	0	0	1	1	0	0	0	0	0	0	1	1	1	1	1	1	1	1	0	1	1	1	1	0	0	0	0	0	0	0	0	0
YZ265	21	0	0	0	0	0	0	0	0	0	0	0	1	0	0	0	0	0	0	1	0	0	0	0	0	0	0	1	1	1	1	1	1	1	1	0	1	1	1	1	0	0	0	0	0	1	1	0	0
YZ267	12	0	0	0	0	0	0	0	0	0	0	0	1	0	0	0	0	0	0	1	0	0	0	0	0	0	0	0	1	1	0	1	1	0	0	0	1	0	0	1	0	0	0	0	0	0	0	1	0
YZ268	15	0	0	0	0	0	0	0	0	0	0	0	0	0	0	0	0	0	0	1	0	0	0	0	0	0	0	1	1	1	1	1	1	1	1	0	1	1	1	1	0	0	0	0	0	1	1	0	0
YZ315	16	0	0	0	0	0	0	0	0	0	0	0	0	0	0	0	0	0	0	1	0	0	0	0	0	0	0	1	1	1	1	1	1	1	1	0	1	1	1	1	0	0	0	0	0	1	1	0	0
YZ413	14	0	0	0	0	0	0	0	0	0	0	0	0	0	0	0	0	0	0	1	1	0	0	0	0	0	0	1	1	1	1	1	1	1	1	0	1	1	1	1	0	0	0	0	0	0	0	0	0
YZ483	13	0	0	0	1	0	0	0	0	0	0	0	0	0	1	0	0	0	0	1	0	0	0	0	0	0	0	0	1	1	0	1	1	0	0	0	1	0	0	1	0	0	0	0	0	0	0	0	0
YZ505	10	0	0	0	0	0	0	0	0	0	0	0	0	0	0	0	0	0	0	1	0	0	0	0	0	0	0	0	1	1	0	1	1	0	0	0	1	0	0	1	0	0	0	0	0	1	1	0	0
YZ523	19	0	0	0	0	0	0	0	0	0	0	0	1	0	0	0	0	0	0	1	0	0	0	0	0	0	0	1	1	1	1	1	1	1	1	0	1	1	1	1	0	0	0	0	0	0	0	0	0
YZ554	19	0	0	1	1	1	0	0	0	0	0	0	1	0	1	0	0	0	0	1	0	0	0	0	0	0	0	0	1	0	1	1	1	1	1	0	0	1	1	0	0	0	0	1	1	1	1	0	1
YZ606	6	0	0	0	0	0	0	0	0	0	0	0	1	0	0	0	0	0	0	0	0	0	0	0	0	0	0	0	0	0	0	0	0	0	0	0	0	0	0	0	0	1	0	0	0	0	0	0	0
YZ610	19	0	0	0	0	0	0	0	0	0	0	0	0	0	0	0	0	0	0	1	0	0	0	0	0	0	0	1	1	1	1	1	1	1	1	0	1	1	1	1	0	0	0	1	1	0	0	0	0
YZ618	11	0	0	0	0	0	0	0	0	0	0	0	0	0	0	0	0	0	0	1	0	0	1	0	0	0	1	0	1	1	0	1	1	0	0	0	1	0	0	1	0	0	0	1	1	0	0	0	0
YZ629	0	0	0	0	0	0	0	0	0	0	0	0	0	0	0	0	0	0	0	0	0	0	0	0	0	0	0	0	0	0	0	0	0	0	0	0	0	0	0	0	0	0	0	0	0	0	0	0	0
YZ644	20	0	0	0	1	1	0	0	0	0	0	0	0	0	0	0	0	0	0	1	0	0	0	0	0	0	0	1	1	1	1	1	1	1	1	0	1	1	1	1	0	0	0	0	0	0	0	0	0
YZ645	7	0	0	0	0	0	0	0	0	0	0	0	0	0	0	0	0	0	0	1	0	0	0	0	0	0	0	0	1	1	0	1	1	0	0	0	1	0	0	1	0	0	0	0	0	0	0	0	0
YZ655	20	0	0	0	1	1	0	0	0	0	0	0	0	0	0	0	0	0	0	1	0	0	0	0	0	0	0	1	1	1	1	1	1	1	1	0	1	1	1	1	0	0	0	0	0	0	0	0	0
YZ695	15	0	0	0	0	0	0	0	0	0	0	0	0	0	0	0	0	0	0	1	0	0	0	0	0	0	0	1	1	1	1	1	1	1	1	0	1	1	1	1	0	0	0	0	0	1	1	0	0
ZLP1	15	1	1	0	0	0	0	0	0	0	0	0	1	0	0	0	0	0	0	0	0	0	1	0	0	0	1	0	1	1	1	1	1	0	1	0	1	1	0	1	0	0	0	0	0	0	0	0	0
ZLP12	5	0	0	0	1	0	0	0	1	0	0	0	0	0	0	0	0	0	0	0	0	0	0	0	0	0	0	0	0	0	0	0	0	0	0	0	0	0	0	0	0	0	0	0	0	0	0	0	0
ZLP13	15	0	0	0	0	0	0	0	0	0	0	0	0	0	0	0	0	0	0	1	0	0	0	0	0	0	0	0	1	1	0	1	1	0	0	0	1	0	0	1	0	0	0	0	0	0	0	0	0
zlp18	13	0	0	0	0	1	0	0	0	0	0	0	1	0	0	0	0	1	0	1	0	0	0	0	0	0	0	0	1	1	0	1	1	0	0	0	1	0	0	1	0	0	0	1	1	0	0	1	0
ZLP5	9	0	0	0	0	0	0	0	0	0	0	0	0	0	0	0	0	0	0	1	0	0	1	0	0	0	1	0	1	1	0	1	1	0	0	0	1	0	0	1	0	0	0	0	0	0	0	0	0
ZLP7	1	0	0	0	0	0	0	0	0	0	0	0	1	0	0	0	0	0	0	0	0	0	0	0	0	0	0	0	0	0	0	0	0	0	0	0	0	0	0	0	0	0	0	0	0	0	0	0	0
ZZ1-5g	14	0	0	0	0	1	0	0	0	0	0	0	1	0	0	0	0	0	0	0	0	0	0	0	0	0	0	0	1	1	0	1	1	0	0	0	1	0	0	1	0	0	0	0	0	0	0	1	0
ZZA43	16	0	0	0	1	0	0	0	0	0	0	0	1	0	0	0	0	0	0	0	0	0	0	0	0	0	0	0	1	1	1	1	1	1	1	0	1	1	0	1	0	0	0	1	1	0	0	0	0
ZZA45	16	0	0	0	1	0	0	0	0	0	0	0	1	0	0	0	0	0	0	0	0	0	0	0	0	0	0	0	1	1	1	1	1	1	1	0	1	1	0	1	0	0	0	1	1	0	0	0	0
[truncated: 984 more columns]
